# Supplementary material for: Repeated evolution of circadian clock dysregulation in cavefish populations
Source: PLoS Genet. 2021 Jul 12;17(7):e1009642. doi: 10.1371/journal.pgen.1009642 (PMC8297936; doi:10.1371/journal.pgen.1009642)
Supplement: S3 Data — (XLSX) [file pgen.1009642.s004.xlsx]

## Sheet: Sheet1
CHROM	POS	REF_ALLELE	ALT_ALLELE	TRANSCRIPT_ID	GENE_ID	GENE_NAME	REGION	VARIANT_TYPE	REF_AMINO	ALT_AMINO	AMINO_POS	SIFT_SCORE	SIFT_MEDIAN	NUM_SEQS	dbSNP	SIFT_PREDICTION
NW_019170544.1	9466423	G	A	ENSAMXT00000000235	ENSAMXG00000000221	grhl2a	CDS	SYNONYMOUS	T	T	17	0.64	2.61	322	novel	TOLERATED
NW_019170544.1	9466438	T	C	ENSAMXT00000000235	ENSAMXG00000000221	grhl2a	CDS	SYNONYMOUS	R	R	22	1	2.6	328	novel	TOLERATED
NW_019170544.1	9466440	G	C	ENSAMXT00000000235	ENSAMXG00000000221	grhl2a	CDS	NONSYNONYMOUS	R	P	23	0.02	2.58	329	novel	DELETERIOUS
NW_019170544.1	9466441	T	C	ENSAMXT00000000235	ENSAMXG00000000221	grhl2a	CDS	SYNONYMOUS	R	R	23	1	2.58	329	novel	TOLERATED
NW_019170544.1	9466465	C	A	ENSAMXT00000000235	ENSAMXG00000000221	grhl2a	CDS	SYNONYMOUS	A	A	31	1	2.55	351	novel	TOLERATED
NW_019170544.1	9466486	T	C	ENSAMXT00000000235	ENSAMXG00000000221	grhl2a	CDS	SYNONYMOUS	N	N	38	1	2.55	353	novel	TOLERATED
NW_019170544.1	9466489	T	C	ENSAMXT00000000235	ENSAMXG00000000221	grhl2a	CDS	SYNONYMOUS	P	P	39	1	2.57	351	novel	TOLERATED
NW_019170544.1	9466495	T	C	ENSAMXT00000000235	ENSAMXG00000000221	grhl2a	CDS	SYNONYMOUS	T	T	41	1	2.57	353	novel	TOLERATED
NW_019170544.1	9467704	G	T	ENSAMXT00000000235	ENSAMXG00000000221	grhl2a	CDS	NONSYNONYMOUS	D	Y	85	0.08	2.58	353	novel	TOLERATED
NW_019170544.1	9467704	G	GA	ENSAMXT00000000235	ENSAMXG00000000221	grhl2a	CDS	FRAMESHIFT INSERTION	NA	NA	NA	NA	NA	NA	NA	NA
NW_019170544.1	9467887	G	A	ENSAMXT00000000235	ENSAMXG00000000221	grhl2a	CDS	SYNONYMOUS	R	R	87	1	2.57	319	novel	TOLERATED
NW_019170544.1	9467888	T	A	ENSAMXT00000000235	ENSAMXG00000000221	grhl2a	CDS	NONSYNONYMOUS	L	I	88	0.41	2.57	314	novel	TOLERATED
NW_019170544.1	9467895	A	T	ENSAMXT00000000235	ENSAMXG00000000221	grhl2a	CDS	NONSYNONYMOUS	H	L	90	0.59	2.57	345	novel	TOLERATED
NW_019170544.1	9467901	A	G	ENSAMXT00000000235	ENSAMXG00000000221	grhl2a	CDS	NONSYNONYMOUS	D	G	92	0.21	2.57	361	novel	TOLERATED
NW_019170544.1	9467902	TGTGGACTCA	T	ENSAMXT00000000235	ENSAMXG00000000221	grhl2a	CDS	NONFRAMESHIFT DELETION	NA	NA	NA	NA	NA	NA	NA	NA
NW_019170544.1	9467909	T	G	ENSAMXT00000000235	ENSAMXG00000000221	grhl2a	CDS	NONSYNONYMOUS	S	A	95	0.42	2.56	365	novel	TOLERATED
NW_019170544.1	9467920	A	G	ENSAMXT00000000235	ENSAMXG00000000221	grhl2a	CDS	SYNONYMOUS	E	E	98	0.24	2.54	370	novel	TOLERATED
NW_019170544.1	9467924	G	A	ENSAMXT00000000235	ENSAMXG00000000221	grhl2a	CDS	NONSYNONYMOUS	V	I	100	0.38	2.56	370	novel	TOLERATED
NW_019170544.1	9467932	T	A	ENSAMXT00000000235	ENSAMXG00000000221	grhl2a	CDS	SYNONYMOUS	A	A	102	0.34	2.56	369	novel	TOLERATED
NW_019170544.1	9467942	G	C	ENSAMXT00000000235	ENSAMXG00000000221	grhl2a	CDS	NONSYNONYMOUS	V	L	106	0.64	2.57	335	novel	TOLERATED
NW_019170544.1	9467973	C	A	ENSAMXT00000000235	ENSAMXG00000000221	grhl2a	CDS	NONSYNONYMOUS	S	Y	116	0.17	2.5	311	novel	TOLERATED
NW_019170544.1	9467975	C	A	ENSAMXT00000000235	ENSAMXG00000000221	grhl2a	CDS	NONSYNONYMOUS	H	N	117	0.22	2.54	345	novel	TOLERATED
NW_019170544.1	9467987	A	T	ENSAMXT00000000235	ENSAMXG00000000221	grhl2a	CDS	NONSYNONYMOUS	M	L	121	0.49	2.54	341	novel	TOLERATED
NW_019170544.1	9467993	A	C	ENSAMXT00000000235	ENSAMXG00000000221	grhl2a	CDS	SYNONYMOUS	R	R	123	1	2.57	330	novel	TOLERATED
NW_019170544.1	9467996	A	C	ENSAMXT00000000235	ENSAMXG00000000221	grhl2a	CDS	NONSYNONYMOUS	N	H	124	0.11	2.58	328	novel	TOLERATED
NW_019170544.1	9467996	A	G	ENSAMXT00000000235	ENSAMXG00000000221	grhl2a	CDS	NONSYNONYMOUS	N	D	124	0.83	2.58	328	novel	TOLERATED
NW_019170544.1	9468033	T	C	ENSAMXT00000000235	ENSAMXG00000000221	grhl2a	CDS	NONSYNONYMOUS	V	A	136	0.3	2.59	353	novel	TOLERATED
NW_019170544.1	9468035	G	A	ENSAMXT00000000235	ENSAMXG00000000221	grhl2a	CDS	NONSYNONYMOUS	A	T	137	0.5	2.57	365	novel	TOLERATED
NW_019170544.1	9468035	G	C	ENSAMXT00000000235	ENSAMXG00000000221	grhl2a	CDS	NONSYNONYMOUS	A	P	137	0.12	2.57	365	novel	TOLERATED
NW_019170544.1	9468038	C	A	ENSAMXT00000000235	ENSAMXG00000000221	grhl2a	CDS	NONSYNONYMOUS	P	T	138	0.33	2.57	362	novel	TOLERATED
NW_019170544.1	9468047	C	CAGAGTG	ENSAMXT00000000235	ENSAMXG00000000221	grhl2a	CDS	NONFRAMESHIFT INSERTION	NA	NA	NA	NA	NA	NA	NA	NA
NW_019170544.1	9468052	G	A	ENSAMXT00000000235	ENSAMXG00000000221	grhl2a	CDS	SYNONYMOUS	E	E	142	1	2.56	346	novel	TOLERATED
NW_019170544.1	9468059	G	A	ENSAMXT00000000235	ENSAMXG00000000221	grhl2a	CDS	NONSYNONYMOUS	A	T	145	0.5	2.58	361	novel	TOLERATED
NW_019170544.1	9468079	G	C	ENSAMXT00000000235	ENSAMXG00000000221	grhl2a	CDS	NONSYNONYMOUS	Q	H	151	0.29	2.56	357	novel	TOLERATED
NW_019170544.1	9468091	A	C	ENSAMXT00000000235	ENSAMXG00000000221	grhl2a	CDS	NONSYNONYMOUS	E	D	155	0.56	2.58	371	novel	TOLERATED
NW_019170544.1	9468109	A	G	ENSAMXT00000000235	ENSAMXG00000000221	grhl2a	CDS	SYNONYMOUS	L	L	161	0.41	2.58	352	novel	TOLERATED
NW_019170544.1	9468121	A	G	ENSAMXT00000000235	ENSAMXG00000000221	grhl2a	CDS	SYNONYMOUS	Q	Q	165	1	2.54	347	novel	TOLERATED
NW_019170544.1	9468145	C	T	ENSAMXT00000000235	ENSAMXG00000000221	grhl2a	CDS	SYNONYMOUS	I	I	173	0.42	2.57	366	novel	TOLERATED
NW_019170544.1	9468151	T	C	ENSAMXT00000000235	ENSAMXG00000000221	grhl2a	CDS	SYNONYMOUS	H	H	175	1	2.58	362	novel	TOLERATED
NW_019170544.1	9468157	T	C	ENSAMXT00000000235	ENSAMXG00000000221	grhl2a	CDS	SYNONYMOUS	R	R	177	0.59	2.59	352	novel	TOLERATED
NW_019170544.1	9468172	A	G	ENSAMXT00000000235	ENSAMXG00000000221	grhl2a	CDS	SYNONYMOUS	E	E	182	0.76	2.54	379	novel	TOLERATED
NW_019170544.1	9468175	GA	AA	ENSAMXT00000000235	ENSAMXG00000000221	grhl2a	CDS	SUBSTITUTION	NA	NA	NA	NA	NA	NA	NA	NA
NW_019170544.1	9468175	GA	G	ENSAMXT00000000235	ENSAMXG00000000221	grhl2a	CDS	FRAMESHIFT DELETION	NA	NA	NA	NA	NA	NA	NA	NA
NW_019170544.1	9468176	A	C	ENSAMXT00000000235	ENSAMXG00000000221	grhl2a	CDS	SYNONYMOUS	R	R	184	1	2.54	377	novel	TOLERATED
NW_019170544.1	9468177	G	A	ENSAMXT00000000235	ENSAMXG00000000221	grhl2a	CDS	NONSYNONYMOUS	R	K	184	0.12	2.54	377	novel	TOLERATED
NW_019170544.1	9468182	G	A	ENSAMXT00000000235	ENSAMXG00000000221	grhl2a	CDS	NONSYNONYMOUS	V	M	186	0.02	2.56	372	novel	DELETERIOUS
NW_019170544.1	9468182	G	T	ENSAMXT00000000235	ENSAMXG00000000221	grhl2a	CDS	NONSYNONYMOUS	V	L	186	0.06	2.56	372	novel	TOLERATED
NW_019170544.1	9468187	G	A	ENSAMXT00000000235	ENSAMXG00000000221	grhl2a	CDS	SYNONYMOUS	P	P	187	1	2.56	373	novel	TOLERATED
NW_019170544.1	9468214	T	C	ENSAMXT00000000235	ENSAMXG00000000221	grhl2a	CDS	SYNONYMOUS	T	T	196	0.59	2.54	353	novel	TOLERATED
NW_019170544.1	9468216	GA	G	ENSAMXT00000000235	ENSAMXG00000000221	grhl2a	CDS	FRAMESHIFT DELETION	NA	NA	NA	NA	NA	NA	NA	NA
NW_019170544.1	9469145	C	T	ENSAMXT00000000235	ENSAMXG00000000221	grhl2a	CDS	SYNONYMOUS	F	F	202	1	2.59	363	novel	TOLERATED
NW_019170544.1	9469154	A	C	ENSAMXT00000000235	ENSAMXG00000000221	grhl2a	CDS	SYNONYMOUS	P	P	205	1	2.6	361	novel	TOLERATED
NW_019170544.1	9469160	C	T	ENSAMXT00000000235	ENSAMXG00000000221	grhl2a	CDS	SYNONYMOUS	S	S	207	1	2.58	369	novel	TOLERATED
NW_019170544.1	9469165	C	G	ENSAMXT00000000235	ENSAMXG00000000221	grhl2a	CDS	NONSYNONYMOUS	A	G	209	0.75	2.56	364	novel	TOLERATED
NW_019170544.1	9469180	T	C	ENSAMXT00000000235	ENSAMXG00000000221	grhl2a	CDS	NONSYNONYMOUS	L	P	214	0.3	2.64	341	novel	TOLERATED
NW_019170544.1	9469187	A	G	ENSAMXT00000000235	ENSAMXG00000000221	grhl2a	CDS	SYNONYMOUS	Q	Q	216	0.29	2.59	364	novel	TOLERATED
NW_019170544.1	9469194	C	T	ENSAMXT00000000235	ENSAMXG00000000221	grhl2a	CDS	NONSYNONYMOUS	P	S	219	0.46	2.56	358	novel	TOLERATED
NW_019170544.1	9469301	A	T	ENSAMXT00000000235	ENSAMXG00000000221	grhl2a	CDS	SYNONYMOUS	V	V	220	0.77	2.54	343	novel	TOLERATED
NW_019170544.1	9469306	C	G	ENSAMXT00000000235	ENSAMXG00000000221	grhl2a	CDS	NONSYNONYMOUS	T	S	222	1	2.57	376	novel	TOLERATED
NW_019170544.1	9469343	C	G	ENSAMXT00000000235	ENSAMXG00000000221	grhl2a	CDS	SYNONYMOUS	R	R	234	1	2.57	387	novel	TOLERATED
NW_019170544.1	9469390	A	T	ENSAMXT00000000235	ENSAMXG00000000221	grhl2a	CDS	NONSYNONYMOUS	Y	F	250	1	2.54	389	novel	TOLERATED
NW_019170544.1	9469395	A	G	ENSAMXT00000000235	ENSAMXG00000000221	grhl2a	CDS	NONSYNONYMOUS	S	G	252	0.08	2.55	390	novel	TOLERATED
NW_019170544.1	9469396	G	A	ENSAMXT00000000235	ENSAMXG00000000221	grhl2a	CDS	NONSYNONYMOUS	S	N	252	0.01	2.55	390	novel	DELETERIOUS
NW_019170544.1	9469414	C	T	ENSAMXT00000000235	ENSAMXG00000000221	grhl2a	CDS	NONSYNONYMOUS	S	L	258	0.51	2.54	389	novel	TOLERATED
NW_019170544.1	9469430	T	C	ENSAMXT00000000235	ENSAMXG00000000221	grhl2a	CDS	SYNONYMOUS	G	G	263	1	2.56	386	novel	TOLERATED
NW_019170544.1	9469455	C	T	ENSAMXT00000000235	ENSAMXG00000000221	grhl2a	CDS	NONSYNONYMOUS	R	W	272	0	2.57	390	novel	DELETERIOUS
NW_019170544.1	9469863	G	T	ENSAMXT00000000235	ENSAMXG00000000221	grhl2a	CDS	SYNONYMOUS	V	V	277	1	2.54	395	novel	TOLERATED
NW_019170544.1	9469866	T	G	ENSAMXT00000000235	ENSAMXG00000000221	grhl2a	CDS	SYNONYMOUS	V	V	278	1	2.54	395	novel	TOLERATED
NW_019170544.1	9469878	T	A	ENSAMXT00000000235	ENSAMXG00000000221	grhl2a	CDS	NONSYNONYMOUS	D	E	282	0.55	2.55	394	novel	TOLERATED
NW_019170544.1	9469887	A	G	ENSAMXT00000000235	ENSAMXG00000000221	grhl2a	CDS	SYNONYMOUS	R	R	285	1	2.54	395	novel	TOLERATED
NW_019170544.1	9469890	C	T	ENSAMXT00000000235	ENSAMXG00000000221	grhl2a	CDS	SYNONYMOUS	D	D	286	1	2.57	394	novel	TOLERATED
NW_019170544.1	9469944	A	G	ENSAMXT00000000235	ENSAMXG00000000221	grhl2a	CDS	SYNONYMOUS	Q	Q	304	1	2.54	395	novel	TOLERATED
NW_019170544.1	9471607	C	T	ENSAMXT00000000235	ENSAMXG00000000221	grhl2a	CDS	SYNONYMOUS	D	D	311	1	2.57	396	novel	TOLERATED
NW_019170544.1	9471613	G	A	ENSAMXT00000000235	ENSAMXG00000000221	grhl2a	CDS	SYNONYMOUS	K	K	313	1	2.57	396	novel	TOLERATED
NW_019170544.1	9471616	A	G	ENSAMXT00000000235	ENSAMXG00000000221	grhl2a	CDS	SYNONYMOUS	E	E	314	1	2.55	397	novel	TOLERATED
NW_019170544.1	9471625	T	C	ENSAMXT00000000235	ENSAMXG00000000221	grhl2a	CDS	SYNONYMOUS	N	N	317	1	2.61	386	novel	TOLERATED
NW_019170544.1	9471628	C	G	ENSAMXT00000000235	ENSAMXG00000000221	grhl2a	CDS	SYNONYMOUS	T	T	318	1	2.57	394	novel	TOLERATED
NW_019170544.1	9471631	T	C	ENSAMXT00000000235	ENSAMXG00000000221	grhl2a	CDS	SYNONYMOUS	I	I	319	1	2.57	395	novel	TOLERATED
NW_019170544.1	9471638	C	G	ENSAMXT00000000235	ENSAMXG00000000221	grhl2a	CDS	NONSYNONYMOUS	L	V	322	0.34	2.55	397	novel	TOLERATED
NW_019170544.1	9471640	T	G	ENSAMXT00000000235	ENSAMXG00000000221	grhl2a	CDS	SYNONYMOUS	L	L	322	0.05	2.55	397	novel	TOLERATED
NW_019170544.1	9471649	C	T	ENSAMXT00000000235	ENSAMXG00000000221	grhl2a	CDS	SYNONYMOUS	I	I	325	1	2.55	397	novel	TOLERATED
NW_019170544.1	9471664	C	T	ENSAMXT00000000235	ENSAMXG00000000221	grhl2a	CDS	SYNONYMOUS	V	V	330	0.96	2.54	396	novel	TOLERATED
NW_019170544.1	9471664	C	G	ENSAMXT00000000235	ENSAMXG00000000221	grhl2a	CDS	SYNONYMOUS	V	V	330	0.96	2.54	396	novel	TOLERATED
NW_019170544.1	9471673	C	A	ENSAMXT00000000235	ENSAMXG00000000221	grhl2a	CDS	SYNONYMOUS	T	T	333	1	2.54	396	novel	TOLERATED
NW_019170544.1	9471679	T	C	ENSAMXT00000000235	ENSAMXG00000000221	grhl2a	CDS	SYNONYMOUS	D	D	335	1	2.56	395	novel	TOLERATED
NW_019170544.1	9471682	T	C	ENSAMXT00000000235	ENSAMXG00000000221	grhl2a	CDS	SYNONYMOUS	V	V	336	1	2.57	392	novel	TOLERATED
NW_019170544.1	9473359	G	A	ENSAMXT00000000235	ENSAMXG00000000221	grhl2a	CDS	SYNONYMOUS	V	V	346	1	2.55	384	novel	TOLERATED
NW_019170544.1	9473364	G	C	ENSAMXT00000000235	ENSAMXG00000000221	grhl2a	CDS	NONSYNONYMOUS	C	S	348	0.11	2.55	384	novel	TOLERATED
NW_019170544.1	9473377	C	T	ENSAMXT00000000235	ENSAMXG00000000221	grhl2a	CDS	SYNONYMOUS	D	D	352	1	2.55	383	novel	TOLERATED
NW_019170544.1	9473404	G	A	ENSAMXT00000000235	ENSAMXG00000000221	grhl2a	CDS	SYNONYMOUS	G	G	361	1	2.56	381	novel	TOLERATED
NW_019170544.1	9473425	C	A	ENSAMXT00000000235	ENSAMXG00000000221	grhl2a	CDS	SYNONYMOUS	I	I	368	1	2.56	382	novel	TOLERATED
NW_019170544.1	9473425	C	T	ENSAMXT00000000235	ENSAMXG00000000221	grhl2a	CDS	SYNONYMOUS	I	I	368	1	2.56	382	novel	TOLERATED
NW_019170544.1	9473441	A	G	ENSAMXT00000000235	ENSAMXG00000000221	grhl2a	CDS	NONSYNONYMOUS	N	D	374	0.03	2.56	383	novel	DELETERIOUS
NW_019170544.1	9473461	T	C	ENSAMXT00000000235	ENSAMXG00000000221	grhl2a	CDS	SYNONYMOUS	P	P	380	1	2.57	383	novel	TOLERATED
NW_019170544.1	9474114	G	A	ENSAMXT00000000235	ENSAMXG00000000221	grhl2a	CDS	SYNONYMOUS	G	G	395	1	2.55	373	novel	TOLERATED
NW_019170544.1	9474138	A	G	ENSAMXT00000000235	ENSAMXG00000000221	grhl2a	CDS	SYNONYMOUS	E	E	403	1	2.57	376	novel	TOLERATED
NW_019170544.1	9474143	A	G	ENSAMXT00000000235	ENSAMXG00000000221	grhl2a	CDS	NONSYNONYMOUS	K	R	405	1	2.57	376	novel	TOLERATED
NW_019170544.1	9474155	G	T	ENSAMXT00000000235	ENSAMXG00000000221	grhl2a	CDS	NONSYNONYMOUS	R	L	409	0	2.56	372	novel	DELETERIOUS
NW_019170544.1	9474156	G	C	ENSAMXT00000000235	ENSAMXG00000000221	grhl2a	CDS	SYNONYMOUS	R	R	409	1	2.56	372	novel	TOLERATED
NW_019170544.1	9474160	A	C	ENSAMXT00000000235	ENSAMXG00000000221	grhl2a	CDS	NONSYNONYMOUS	K	Q	411	0.01	2.56	357	novel	DELETERIOUS
NW_019170544.1	9475375	C	A	ENSAMXT00000000235	ENSAMXG00000000221	grhl2a	CDS	NONSYNONYMOUS	D	E	426	0.73	2.59	234	novel	TOLERATED
NW_019170544.1	9475390	A	T	ENSAMXT00000000235	ENSAMXG00000000221	grhl2a	CDS	SYNONYMOUS	A	A	431	0.79	2.59	301	novel	TOLERATED
NW_019170544.1	9475395	C	T	ENSAMXT00000000235	ENSAMXG00000000221	grhl2a	CDS	NONSYNONYMOUS	A	V	433	0.5	2.66	242	novel	TOLERATED
NW_019170544.1	9475396	G	A	ENSAMXT00000000235	ENSAMXG00000000221	grhl2a	CDS	SYNONYMOUS	A	A	433	1	2.66	242	novel	TOLERATED
NW_019170544.1	9475402	A	C	ENSAMXT00000000235	ENSAMXG00000000221	grhl2a	CDS	SYNONYMOUS	G	G	435	1	2.68	212	novel	TOLERATED
NW_019170544.1	9475432	G	A	ENSAMXT00000000235	ENSAMXG00000000221	grhl2a	CDS	SYNONYMOUS	T	T	445	1	2.54	368	novel	TOLERATED
NW_019170544.1	9475447	G	C	ENSAMXT00000000235	ENSAMXG00000000221	grhl2a	CDS	NONSYNONYMOUS	M	I	450	0.14	2.55	368	novel	TOLERATED
NW_019170544.1	9475450	G	T	ENSAMXT00000000235	ENSAMXG00000000221	grhl2a	CDS	NONSYNONYMOUS	M	I	451	0.17	2.55	368	novel	TOLERATED
NW_019170544.1	9475454	C	T	ENSAMXT00000000235	ENSAMXG00000000221	grhl2a	CDS	SYNONYMOUS	L	L	453	1	2.54	369	novel	TOLERATED
NW_019170544.1	9475456	G	GAAAA	ENSAMXT00000000235	ENSAMXG00000000221	grhl2a	CDS	FRAMESHIFT INSERTION	NA	NA	NA	NA	NA	NA	NA	NA
NW_019170544.1	9475697	A	G	ENSAMXT00000000235	ENSAMXG00000000221	grhl2a	CDS	SYNONYMOUS	E	E	482	1	2.55	337	novel	TOLERATED
NW_019170544.1	9475699	C	T	ENSAMXT00000000235	ENSAMXG00000000221	grhl2a	CDS	NONSYNONYMOUS	A	V	483	0.47	2.55	334	novel	TOLERATED
NW_019170544.1	9476824	G	A	ENSAMXT00000000235	ENSAMXG00000000221	grhl2a	CDS	NONSYNONYMOUS	V	M	488	0.06	2.59	336	novel	TOLERATED
NW_019170544.1	9476829	A	G	ENSAMXT00000000235	ENSAMXG00000000221	grhl2a	CDS	SYNONYMOUS	V	V	489	0.57	2.59	335	novel	TOLERATED
NW_019170544.1	9476850	C	G	ENSAMXT00000000235	ENSAMXG00000000221	grhl2a	CDS	NONSYNONYMOUS	D	E	496	0.55	2.54	348	novel	TOLERATED
NW_019170544.1	9476859	C	T	ENSAMXT00000000235	ENSAMXG00000000221	grhl2a	CDS	SYNONYMOUS	D	D	499	0.88	2.55	355	novel	TOLERATED
NW_019170544.1	9476869	C	A	ENSAMXT00000000235	ENSAMXG00000000221	grhl2a	CDS	NONSYNONYMOUS	P	T	503	0.04	2.55	352	novel	DELETERIOUS
NW_019170544.1	9476870	C	T	ENSAMXT00000000235	ENSAMXG00000000221	grhl2a	CDS	NONSYNONYMOUS	P	L	503	0.03	2.55	352	novel	DELETERIOUS
NW_019170544.1	9476894	GAA	G	ENSAMXT00000000235	ENSAMXG00000000221	grhl2a	CDS	FRAMESHIFT DELETION	NA	NA	NA	NA	NA	NA	NA	NA
NW_019170544.1	9476901	A	ATG	ENSAMXT00000000235	ENSAMXG00000000221	grhl2a	CDS	FRAMESHIFT INSERTION	NA	NA	NA	NA	NA	NA	NA	NA
NW_019170544.1	9477007	T	C	ENSAMXT00000000235	ENSAMXG00000000221	grhl2a	CDS	SYNONYMOUS	V	V	517	1	2.55	357	novel	TOLERATED
NW_019170544.1	9477019	T	A	ENSAMXT00000000235	ENSAMXG00000000221	grhl2a	CDS	SYNONYMOUS	V	V	521	1	2.55	356	novel	TOLERATED
NW_019170544.1	9477030	C	T	ENSAMXT00000000235	ENSAMXG00000000221	grhl2a	CDS	NONSYNONYMOUS	A	V	525	0.01	2.55	355	novel	DELETERIOUS
NW_019170544.1	9477073	G	C	ENSAMXT00000000235	ENSAMXG00000000221	grhl2a	CDS	SYNONYMOUS	V	V	539	0.26	2.54	354	novel	TOLERATED
NW_019170544.1	9477191	T	C	ENSAMXT00000000235	ENSAMXG00000000221	grhl2a	CDS	SYNONYMOUS	Y	Y	550	1	2.56	346	novel	TOLERATED
NW_019170544.1	9477200	A	C	ENSAMXT00000000235	ENSAMXG00000000221	grhl2a	CDS	SYNONYMOUS	P	P	553	1	2.56	346	novel	TOLERATED
NW_019170544.1	9477209	G	A	ENSAMXT00000000235	ENSAMXG00000000221	grhl2a	CDS	SYNONYMOUS	R	R	556	0.26	2.55	344	novel	TOLERATED
NW_019170544.1	9477219	A	G	ENSAMXT00000000235	ENSAMXG00000000221	grhl2a	CDS	NONSYNONYMOUS	I	V	560	1	2.55	343	novel	TOLERATED
NW_019170544.1	9477221	C	T	ENSAMXT00000000235	ENSAMXG00000000221	grhl2a	CDS	SYNONYMOUS	I	I	560	0.47	2.55	343	novel	TOLERATED
NW_019170544.1	9477233	T	C	ENSAMXT00000000235	ENSAMXG00000000221	grhl2a	CDS	SYNONYMOUS	S	S	564	0.89	2.55	343	novel	TOLERATED
NW_019170544.1	9477551	T	C	ENSAMXT00000000235	ENSAMXG00000000221	grhl2a	CDS	SYNONYMOUS	N	N	582	1	2.55	332	novel	TOLERATED
NW_019170544.1	9477569	T	G	ENSAMXT00000000235	ENSAMXG00000000221	grhl2a	CDS	SYNONYMOUS	L	L	588	1	2.55	332	novel	TOLERATED
NW_019170544.1	9477572	C	T	ENSAMXT00000000235	ENSAMXG00000000221	grhl2a	CDS	SYNONYMOUS	N	N	589	0.81	2.55	332	novel	TOLERATED
NW_019170544.1	9477584	G	A	ENSAMXT00000000235	ENSAMXG00000000221	grhl2a	CDS	SYNONYMOUS	Q	Q	593	0.3	2.55	328	novel	TOLERATED
NW_019170544.1	9477585	A	G	ENSAMXT00000000235	ENSAMXG00000000221	grhl2a	CDS	NONSYNONYMOUS	T	A	594	1	2.55	328	novel	TOLERATED
NW_019170544.1	9477599	C	G	ENSAMXT00000000235	ENSAMXG00000000221	grhl2a	CDS	NONSYNONYMOUS	H	Q	598	0.67	2.61	320	novel	TOLERATED
NW_019170544.1	9477600	G	C	ENSAMXT00000000235	ENSAMXG00000000221	grhl2a	CDS	NONSYNONYMOUS	V	L	599	0.63	2.61	319	novel	TOLERATED
NW_019170544.1	9477608	T	C	ENSAMXT00000000235	ENSAMXG00000000221	grhl2a	CDS	SYNONYMOUS	L	L	601	1	2.61	319	novel	TOLERATED
NW_019170544.1	9477625	C	T	ENSAMXT00000000235	ENSAMXG00000000221	grhl2a	UTR_3	NONCODING	NA	NA	NA	NA	NA	NA	novel	NA
NW_019170544.1	9477631	G	A	ENSAMXT00000000235	ENSAMXG00000000221	grhl2a	UTR_3	NONCODING	NA	NA	NA	NA	NA	NA	novel	NA
NW_019170544.1	9477640	G	T	ENSAMXT00000000235	ENSAMXG00000000221	grhl2a	UTR_3	NONCODING	NA	NA	NA	NA	NA	NA	novel	NA
NW_019170544.1	9477649	G	GA	ENSAMXT00000000235	ENSAMXG00000000221	grhl2a	UTR_3	FRAMESHIFT INSERTION	NA	NA	NA	NA	NA	NA	NA	NA
NW_019170544.1	9477678	CTGTCCTA	C	ENSAMXT00000000235	ENSAMXG00000000221	grhl2a	UTR_3	FRAMESHIFT DELETION	NA	NA	NA	NA	NA	NA	NA	NA
NW_019170544.1	9477689	CCAG	C	ENSAMXT00000000235	ENSAMXG00000000221	grhl2a	UTR_3	NONFRAMESHIFT DELETION	NA	NA	NA	NA	NA	NA	NA	NA
NW_019170544.1	9477694	C	T	ENSAMXT00000000235	ENSAMXG00000000221	grhl2a	UTR_3	NONCODING	NA	NA	NA	NA	NA	NA	novel	NA
NW_019170544.1	9477695	TCAA	T	ENSAMXT00000000235	ENSAMXG00000000221	grhl2a	UTR_3	NONFRAMESHIFT DELETION	NA	NA	NA	NA	NA	NA	NA	NA
NW_019170544.1	9477698	A	ATTTTT	ENSAMXT00000000235	ENSAMXG00000000221	grhl2a	UTR_3	FRAMESHIFT INSERTION	NA	NA	NA	NA	NA	NA	NA	NA
NW_019170544.1	9477703	C	T	ENSAMXT00000000235	ENSAMXG00000000221	grhl2a	UTR_3	NONCODING	NA	NA	NA	NA	NA	NA	novel	NA
NW_019170544.1	9477705	C	T	ENSAMXT00000000235	ENSAMXG00000000221	grhl2a	UTR_3	NONCODING	NA	NA	NA	NA	NA	NA	novel	NA
NW_019170544.1	9477711	T	G	ENSAMXT00000000235	ENSAMXG00000000221	grhl2a	UTR_3	NONCODING	NA	NA	NA	NA	NA	NA	novel	NA
NW_019170544.1	9477717	C	A	ENSAMXT00000000235	ENSAMXG00000000221	grhl2a	UTR_3	NONCODING	NA	NA	NA	NA	NA	NA	novel	NA
NW_019170544.1	9477722	C	T	ENSAMXT00000000235	ENSAMXG00000000221	grhl2a	UTR_3	NONCODING	NA	NA	NA	NA	NA	NA	novel	NA
NW_019170544.1	9477734	G	A	ENSAMXT00000000235	ENSAMXG00000000221	grhl2a	UTR_3	NONCODING	NA	NA	NA	NA	NA	NA	novel	NA
NW_019170544.1	9477735	ATTCTGTAAAAGG	GTTCTGTAAAAGG	ENSAMXT00000000235	ENSAMXG00000000221	grhl2a	UTR_3	SUBSTITUTION	NA	NA	NA	NA	NA	NA	NA	NA
NW_019170544.1	9477735	ATTCTGTAAAAGG	A	ENSAMXT00000000235	ENSAMXG00000000221	grhl2a	UTR_3	NONFRAMESHIFT DELETION	NA	NA	NA	NA	NA	NA	NA	NA
NW_019170544.1	9477740	G	A	ENSAMXT00000000235	ENSAMXG00000000221	grhl2a	UTR_3	NONCODING	NA	NA	NA	NA	NA	NA	novel	NA
NW_019170544.1	9477756	G	A	ENSAMXT00000000235	ENSAMXG00000000221	grhl2a	UTR_3	NONCODING	NA	NA	NA	NA	NA	NA	novel	NA
NW_019170544.1	9477772	A	AC	ENSAMXT00000000235	ENSAMXG00000000221	grhl2a	UTR_3	FRAMESHIFT INSERTION	NA	NA	NA	NA	NA	NA	NA	NA
NW_019170544.1	9477774	T	G	ENSAMXT00000000235	ENSAMXG00000000221	grhl2a	UTR_3	NONCODING	NA	NA	NA	NA	NA	NA	novel	NA
NW_019170544.1	9477775	TCA	T	ENSAMXT00000000235	ENSAMXG00000000221	grhl2a	UTR_3	FRAMESHIFT DELETION	NA	NA	NA	NA	NA	NA	NA	NA
NW_019170544.1	9477780	T	TA	ENSAMXT00000000235	ENSAMXG00000000221	grhl2a	UTR_3	FRAMESHIFT INSERTION	NA	NA	NA	NA	NA	NA	NA	NA
NW_019170544.1	9477783	ACTCT	A	ENSAMXT00000000235	ENSAMXG00000000221	grhl2a	UTR_3	FRAMESHIFT DELETION	NA	NA	NA	NA	NA	NA	NA	NA
NW_019170544.1	9477789	AACTAATGTGTG	A	ENSAMXT00000000235	ENSAMXG00000000221	grhl2a	UTR_3	FRAMESHIFT DELETION	NA	NA	NA	NA	NA	NA	NA	NA
NW_019170544.1	9477800	G	A	ENSAMXT00000000235	ENSAMXG00000000221	grhl2a	UTR_3	NONCODING	NA	NA	NA	NA	NA	NA	novel	NA
NW_019170544.1	9477804	G	GCACTAGCATTTGTCATCCTATGCTAGTGCAAT	ENSAMXT00000000235	ENSAMXG00000000221	grhl2a	UTR_3	FRAMESHIFT INSERTION	NA	NA	NA	NA	NA	NA	NA	NA
NW_019170544.1	9477807	C	A	ENSAMXT00000000235	ENSAMXG00000000221	grhl2a	UTR_3	NONCODING	NA	NA	NA	NA	NA	NA	novel	NA
NW_019170544.1	9477811	C	T	ENSAMXT00000000235	ENSAMXG00000000221	grhl2a	UTR_3	NONCODING	NA	NA	NA	NA	NA	NA	novel	NA
NW_019170544.1	9477812	A	T	ENSAMXT00000000235	ENSAMXG00000000221	grhl2a	UTR_3	NONCODING	NA	NA	NA	NA	NA	NA	novel	NA
NW_019170544.1	9477815	G	A	ENSAMXT00000000235	ENSAMXG00000000221	grhl2a	UTR_3	NONCODING	NA	NA	NA	NA	NA	NA	novel	NA
NW_019170544.1	9477825	T	C	ENSAMXT00000000235	ENSAMXG00000000221	grhl2a	UTR_3	NONCODING	NA	NA	NA	NA	NA	NA	novel	NA
NW_019170544.1	9477826	G	A	ENSAMXT00000000235	ENSAMXG00000000221	grhl2a	UTR_3	NONCODING	NA	NA	NA	NA	NA	NA	novel	NA
NW_019170544.1	9477829	T	A	ENSAMXT00000000235	ENSAMXG00000000221	grhl2a	UTR_3	NONCODING	NA	NA	NA	NA	NA	NA	novel	NA
NW_019170544.1	9477830	C	A	ENSAMXT00000000235	ENSAMXG00000000221	grhl2a	UTR_3	NONCODING	NA	NA	NA	NA	NA	NA	novel	NA
NW_019170544.1	9477841	T	C	ENSAMXT00000000235	ENSAMXG00000000221	grhl2a	UTR_3	NONCODING	NA	NA	NA	NA	NA	NA	novel	NA
NW_019170544.1	9477842	T	G	ENSAMXT00000000235	ENSAMXG00000000221	grhl2a	UTR_3	NONCODING	NA	NA	NA	NA	NA	NA	novel	NA
NW_019170544.1	9477844	T	C	ENSAMXT00000000235	ENSAMXG00000000221	grhl2a	UTR_3	NONCODING	NA	NA	NA	NA	NA	NA	novel	NA
NW_019170544.1	9477847	G	T	ENSAMXT00000000235	ENSAMXG00000000221	grhl2a	UTR_3	NONCODING	NA	NA	NA	NA	NA	NA	novel	NA
NW_019170544.1	9477852	GC	G	ENSAMXT00000000235	ENSAMXG00000000221	grhl2a	UTR_3	FRAMESHIFT DELETION	NA	NA	NA	NA	NA	NA	NA	NA
NW_019170544.1	9477854	T	G	ENSAMXT00000000235	ENSAMXG00000000221	grhl2a	UTR_3	NONCODING	NA	NA	NA	NA	NA	NA	novel	NA
NW_019170544.1	9477856	T	G	ENSAMXT00000000235	ENSAMXG00000000221	grhl2a	UTR_3	NONCODING	NA	NA	NA	NA	NA	NA	novel	NA
NW_019170544.1	9477861	T	C	ENSAMXT00000000235	ENSAMXG00000000221	grhl2a	UTR_3	NONCODING	NA	NA	NA	NA	NA	NA	novel	NA
NW_019170544.1	9477864	G	T	ENSAMXT00000000235	ENSAMXG00000000221	grhl2a	UTR_3	NONCODING	NA	NA	NA	NA	NA	NA	novel	NA
NW_019170544.1	9477870	T	C	ENSAMXT00000000235	ENSAMXG00000000221	grhl2a	UTR_3	NONCODING	NA	NA	NA	NA	NA	NA	novel	NA
NW_019170544.1	9477877	C	G	ENSAMXT00000000235	ENSAMXG00000000221	grhl2a	UTR_3	NONCODING	NA	NA	NA	NA	NA	NA	novel	NA
NW_019170544.1	9477879	C	T	ENSAMXT00000000235	ENSAMXG00000000221	grhl2a	UTR_3	NONCODING	NA	NA	NA	NA	NA	NA	novel	NA
NW_019170544.1	9477881	G	C	ENSAMXT00000000235	ENSAMXG00000000221	grhl2a	UTR_3	NONCODING	NA	NA	NA	NA	NA	NA	novel	NA
NW_019170544.1	9477901	A	G	ENSAMXT00000000235	ENSAMXG00000000221	grhl2a	UTR_3	NONCODING	NA	NA	NA	NA	NA	NA	novel	NA
NW_019170544.1	9477902	G	A	ENSAMXT00000000235	ENSAMXG00000000221	grhl2a	UTR_3	NONCODING	NA	NA	NA	NA	NA	NA	novel	NA
NW_019170544.1	9477903	G	A	ENSAMXT00000000235	ENSAMXG00000000221	grhl2a	UTR_3	NONCODING	NA	NA	NA	NA	NA	NA	novel	NA
NW_019170544.1	9477908	C	T	ENSAMXT00000000235	ENSAMXG00000000221	grhl2a	UTR_3	NONCODING	NA	NA	NA	NA	NA	NA	novel	NA
NW_019170544.1	9477909	A	G	ENSAMXT00000000235	ENSAMXG00000000221	grhl2a	UTR_3	NONCODING	NA	NA	NA	NA	NA	NA	novel	NA
NW_019170544.1	9477911	C	T	ENSAMXT00000000235	ENSAMXG00000000221	grhl2a	UTR_3	NONCODING	NA	NA	NA	NA	NA	NA	novel	NA
NW_019170544.1	9477913	A	T	ENSAMXT00000000235	ENSAMXG00000000221	grhl2a	UTR_3	NONCODING	NA	NA	NA	NA	NA	NA	novel	NA
NW_019170544.1	9477914	G	T	ENSAMXT00000000235	ENSAMXG00000000221	grhl2a	UTR_3	NONCODING	NA	NA	NA	NA	NA	NA	novel	NA
NW_019170544.1	9477918	C	T	ENSAMXT00000000235	ENSAMXG00000000221	grhl2a	UTR_3	NONCODING	NA	NA	NA	NA	NA	NA	novel	NA
NW_019170544.1	9477919	T	G	ENSAMXT00000000235	ENSAMXG00000000221	grhl2a	UTR_3	NONCODING	NA	NA	NA	NA	NA	NA	novel	NA
NW_019170544.1	9477924	A	G	ENSAMXT00000000235	ENSAMXG00000000221	grhl2a	UTR_3	NONCODING	NA	NA	NA	NA	NA	NA	novel	NA
NW_019170544.1	9477927	A	G	ENSAMXT00000000235	ENSAMXG00000000221	grhl2a	UTR_3	NONCODING	NA	NA	NA	NA	NA	NA	novel	NA
NW_019170544.1	9477931	GT	G	ENSAMXT00000000235	ENSAMXG00000000221	grhl2a	UTR_3	FRAMESHIFT DELETION	NA	NA	NA	NA	NA	NA	NA	NA
NW_019170544.1	9477936	C	CTT	ENSAMXT00000000235	ENSAMXG00000000221	grhl2a	UTR_3	FRAMESHIFT INSERTION	NA	NA	NA	NA	NA	NA	NA	NA
NW_019170544.1	9477939	T	C	ENSAMXT00000000235	ENSAMXG00000000221	grhl2a	UTR_3	NONCODING	NA	NA	NA	NA	NA	NA	novel	NA
NW_019170544.1	9477951	C	T	ENSAMXT00000000235	ENSAMXG00000000221	grhl2a	UTR_3	NONCODING	NA	NA	NA	NA	NA	NA	novel	NA
NW_019170544.1	9477954	C	T	ENSAMXT00000000235	ENSAMXG00000000221	grhl2a	UTR_3	NONCODING	NA	NA	NA	NA	NA	NA	novel	NA
NW_019170544.1	9477955	A	AT	ENSAMXT00000000235	ENSAMXG00000000221	grhl2a	UTR_3	FRAMESHIFT INSERTION	NA	NA	NA	NA	NA	NA	NA	NA
NW_019170544.1	9477958	A	G	ENSAMXT00000000235	ENSAMXG00000000221	grhl2a	UTR_3	NONCODING	NA	NA	NA	NA	NA	NA	novel	NA
NW_019170544.1	9477960	G	A	ENSAMXT00000000235	ENSAMXG00000000221	grhl2a	UTR_3	NONCODING	NA	NA	NA	NA	NA	NA	novel	NA
NW_019170544.1	9477969	G	A	ENSAMXT00000000235	ENSAMXG00000000221	grhl2a	UTR_3	NONCODING	NA	NA	NA	NA	NA	NA	novel	NA
NW_019170544.1	9477971	A	T	ENSAMXT00000000235	ENSAMXG00000000221	grhl2a	UTR_3	NONCODING	NA	NA	NA	NA	NA	NA	novel	NA
NW_019170544.1	9477972	TCG	T	ENSAMXT00000000235	ENSAMXG00000000221	grhl2a	UTR_3	FRAMESHIFT DELETION	NA	NA	NA	NA	NA	NA	NA	NA
NW_019170544.1	9477986	G	A	ENSAMXT00000000235	ENSAMXG00000000221	grhl2a	UTR_3	NONCODING	NA	NA	NA	NA	NA	NA	novel	NA
NW_019170544.1	9477990	TAGAGC	T	ENSAMXT00000000235	ENSAMXG00000000221	grhl2a	UTR_3	FRAMESHIFT DELETION	NA	NA	NA	NA	NA	NA	NA	NA
NW_019170544.1	9477990	TAGAGC	AAGAGC	ENSAMXT00000000235	ENSAMXG00000000221	grhl2a	UTR_3	SUBSTITUTION	NA	NA	NA	NA	NA	NA	NA	NA
NW_019170544.1	9477998	CCCGAT	C	ENSAMXT00000000235	ENSAMXG00000000221	grhl2a	UTR_3	FRAMESHIFT DELETION	NA	NA	NA	NA	NA	NA	NA	NA
NW_019170544.1	9478007	A	AT	ENSAMXT00000000235	ENSAMXG00000000221	grhl2a	UTR_3	FRAMESHIFT INSERTION	NA	NA	NA	NA	NA	NA	NA	NA
NW_019170544.1	9478011	T	C	ENSAMXT00000000235	ENSAMXG00000000221	grhl2a	UTR_3	NONCODING	NA	NA	NA	NA	NA	NA	novel	NA
NW_019170544.1	9478013	T	C	ENSAMXT00000000235	ENSAMXG00000000221	grhl2a	UTR_3	NONCODING	NA	NA	NA	NA	NA	NA	novel	NA
NW_019170544.1	9478027	AAAGCAAGTAT	A	ENSAMXT00000000235	ENSAMXG00000000221	grhl2a	UTR_3	FRAMESHIFT DELETION	NA	NA	NA	NA	NA	NA	NA	NA
NW_019170544.1	9478047	T	A	ENSAMXT00000000235	ENSAMXG00000000221	grhl2a	UTR_3	NONCODING	NA	NA	NA	NA	NA	NA	novel	NA
NW_019170544.1	9478057	G	A	ENSAMXT00000000235	ENSAMXG00000000221	grhl2a	UTR_3	NONCODING	NA	NA	NA	NA	NA	NA	novel	NA
NW_019170544.1	9478060	G	A	ENSAMXT00000000235	ENSAMXG00000000221	grhl2a	UTR_3	NONCODING	NA	NA	NA	NA	NA	NA	novel	NA
NW_019170544.1	9478073	G	A	ENSAMXT00000000235	ENSAMXG00000000221	grhl2a	UTR_3	NONCODING	NA	NA	NA	NA	NA	NA	novel	NA
NW_019170544.1	9478085	C	CT	ENSAMXT00000000235	ENSAMXG00000000221	grhl2a	UTR_3	FRAMESHIFT INSERTION	NA	NA	NA	NA	NA	NA	NA	NA
NW_019170544.1	9478085	C	T	ENSAMXT00000000235	ENSAMXG00000000221	grhl2a	UTR_3	NONCODING	NA	NA	NA	NA	NA	NA	novel	NA
NW_019170544.1	9478089	T	A	ENSAMXT00000000235	ENSAMXG00000000221	grhl2a	UTR_3	NONCODING	NA	NA	NA	NA	NA	NA	novel	NA
NW_019170544.1	9478090	G	A	ENSAMXT00000000235	ENSAMXG00000000221	grhl2a	UTR_3	NONCODING	NA	NA	NA	NA	NA	NA	novel	NA
NW_019170544.1	9478099	A	AC	ENSAMXT00000000235	ENSAMXG00000000221	grhl2a	UTR_3	FRAMESHIFT INSERTION	NA	NA	NA	NA	NA	NA	NA	NA
NW_019170544.1	9478099	A	G	ENSAMXT00000000235	ENSAMXG00000000221	grhl2a	UTR_3	NONCODING	NA	NA	NA	NA	NA	NA	novel	NA
NW_019170544.1	9478101	A	C	ENSAMXT00000000235	ENSAMXG00000000221	grhl2a	UTR_3	NONCODING	NA	NA	NA	NA	NA	NA	novel	NA
NW_019170544.1	9478103	T	C	ENSAMXT00000000235	ENSAMXG00000000221	grhl2a	UTR_3	NONCODING	NA	NA	NA	NA	NA	NA	novel	NA
NW_019170544.1	9478107	A	AC	ENSAMXT00000000235	ENSAMXG00000000221	grhl2a	UTR_3	FRAMESHIFT INSERTION	NA	NA	NA	NA	NA	NA	NA	NA
NW_019170544.1	9478110	TGA	T	ENSAMXT00000000235	ENSAMXG00000000221	grhl2a	UTR_3	FRAMESHIFT DELETION	NA	NA	NA	NA	NA	NA	NA	NA
NW_019170544.1	9478113	A	T	ENSAMXT00000000235	ENSAMXG00000000221	grhl2a	UTR_3	NONCODING	NA	NA	NA	NA	NA	NA	novel	NA
NW_019170544.1	9478114	ACAT	A	ENSAMXT00000000235	ENSAMXG00000000221	grhl2a	UTR_3	NONFRAMESHIFT DELETION	NA	NA	NA	NA	NA	NA	NA	NA
NW_019170544.1	9478116	ATTTTAAAGTT	A	ENSAMXT00000000235	ENSAMXG00000000221	grhl2a	UTR_3	FRAMESHIFT DELETION	NA	NA	NA	NA	NA	NA	NA	NA
NW_019170544.1	9478116	ATTTTAAAGTT	ATCTTTTAAAGTT	ENSAMXT00000000235	ENSAMXG00000000221	grhl2a	UTR_3	FRAMESHIFT INSERTION	NA	NA	NA	NA	NA	NA	NA	NA
NW_019170544.1	9478121	AAAGTTTAAAAAATAACAAAAAAGAAAAAGAGACAGAAAAGCACCAAGTGCATCTCTTTCTGAAGGTTT	A	ENSAMXT00000000235	ENSAMXG00000000221	grhl2a	UTR_3	FRAMESHIFT DELETION	NA	NA	NA	NA	NA	NA	NA	NA
NW_019170544.1	9478127	T	G	ENSAMXT00000000235	ENSAMXG00000000221	grhl2a	UTR_3	NONCODING	NA	NA	NA	NA	NA	NA	novel	NA
NW_019170544.1	9478127	T	TA	ENSAMXT00000000235	ENSAMXG00000000221	grhl2a	UTR_3	FRAMESHIFT INSERTION	NA	NA	NA	NA	NA	NA	NA	NA
NW_019170544.1	9478128	A	C	ENSAMXT00000000235	ENSAMXG00000000221	grhl2a	UTR_3	NONCODING	NA	NA	NA	NA	NA	NA	novel	NA
NW_019170544.1	9478137	C	CA	ENSAMXT00000000235	ENSAMXG00000000221	grhl2a	UTR_3	FRAMESHIFT INSERTION	NA	NA	NA	NA	NA	NA	NA	NA
NW_019170544.1	9478145	A	G	ENSAMXT00000000235	ENSAMXG00000000221	grhl2a	UTR_3	NONCODING	NA	NA	NA	NA	NA	NA	novel	NA
NW_019170544.1	9478147	AAAGAGACAGAAAAGCACCAAGTGCATCTCTTTCTG	A	ENSAMXT00000000235	ENSAMXG00000000221	grhl2a	UTR_3	FRAMESHIFT DELETION	NA	NA	NA	NA	NA	NA	NA	NA
NW_019170544.1	9478149	A	T	ENSAMXT00000000235	ENSAMXG00000000221	grhl2a	UTR_3	NONCODING	NA	NA	NA	NA	NA	NA	novel	NA
NW_019170544.1	9478153	AC	A	ENSAMXT00000000235	ENSAMXG00000000221	grhl2a	UTR_3	FRAMESHIFT DELETION	NA	NA	NA	NA	NA	NA	NA	NA
NW_019170544.1	9478156	GAAA	G	ENSAMXT00000000235	ENSAMXG00000000221	grhl2a	UTR_3	NONFRAMESHIFT DELETION	NA	NA	NA	NA	NA	NA	NA	NA
NW_019170544.1	9478179	T	C	ENSAMXT00000000235	ENSAMXG00000000221	grhl2a	UTR_3	NONCODING	NA	NA	NA	NA	NA	NA	novel	NA
NW_019170544.1	9478189	TC	T	ENSAMXT00000000235	ENSAMXG00000000221	grhl2a	UTR_3	FRAMESHIFT DELETION	NA	NA	NA	NA	NA	NA	NA	NA
NW_019170544.1	9478190	C	A	ENSAMXT00000000235	ENSAMXG00000000221	grhl2a	UTR_3	NONCODING	NA	NA	NA	NA	NA	NA	novel	NA
NW_019170544.1	9478200	T	C	ENSAMXT00000000235	ENSAMXG00000000221	grhl2a	UTR_3	NONCODING	NA	NA	NA	NA	NA	NA	novel	NA
NW_019170544.1	9478205	T	TAGTAATATAAGATGTTCCTAGAGAACATCTTATATTACTAGAAA	ENSAMXT00000000235	ENSAMXG00000000221	grhl2a	UTR_3	FRAMESHIFT INSERTION	NA	NA	NA	NA	NA	NA	NA	NA
NW_019170544.1	9478207	G	A	ENSAMXT00000000235	ENSAMXG00000000221	grhl2a	UTR_3	NONCODING	NA	NA	NA	NA	NA	NA	novel	NA
NW_019170544.1	9478208	T	C	ENSAMXT00000000235	ENSAMXG00000000221	grhl2a	UTR_3	NONCODING	NA	NA	NA	NA	NA	NA	novel	NA
NW_019170544.1	9478219	G	A	ENSAMXT00000000235	ENSAMXG00000000221	grhl2a	UTR_3	NONCODING	NA	NA	NA	NA	NA	NA	novel	NA
NW_019170544.1	9478220	T	G	ENSAMXT00000000235	ENSAMXG00000000221	grhl2a	UTR_3	NONCODING	NA	NA	NA	NA	NA	NA	novel	NA
NW_019170544.1	9478223	T	G	ENSAMXT00000000235	ENSAMXG00000000221	grhl2a	UTR_3	NONCODING	NA	NA	NA	NA	NA	NA	novel	NA
NW_019170544.1	9478227	G	A	ENSAMXT00000000235	ENSAMXG00000000221	grhl2a	UTR_3	NONCODING	NA	NA	NA	NA	NA	NA	novel	NA
NW_019170544.1	9478227	G	T	ENSAMXT00000000235	ENSAMXG00000000221	grhl2a	UTR_3	NONCODING	NA	NA	NA	NA	NA	NA	novel	NA
NW_019170544.1	9478228	G	T	ENSAMXT00000000235	ENSAMXG00000000221	grhl2a	UTR_3	NONCODING	NA	NA	NA	NA	NA	NA	novel	NA
NW_019170544.1	9478239	T	G	ENSAMXT00000000235	ENSAMXG00000000221	grhl2a	UTR_3	NONCODING	NA	NA	NA	NA	NA	NA	novel	NA
NW_019170544.1	9478241	GT	G	ENSAMXT00000000235	ENSAMXG00000000221	grhl2a	UTR_3	FRAMESHIFT DELETION	NA	NA	NA	NA	NA	NA	NA	NA
NW_019170544.1	9478254	C	T	ENSAMXT00000000235	ENSAMXG00000000221	grhl2a	UTR_3	NONCODING	NA	NA	NA	NA	NA	NA	novel	NA
NW_019170544.1	9478257	C	CTTG	ENSAMXT00000000235	ENSAMXG00000000221	grhl2a	UTR_3	NONFRAMESHIFT INSERTION	NA	NA	NA	NA	NA	NA	NA	NA
NW_019170544.1	9478266	CACA	C	ENSAMXT00000000235	ENSAMXG00000000221	grhl2a	UTR_3	NONFRAMESHIFT DELETION	NA	NA	NA	NA	NA	NA	NA	NA
NW_019170544.1	9478266	CACA	CAACA	ENSAMXT00000000235	ENSAMXG00000000221	grhl2a	UTR_3	FRAMESHIFT INSERTION	NA	NA	NA	NA	NA	NA	NA	NA
NW_019170544.1	9478268	C	A	ENSAMXT00000000235	ENSAMXG00000000221	grhl2a	UTR_3	NONCODING	NA	NA	NA	NA	NA	NA	novel	NA
NW_019170544.1	9478279	A	C	ENSAMXT00000000235	ENSAMXG00000000221	grhl2a	UTR_3	NONCODING	NA	NA	NA	NA	NA	NA	novel	NA
NW_019170544.1	9478283	G	A	ENSAMXT00000000235	ENSAMXG00000000221	grhl2a	UTR_3	NONCODING	NA	NA	NA	NA	NA	NA	novel	NA
NW_019170544.1	9478288	T	A	ENSAMXT00000000235	ENSAMXG00000000221	grhl2a	UTR_3	NONCODING	NA	NA	NA	NA	NA	NA	novel	NA
NW_019170544.1	9478290	C	T	ENSAMXT00000000235	ENSAMXG00000000221	grhl2a	UTR_3	NONCODING	NA	NA	NA	NA	NA	NA	novel	NA
NW_019170544.1	9478291	GTAA	G	ENSAMXT00000000235	ENSAMXG00000000221	grhl2a	UTR_3	NONFRAMESHIFT DELETION	NA	NA	NA	NA	NA	NA	NA	NA
NW_019170544.1	9478291	GTAA	TTAA	ENSAMXT00000000235	ENSAMXG00000000221	grhl2a	UTR_3	SUBSTITUTION	NA	NA	NA	NA	NA	NA	NA	NA
NW_019170544.1	9478292	T	C	ENSAMXT00000000235	ENSAMXG00000000221	grhl2a	UTR_3	NONCODING	NA	NA	NA	NA	NA	NA	novel	NA
NW_019170544.1	9478296	A	C	ENSAMXT00000000235	ENSAMXG00000000221	grhl2a	UTR_3	NONCODING	NA	NA	NA	NA	NA	NA	novel	NA
NW_019170544.1	9478309	G	A	ENSAMXT00000000235	ENSAMXG00000000221	grhl2a	UTR_3	NONCODING	NA	NA	NA	NA	NA	NA	novel	NA
NW_019170544.1	9478348	A	G	ENSAMXT00000000235	ENSAMXG00000000221	grhl2a	UTR_3	NONCODING	NA	NA	NA	NA	NA	NA	novel	NA
NW_019170544.1	9478351	G	T	ENSAMXT00000000235	ENSAMXG00000000221	grhl2a	UTR_3	NONCODING	NA	NA	NA	NA	NA	NA	novel	NA
NW_019170544.1	9478353	GT	G	ENSAMXT00000000235	ENSAMXG00000000221	grhl2a	UTR_3	FRAMESHIFT DELETION	NA	NA	NA	NA	NA	NA	NA	NA
NW_019170544.1	9478376	G	T	ENSAMXT00000000235	ENSAMXG00000000221	grhl2a	UTR_3	NONCODING	NA	NA	NA	NA	NA	NA	novel	NA
NW_019170544.1	9478397	AAT	A	ENSAMXT00000000235	ENSAMXG00000000221	grhl2a	UTR_3	FRAMESHIFT DELETION	NA	NA	NA	NA	NA	NA	NA	NA
NW_019170544.1	9478429	A	G	ENSAMXT00000000235	ENSAMXG00000000221	grhl2a	UTR_3	NONCODING	NA	NA	NA	NA	NA	NA	novel	NA
NW_019170544.1	9478430	A	C	ENSAMXT00000000235	ENSAMXG00000000221	grhl2a	UTR_3	NONCODING	NA	NA	NA	NA	NA	NA	novel	NA
NW_019170544.1	9478445	T	A	ENSAMXT00000000235	ENSAMXG00000000221	grhl2a	UTR_3	NONCODING	NA	NA	NA	NA	NA	NA	novel	NA
NW_019170544.1	9478515	C	CAA	ENSAMXT00000000235	ENSAMXG00000000221	grhl2a	UTR_3	FRAMESHIFT INSERTION	NA	NA	NA	NA	NA	NA	NA	NA
NW_019170544.1	9478533	T	A	ENSAMXT00000000235	ENSAMXG00000000221	grhl2a	UTR_3	NONCODING	NA	NA	NA	NA	NA	NA	novel	NA
NW_019170544.1	9478538	C	A	ENSAMXT00000000235	ENSAMXG00000000221	grhl2a	UTR_3	NONCODING	NA	NA	NA	NA	NA	NA	novel	NA
NW_019170544.1	9478545	C	CT	ENSAMXT00000000235	ENSAMXG00000000221	grhl2a	UTR_3	FRAMESHIFT INSERTION	NA	NA	NA	NA	NA	NA	NA	NA
NW_019170544.1	9478545	C	G	ENSAMXT00000000235	ENSAMXG00000000221	grhl2a	UTR_3	NONCODING	NA	NA	NA	NA	NA	NA	novel	NA
NW_019170544.1	9478566	AAAT	A	ENSAMXT00000000235	ENSAMXG00000000221	grhl2a	UTR_3	NONFRAMESHIFT DELETION	NA	NA	NA	NA	NA	NA	NA	NA
NW_019170544.1	9478572	TAA	T	ENSAMXT00000000235	ENSAMXG00000000221	grhl2a	UTR_3	FRAMESHIFT DELETION	NA	NA	NA	NA	NA	NA	NA	NA
NW_019170544.1	9478576	A	T	ENSAMXT00000000235	ENSAMXG00000000221	grhl2a	UTR_3	NONCODING	NA	NA	NA	NA	NA	NA	novel	NA
NW_019170544.1	9478585	T	G	ENSAMXT00000000235	ENSAMXG00000000221	grhl2a	UTR_3	NONCODING	NA	NA	NA	NA	NA	NA	novel	NA
NW_019170544.1	9478586	A	T	ENSAMXT00000000235	ENSAMXG00000000221	grhl2a	UTR_3	NONCODING	NA	NA	NA	NA	NA	NA	novel	NA
NW_019170544.1	9478590	T	A	ENSAMXT00000000235	ENSAMXG00000000221	grhl2a	UTR_3	NONCODING	NA	NA	NA	NA	NA	NA	novel	NA
NW_019170544.1	9478591	ATT	A	ENSAMXT00000000235	ENSAMXG00000000221	grhl2a	UTR_3	FRAMESHIFT DELETION	NA	NA	NA	NA	NA	NA	NA	NA
NW_019170544.1	9478591	ATT	AT	ENSAMXT00000000235	ENSAMXG00000000221	grhl2a	UTR_3	FRAMESHIFT DELETION	NA	NA	NA	NA	NA	NA	NA	NA
NW_019170544.1	9478599	C	T	ENSAMXT00000000235	ENSAMXG00000000221	grhl2a	UTR_3	NONCODING	NA	NA	NA	NA	NA	NA	novel	NA
NW_019170544.1	9478601	C	A	ENSAMXT00000000235	ENSAMXG00000000221	grhl2a	UTR_3	NONCODING	NA	NA	NA	NA	NA	NA	novel	NA
NW_019170544.1	9478606	T	C	ENSAMXT00000000235	ENSAMXG00000000221	grhl2a	UTR_3	NONCODING	NA	NA	NA	NA	NA	NA	novel	NA
NW_019170544.1	9478612	T	C	ENSAMXT00000000235	ENSAMXG00000000221	grhl2a	UTR_3	NONCODING	NA	NA	NA	NA	NA	NA	novel	NA
NW_019170544.1	9478624	G	A	ENSAMXT00000000235	ENSAMXG00000000221	grhl2a	UTR_3	NONCODING	NA	NA	NA	NA	NA	NA	novel	NA
NW_019170544.1	9478634	G	A	ENSAMXT00000000235	ENSAMXG00000000221	grhl2a	UTR_3	NONCODING	NA	NA	NA	NA	NA	NA	novel	NA
NW_019170544.1	9478651	G	A	ENSAMXT00000000235	ENSAMXG00000000221	grhl2a	UTR_3	NONCODING	NA	NA	NA	NA	NA	NA	novel	NA
NW_019170544.1	9478713	GA	GAA	ENSAMXT00000000235	ENSAMXG00000000221	grhl2a	UTR_3	FRAMESHIFT INSERTION	NA	NA	NA	NA	NA	NA	NA	NA
NW_019170544.1	9478713	GA	G	ENSAMXT00000000235	ENSAMXG00000000221	grhl2a	UTR_3	FRAMESHIFT DELETION	NA	NA	NA	NA	NA	NA	NA	NA
NW_019170544.1	9478744	G	T	ENSAMXT00000000235	ENSAMXG00000000221	grhl2a	UTR_3	NONCODING	NA	NA	NA	NA	NA	NA	novel	NA
NW_019170544.1	9478752	T	A	ENSAMXT00000000235	ENSAMXG00000000221	grhl2a	UTR_3	NONCODING	NA	NA	NA	NA	NA	NA	novel	NA
NW_019170544.1	9478762	C	T	ENSAMXT00000000235	ENSAMXG00000000221	grhl2a	UTR_3	NONCODING	NA	NA	NA	NA	NA	NA	novel	NA
NW_019170544.1	9478763	T	TCCAAATGTAATAATGTTCACCTGAAGGTGAACATTATTACATTTGGAGTGATTCCTAAATCAAC	ENSAMXT00000000235	ENSAMXG00000000221	grhl2a	UTR_3	FRAMESHIFT INSERTION	NA	NA	NA	NA	NA	NA	NA	NA
NW_019170544.1	9478766	A	C	ENSAMXT00000000235	ENSAMXG00000000221	grhl2a	UTR_3	NONCODING	NA	NA	NA	NA	NA	NA	novel	NA
NW_019170544.1	9478767	A	G	ENSAMXT00000000235	ENSAMXG00000000221	grhl2a	UTR_3	NONCODING	NA	NA	NA	NA	NA	NA	novel	NA
NW_019170544.1	9478776	ATGTTCACCTTCAGG	A	ENSAMXT00000000235	ENSAMXG00000000221	grhl2a	UTR_3	FRAMESHIFT DELETION	NA	NA	NA	NA	NA	NA	NA	NA
NW_019170544.1	9478793	G	C	ENSAMXT00000000235	ENSAMXG00000000221	grhl2a	UTR_3	NONCODING	NA	NA	NA	NA	NA	NA	novel	NA
NW_019170544.1	9478803	TATCTTATAGGTAGAGTCCCCGGGAACAGTTTTCTCA	T	ENSAMXT00000000235	ENSAMXG00000000221	grhl2a	UTR_3	NONFRAMESHIFT DELETION	NA	NA	NA	NA	NA	NA	NA	NA
NW_019170544.1	9478815	A	C	ENSAMXT00000000235	ENSAMXG00000000221	grhl2a	UTR_3	NONCODING	NA	NA	NA	NA	NA	NA	novel	NA
NW_019170544.1	9478819	TCCCCGGGAA	T	ENSAMXT00000000235	ENSAMXG00000000221	grhl2a	UTR_3	NONFRAMESHIFT DELETION	NA	NA	NA	NA	NA	NA	NA	NA
NW_019170544.1	9478820	C	CA	ENSAMXT00000000235	ENSAMXG00000000221	grhl2a	UTR_3	FRAMESHIFT INSERTION	NA	NA	NA	NA	NA	NA	NA	NA
NW_019170544.1	9478821	C	A	ENSAMXT00000000235	ENSAMXG00000000221	grhl2a	UTR_3	NONCODING	NA	NA	NA	NA	NA	NA	novel	NA
NW_019170544.1	9478822	C	CTATTTT	ENSAMXT00000000235	ENSAMXG00000000221	grhl2a	UTR_3	NONFRAMESHIFT INSERTION	NA	NA	NA	NA	NA	NA	NA	NA
NW_019170544.1	9478823	CGGG	C	ENSAMXT00000000235	ENSAMXG00000000221	grhl2a	UTR_3	NONFRAMESHIFT DELETION	NA	NA	NA	NA	NA	NA	NA	NA
NW_019170544.1	9478824	G	T	ENSAMXT00000000235	ENSAMXG00000000221	grhl2a	UTR_3	NONCODING	NA	NA	NA	NA	NA	NA	novel	NA
NW_019170544.1	9478828	A	C	ENSAMXT00000000235	ENSAMXG00000000221	grhl2a	UTR_3	NONCODING	NA	NA	NA	NA	NA	NA	novel	NA
NW_019170544.1	9478836	CTCAGAG	C	ENSAMXT00000000235	ENSAMXG00000000221	grhl2a	UTR_3	NONFRAMESHIFT DELETION	NA	NA	NA	NA	NA	NA	NA	NA
NW_019170544.1	9478842	G	T	ENSAMXT00000000235	ENSAMXG00000000221	grhl2a	UTR_3	NONCODING	NA	NA	NA	NA	NA	NA	novel	NA
NW_019170544.1	9478849	G	A	ENSAMXT00000000235	ENSAMXG00000000221	grhl2a	UTR_3	NONCODING	NA	NA	NA	NA	NA	NA	novel	NA
NW_019170544.1	9478872	G	A	ENSAMXT00000000235	ENSAMXG00000000221	grhl2a	UTR_3	NONCODING	NA	NA	NA	NA	NA	NA	novel	NA
NW_019170544.1	9478888	TTTTCCTTC	T	ENSAMXT00000000235	ENSAMXG00000000221	grhl2a	UTR_3	FRAMESHIFT DELETION	NA	NA	NA	NA	NA	NA	NA	NA
NW_019170544.1	9478897	ACGCTG	A	ENSAMXT00000000235	ENSAMXG00000000221	grhl2a	UTR_3	FRAMESHIFT DELETION	NA	NA	NA	NA	NA	NA	NA	NA
NW_019170544.1	9478900	C	T	ENSAMXT00000000235	ENSAMXG00000000221	grhl2a	UTR_3	NONCODING	NA	NA	NA	NA	NA	NA	novel	NA
NW_019170544.1	9478903	T	A	ENSAMXT00000000235	ENSAMXG00000000221	grhl2a	UTR_3	NONCODING	NA	NA	NA	NA	NA	NA	novel	NA
NW_019170544.1	9478904	GAAGCTC	G	ENSAMXT00000000235	ENSAMXG00000000221	grhl2a	UTR_3	NONFRAMESHIFT DELETION	NA	NA	NA	NA	NA	NA	NA	NA
NW_019170544.1	9478905	A	C	ENSAMXT00000000235	ENSAMXG00000000221	grhl2a	UTR_3	NONCODING	NA	NA	NA	NA	NA	NA	novel	NA
NW_019170544.1	9478917	A	T	ENSAMXT00000000235	ENSAMXG00000000221	grhl2a	UTR_3	NONCODING	NA	NA	NA	NA	NA	NA	novel	NA
NW_019170544.1	9478918	T	A	ENSAMXT00000000235	ENSAMXG00000000221	grhl2a	UTR_3	NONCODING	NA	NA	NA	NA	NA	NA	novel	NA
NW_019170544.1	9478920	CCAAATCACCT	C	ENSAMXT00000000235	ENSAMXG00000000221	grhl2a	UTR_3	FRAMESHIFT DELETION	NA	NA	NA	NA	NA	NA	NA	NA
NW_019170544.1	9478940	A	G	ENSAMXT00000000235	ENSAMXG00000000221	grhl2a	UTR_3	NONCODING	NA	NA	NA	NA	NA	NA	novel	NA
NW_019170544.1	9478944	C	T	ENSAMXT00000000235	ENSAMXG00000000221	grhl2a	UTR_3	NONCODING	NA	NA	NA	NA	NA	NA	novel	NA
NW_019170544.1	9478948	T	A	ENSAMXT00000000235	ENSAMXG00000000221	grhl2a	UTR_3	NONCODING	NA	NA	NA	NA	NA	NA	novel	NA
NW_019170544.1	9478961	G	A	ENSAMXT00000000235	ENSAMXG00000000221	grhl2a	UTR_3	NONCODING	NA	NA	NA	NA	NA	NA	novel	NA
NW_019170544.1	9478963	C	T	ENSAMXT00000000235	ENSAMXG00000000221	grhl2a	UTR_3	NONCODING	NA	NA	NA	NA	NA	NA	novel	NA
NW_019170544.1	9478965	G	A	ENSAMXT00000000235	ENSAMXG00000000221	grhl2a	UTR_3	NONCODING	NA	NA	NA	NA	NA	NA	novel	NA
NW_019170544.1	9478965	G	C	ENSAMXT00000000235	ENSAMXG00000000221	grhl2a	UTR_3	NONCODING	NA	NA	NA	NA	NA	NA	novel	NA
NW_019170544.1	9478966	G	T	ENSAMXT00000000235	ENSAMXG00000000221	grhl2a	UTR_3	NONCODING	NA	NA	NA	NA	NA	NA	novel	NA
NW_019170544.1	9478985	G	A	ENSAMXT00000000235	ENSAMXG00000000221	grhl2a	UTR_3	NONCODING	NA	NA	NA	NA	NA	NA	novel	NA
NW_019170544.1	9478987	C	CT	ENSAMXT00000000235	ENSAMXG00000000221	grhl2a	UTR_3	FRAMESHIFT INSERTION	NA	NA	NA	NA	NA	NA	NA	NA
NW_019170544.1	9478994	A	G	ENSAMXT00000000235	ENSAMXG00000000221	grhl2a	UTR_3	NONCODING	NA	NA	NA	NA	NA	NA	novel	NA
NW_019170544.1	9479005	C	CATAATTGTTTTCTTTATTTAATTTATTTCTACATTGTAGATTAATATTAAATACAAGAAAACAATTATGTAGTAAACA	ENSAMXT00000000235	ENSAMXG00000000221	grhl2a	UTR_3	NONFRAMESHIFT INSERTION	NA	NA	NA	NA	NA	NA	NA	NA
NW_019170544.1	9479039	A	T	ENSAMXT00000000235	ENSAMXG00000000221	grhl2a	UTR_3	NONCODING	NA	NA	NA	NA	NA	NA	novel	NA
NW_019170544.1	9479043	T	G	ENSAMXT00000000235	ENSAMXG00000000221	grhl2a	UTR_3	NONCODING	NA	NA	NA	NA	NA	NA	novel	NA
NW_019170544.1	9479058	TAAAG	T	ENSAMXT00000000235	ENSAMXG00000000221	grhl2a	UTR_3	FRAMESHIFT DELETION	NA	NA	NA	NA	NA	NA	NA	NA
NW_019170544.1	9479059	A	G	ENSAMXT00000000235	ENSAMXG00000000221	grhl2a	UTR_3	NONCODING	NA	NA	NA	NA	NA	NA	novel	NA
NW_019170544.1	9479074	GA	G	ENSAMXT00000000235	ENSAMXG00000000221	grhl2a	UTR_3	FRAMESHIFT DELETION	NA	NA	NA	NA	NA	NA	NA	NA
NW_019170544.1	9479101	T	C	ENSAMXT00000000235	ENSAMXG00000000221	grhl2a	UTR_3	NONCODING	NA	NA	NA	NA	NA	NA	novel	NA
NW_019170544.1	9479124	C	CCAAAAAAAGCTT	ENSAMXT00000000235	ENSAMXG00000000221	grhl2a	UTR_3	NONFRAMESHIFT INSERTION	NA	NA	NA	NA	NA	NA	NA	NA
NW_019170544.1	9479127	TAACCA	T	ENSAMXT00000000235	ENSAMXG00000000221	grhl2a	UTR_3	FRAMESHIFT DELETION	NA	NA	NA	NA	NA	NA	NA	NA
NW_019170544.1	9479131	C	A	ENSAMXT00000000235	ENSAMXG00000000221	grhl2a	UTR_3	NONCODING	NA	NA	NA	NA	NA	NA	novel	NA
NW_019170544.1	9479132	A	AAAAAAGCTTTTT	ENSAMXT00000000235	ENSAMXG00000000221	grhl2a	UTR_3	NONFRAMESHIFT INSERTION	NA	NA	NA	NA	NA	NA	NA	NA
NW_019170544.1	9479132	A	AAAAAAAAGCTTTTT	ENSAMXT00000000235	ENSAMXG00000000221	grhl2a	UTR_3	FRAMESHIFT INSERTION	NA	NA	NA	NA	NA	NA	NA	NA
NW_019170544.1	9479132	A	AAAAAAAGCTTTTTTTT	ENSAMXT00000000235	ENSAMXG00000000221	grhl2a	UTR_3	FRAMESHIFT INSERTION	NA	NA	NA	NA	NA	NA	NA	NA
NW_019170544.1	9479132	A	AAAAAAAGCTTTTT	ENSAMXT00000000235	ENSAMXG00000000221	grhl2a	UTR_3	FRAMESHIFT INSERTION	NA	NA	NA	NA	NA	NA	NA	NA
NW_019170544.1	9479136	A	AAAAG	ENSAMXT00000000235	ENSAMXG00000000221	grhl2a	UTR_3	FRAMESHIFT INSERTION	NA	NA	NA	NA	NA	NA	NA	NA
NW_019170544.1	9479136	A	AAAG	ENSAMXT00000000235	ENSAMXG00000000221	grhl2a	UTR_3	NONFRAMESHIFT INSERTION	NA	NA	NA	NA	NA	NA	NA	NA
NW_019170544.1	9479138	T	TTTTTAAAACA	ENSAMXT00000000235	ENSAMXG00000000221	grhl2a	UTR_3	FRAMESHIFT INSERTION	NA	NA	NA	NA	NA	NA	NA	NA
NW_019170544.1	9479139	AT	A	ENSAMXT00000000235	ENSAMXG00000000221	grhl2a	UTR_3	FRAMESHIFT DELETION	NA	NA	NA	NA	NA	NA	NA	NA
NW_019170544.1	9479143	G	A	ENSAMXT00000000235	ENSAMXG00000000221	grhl2a	UTR_3	NONCODING	NA	NA	NA	NA	NA	NA	novel	NA
NW_019170544.1	9479158	T	G	ENSAMXT00000000235	ENSAMXG00000000221	grhl2a	UTR_3	NONCODING	NA	NA	NA	NA	NA	NA	novel	NA
NW_019170544.1	9479169	A	C	ENSAMXT00000000235	ENSAMXG00000000221	grhl2a	UTR_3	NONCODING	NA	NA	NA	NA	NA	NA	novel	NA
NW_019170544.1	9479177	A	T	ENSAMXT00000000235	ENSAMXG00000000221	grhl2a	UTR_3	NONCODING	NA	NA	NA	NA	NA	NA	novel	NA
NW_019170544.1	9479182	T	C	ENSAMXT00000000235	ENSAMXG00000000221	grhl2a	UTR_3	NONCODING	NA	NA	NA	NA	NA	NA	novel	NA
NW_019170544.1	9479231	T	TA	ENSAMXT00000000235	ENSAMXG00000000221	grhl2a	UTR_3	FRAMESHIFT INSERTION	NA	NA	NA	NA	NA	NA	NA	NA
NW_019170544.1	9479242	T	G	ENSAMXT00000000235	ENSAMXG00000000221	grhl2a	UTR_3	NONCODING	NA	NA	NA	NA	NA	NA	novel	NA
NW_019170544.1	9479244	C	T	ENSAMXT00000000235	ENSAMXG00000000221	grhl2a	UTR_3	NONCODING	NA	NA	NA	NA	NA	NA	novel	NA
NW_019170544.1	9479278	G	A	ENSAMXT00000000235	ENSAMXG00000000221	grhl2a	UTR_3	NONCODING	NA	NA	NA	NA	NA	NA	novel	NA
NW_019170544.1	9479278	G	T	ENSAMXT00000000235	ENSAMXG00000000221	grhl2a	UTR_3	NONCODING	NA	NA	NA	NA	NA	NA	novel	NA
NW_019170544.1	9479292	C	A	ENSAMXT00000000235	ENSAMXG00000000221	grhl2a	UTR_3	NONCODING	NA	NA	NA	NA	NA	NA	novel	NA
NW_019170544.1	9479313	T	C	ENSAMXT00000000235	ENSAMXG00000000221	grhl2a	UTR_3	NONCODING	NA	NA	NA	NA	NA	NA	novel	NA
NW_019170544.1	9479317	T	G	ENSAMXT00000000235	ENSAMXG00000000221	grhl2a	UTR_3	NONCODING	NA	NA	NA	NA	NA	NA	novel	NA
NW_019170544.1	9479325	T	C	ENSAMXT00000000235	ENSAMXG00000000221	grhl2a	UTR_3	NONCODING	NA	NA	NA	NA	NA	NA	novel	NA
NW_019170544.1	9479325	T	G	ENSAMXT00000000235	ENSAMXG00000000221	grhl2a	UTR_3	NONCODING	NA	NA	NA	NA	NA	NA	novel	NA
NW_019170544.1	9479332	T	G	ENSAMXT00000000235	ENSAMXG00000000221	grhl2a	UTR_3	NONCODING	NA	NA	NA	NA	NA	NA	novel	NA
NW_019170544.1	9479333	G	A	ENSAMXT00000000235	ENSAMXG00000000221	grhl2a	UTR_3	NONCODING	NA	NA	NA	NA	NA	NA	novel	NA
NW_019170544.1	9479347	C	T	ENSAMXT00000000235	ENSAMXG00000000221	grhl2a	UTR_3	NONCODING	NA	NA	NA	NA	NA	NA	novel	NA
NW_019170544.1	9479368	G	GTA	ENSAMXT00000000235	ENSAMXG00000000221	grhl2a	UTR_3	FRAMESHIFT INSERTION	NA	NA	NA	NA	NA	NA	NA	NA
NW_019170544.1	9479375	G	GCT	ENSAMXT00000000235	ENSAMXG00000000221	grhl2a	UTR_3	FRAMESHIFT INSERTION	NA	NA	NA	NA	NA	NA	NA	NA
NW_019170544.1	9479378	G	A	ENSAMXT00000000235	ENSAMXG00000000221	grhl2a	UTR_3	NONCODING	NA	NA	NA	NA	NA	NA	novel	NA
NW_019170544.1	9479415	A	C	ENSAMXT00000000235	ENSAMXG00000000221	grhl2a	UTR_3	NONCODING	NA	NA	NA	NA	NA	NA	novel	NA
NW_019170544.1	9479419	A	T	ENSAMXT00000000235	ENSAMXG00000000221	grhl2a	UTR_3	NONCODING	NA	NA	NA	NA	NA	NA	novel	NA
NW_019170544.1	9479432	A	G	ENSAMXT00000000235	ENSAMXG00000000221	grhl2a	UTR_3	NONCODING	NA	NA	NA	NA	NA	NA	novel	NA
NW_019170544.1	9479433	G	C	ENSAMXT00000000235	ENSAMXG00000000221	grhl2a	UTR_3	NONCODING	NA	NA	NA	NA	NA	NA	novel	NA
NW_019170544.1	9479437	A	G	ENSAMXT00000000235	ENSAMXG00000000221	grhl2a	UTR_3	NONCODING	NA	NA	NA	NA	NA	NA	novel	NA
NW_019170544.1	9479438	T	G	ENSAMXT00000000235	ENSAMXG00000000221	grhl2a	UTR_3	NONCODING	NA	NA	NA	NA	NA	NA	novel	NA
NW_019170544.1	9479446	G	T	ENSAMXT00000000235	ENSAMXG00000000221	grhl2a	UTR_3	NONCODING	NA	NA	NA	NA	NA	NA	novel	NA
NW_019170544.1	9479457	A	G	ENSAMXT00000000235	ENSAMXG00000000221	grhl2a	UTR_3	NONCODING	NA	NA	NA	NA	NA	NA	novel	NA
NW_019170544.1	9479467	T	G	ENSAMXT00000000235	ENSAMXG00000000221	grhl2a	UTR_3	NONCODING	NA	NA	NA	NA	NA	NA	novel	NA
NW_019170544.1	9479472	TTA	T	ENSAMXT00000000235	ENSAMXG00000000221	grhl2a	UTR_3	FRAMESHIFT DELETION	NA	NA	NA	NA	NA	NA	NA	NA
NW_019170544.1	9479476	A	T	ENSAMXT00000000235	ENSAMXG00000000221	grhl2a	UTR_3	NONCODING	NA	NA	NA	NA	NA	NA	novel	NA
NW_019170544.1	9479492	A	C	ENSAMXT00000000235	ENSAMXG00000000221	grhl2a	UTR_3	NONCODING	NA	NA	NA	NA	NA	NA	novel	NA
NW_019170544.1	9479540	A	T	ENSAMXT00000000235	ENSAMXG00000000221	grhl2a	UTR_3	NONCODING	NA	NA	NA	NA	NA	NA	novel	NA
NW_019170544.1	9479551	C	G	ENSAMXT00000000235	ENSAMXG00000000221	grhl2a	UTR_3	NONCODING	NA	NA	NA	NA	NA	NA	novel	NA
NW_019170544.1	9479588	G	GT	ENSAMXT00000000235	ENSAMXG00000000221	grhl2a	UTR_3	FRAMESHIFT INSERTION	NA	NA	NA	NA	NA	NA	NA	NA
NW_019170544.1	9479601	C	T	ENSAMXT00000000235	ENSAMXG00000000221	grhl2a	UTR_3	NONCODING	NA	NA	NA	NA	NA	NA	novel	NA
NW_019170544.1	9479623	C	G	ENSAMXT00000000235	ENSAMXG00000000221	grhl2a	UTR_3	NONCODING	NA	NA	NA	NA	NA	NA	novel	NA
NW_019170544.1	9479633	A	G	ENSAMXT00000000235	ENSAMXG00000000221	grhl2a	UTR_3	NONCODING	NA	NA	NA	NA	NA	NA	novel	NA
NW_019170544.1	9479638	G	A	ENSAMXT00000000235	ENSAMXG00000000221	grhl2a	UTR_3	NONCODING	NA	NA	NA	NA	NA	NA	novel	NA
NW_019170544.1	9479655	A	C	ENSAMXT00000000235	ENSAMXG00000000221	grhl2a	UTR_3	NONCODING	NA	NA	NA	NA	NA	NA	novel	NA
NW_019170544.1	9479659	A	G	ENSAMXT00000000235	ENSAMXG00000000221	grhl2a	UTR_3	NONCODING	NA	NA	NA	NA	NA	NA	novel	NA
NW_019170544.1	9479668	A	C	ENSAMXT00000000235	ENSAMXG00000000221	grhl2a	UTR_3	NONCODING	NA	NA	NA	NA	NA	NA	novel	NA
NW_019170544.1	9479669	G	A	ENSAMXT00000000235	ENSAMXG00000000221	grhl2a	UTR_3	NONCODING	NA	NA	NA	NA	NA	NA	novel	NA
NW_019170544.1	9479669	G	T	ENSAMXT00000000235	ENSAMXG00000000221	grhl2a	UTR_3	NONCODING	NA	NA	NA	NA	NA	NA	novel	NA
NW_019170544.1	9479675	A	G	ENSAMXT00000000235	ENSAMXG00000000221	grhl2a	UTR_3	NONCODING	NA	NA	NA	NA	NA	NA	novel	NA
NW_019170544.1	9479677	A	C	ENSAMXT00000000235	ENSAMXG00000000221	grhl2a	UTR_3	NONCODING	NA	NA	NA	NA	NA	NA	novel	NA
NW_019170544.1	9479682	G	C	ENSAMXT00000000235	ENSAMXG00000000221	grhl2a	UTR_3	NONCODING	NA	NA	NA	NA	NA	NA	novel	NA
NW_019170544.1	9479687	AGCT	A	ENSAMXT00000000235	ENSAMXG00000000221	grhl2a	UTR_3	NONFRAMESHIFT DELETION	NA	NA	NA	NA	NA	NA	NA	NA
NW_019170544.1	9479687	AGCT	AGCTGCTGCT	ENSAMXT00000000235	ENSAMXG00000000221	grhl2a	UTR_3	SUBSTITUTION	NA	NA	NA	NA	NA	NA	NA	NA
NW_019170544.1	9479729	C	T	ENSAMXT00000000235	ENSAMXG00000000221	grhl2a	UTR_3	NONCODING	NA	NA	NA	NA	NA	NA	novel	NA
NW_019170544.1	9479736	A	G	ENSAMXT00000000235	ENSAMXG00000000221	grhl2a	UTR_3	NONCODING	NA	NA	NA	NA	NA	NA	novel	NA
NW_019170544.1	9479762	G	A	ENSAMXT00000000235	ENSAMXG00000000221	grhl2a	UTR_3	NONCODING	NA	NA	NA	NA	NA	NA	novel	NA
NW_019170544.1	9479764	A	T	ENSAMXT00000000235	ENSAMXG00000000221	grhl2a	UTR_3	NONCODING	NA	NA	NA	NA	NA	NA	novel	NA
NW_019170544.1	9479794	G	T	ENSAMXT00000000235	ENSAMXG00000000221	grhl2a	UTR_3	NONCODING	NA	NA	NA	NA	NA	NA	novel	NA
NW_019170544.1	9479795	G	A	ENSAMXT00000000235	ENSAMXG00000000221	grhl2a	UTR_3	NONCODING	NA	NA	NA	NA	NA	NA	novel	NA
NW_019170544.1	9479809	T	TTATAA	ENSAMXT00000000235	ENSAMXG00000000221	grhl2a	UTR_3	FRAMESHIFT INSERTION	NA	NA	NA	NA	NA	NA	NA	NA
NW_019170544.1	9479816	A	C	ENSAMXT00000000235	ENSAMXG00000000221	grhl2a	UTR_3	NONCODING	NA	NA	NA	NA	NA	NA	novel	NA
NW_019170544.1	9479855	C	A	ENSAMXT00000000235	ENSAMXG00000000221	grhl2a	UTR_3	NONCODING	NA	NA	NA	NA	NA	NA	novel	NA
NW_019170544.1	9479910	T	C	ENSAMXT00000000235	ENSAMXG00000000221	grhl2a	UTR_3	NONCODING	NA	NA	NA	NA	NA	NA	novel	NA
NW_019170544.1	9479949	C	T	ENSAMXT00000000235	ENSAMXG00000000221	grhl2a	UTR_3	NONCODING	NA	NA	NA	NA	NA	NA	novel	NA
NW_019170544.1	9479987	T	A	ENSAMXT00000000235	ENSAMXG00000000221	grhl2a	UTR_3	NONCODING	NA	NA	NA	NA	NA	NA	novel	NA
NW_019170544.1	9479988	C	T	ENSAMXT00000000235	ENSAMXG00000000221	grhl2a	UTR_3	NONCODING	NA	NA	NA	NA	NA	NA	novel	NA
NW_019170544.1	9479996	C	T	ENSAMXT00000000235	ENSAMXG00000000221	grhl2a	UTR_3	NONCODING	NA	NA	NA	NA	NA	NA	novel	NA
NW_019170544.1	9480002	T	C	ENSAMXT00000000235	ENSAMXG00000000221	grhl2a	UTR_3	NONCODING	NA	NA	NA	NA	NA	NA	novel	NA
NW_019170544.1	9480012	A	C	ENSAMXT00000000235	ENSAMXG00000000221	grhl2a	UTR_3	NONCODING	NA	NA	NA	NA	NA	NA	novel	NA
NW_019170544.1	9480014	AT	ATT	ENSAMXT00000000235	ENSAMXG00000000221	grhl2a	UTR_3	FRAMESHIFT INSERTION	NA	NA	NA	NA	NA	NA	NA	NA
NW_019170544.1	9480014	AT	A	ENSAMXT00000000235	ENSAMXG00000000221	grhl2a	UTR_3	FRAMESHIFT DELETION	NA	NA	NA	NA	NA	NA	NA	NA
NW_019170544.1	9480018	T	C	ENSAMXT00000000235	ENSAMXG00000000221	grhl2a	UTR_3	NONCODING	NA	NA	NA	NA	NA	NA	novel	NA
NW_019170544.1	9480025	G	A	ENSAMXT00000000235	ENSAMXG00000000221	grhl2a	UTR_3	NONCODING	NA	NA	NA	NA	NA	NA	novel	NA
NW_019170544.1	9480034	C	A	ENSAMXT00000000235	ENSAMXG00000000221	grhl2a	UTR_3	NONCODING	NA	NA	NA	NA	NA	NA	novel	NA
NW_019170544.1	9480039	T	TTATGG	ENSAMXT00000000235	ENSAMXG00000000221	grhl2a	UTR_3	FRAMESHIFT INSERTION	NA	NA	NA	NA	NA	NA	NA	NA
NW_019170544.1	9480040	AC	A	ENSAMXT00000000235	ENSAMXG00000000221	grhl2a	UTR_3	FRAMESHIFT DELETION	NA	NA	NA	NA	NA	NA	NA	NA
NW_019170544.1	9480058	G	GA	ENSAMXT00000000235	ENSAMXG00000000221	grhl2a	UTR_3	FRAMESHIFT INSERTION	NA	NA	NA	NA	NA	NA	NA	NA
NW_019170544.1	9480060	A	C	ENSAMXT00000000235	ENSAMXG00000000221	grhl2a	UTR_3	NONCODING	NA	NA	NA	NA	NA	NA	novel	NA
NW_019170544.1	9480061	A	G	ENSAMXT00000000235	ENSAMXG00000000221	grhl2a	UTR_3	NONCODING	NA	NA	NA	NA	NA	NA	novel	NA
NW_019170544.1	9480069	G	A	ENSAMXT00000000235	ENSAMXG00000000221	grhl2a	UTR_3	NONCODING	NA	NA	NA	NA	NA	NA	novel	NA
NW_019170544.1	9480128	A	C	ENSAMXT00000000235	ENSAMXG00000000221	grhl2a	UTR_3	NONCODING	NA	NA	NA	NA	NA	NA	novel	NA
NW_019170544.1	9480160	A	G	ENSAMXT00000000235	ENSAMXG00000000221	grhl2a	UTR_3	NONCODING	NA	NA	NA	NA	NA	NA	novel	NA
NW_019170544.1	9480166	T	G	ENSAMXT00000000235	ENSAMXG00000000221	grhl2a	UTR_3	NONCODING	NA	NA	NA	NA	NA	NA	novel	NA
NW_019170544.1	9480170	C	G	ENSAMXT00000000235	ENSAMXG00000000221	grhl2a	UTR_3	NONCODING	NA	NA	NA	NA	NA	NA	novel	NA
NW_019170544.1	9480204	G	A	ENSAMXT00000000235	ENSAMXG00000000221	grhl2a	UTR_3	NONCODING	NA	NA	NA	NA	NA	NA	novel	NA
NW_019170544.1	9480206	CAT	C	ENSAMXT00000000235	ENSAMXG00000000221	grhl2a	UTR_3	FRAMESHIFT DELETION	NA	NA	NA	NA	NA	NA	NA	NA
NW_019170544.1	9480235	T	A	ENSAMXT00000000235	ENSAMXG00000000221	grhl2a	UTR_3	NONCODING	NA	NA	NA	NA	NA	NA	novel	NA
NW_019170544.1	9480240	C	G	ENSAMXT00000000235	ENSAMXG00000000221	grhl2a	UTR_3	NONCODING	NA	NA	NA	NA	NA	NA	novel	NA
NW_019170544.1	9480253	T	A	ENSAMXT00000000235	ENSAMXG00000000221	grhl2a	UTR_3	NONCODING	NA	NA	NA	NA	NA	NA	novel	NA
NW_019170544.1	9480267	T	TA	ENSAMXT00000000235	ENSAMXG00000000221	grhl2a	UTR_3	FRAMESHIFT INSERTION	NA	NA	NA	NA	NA	NA	NA	NA
NW_019170544.1	9480271	G	GTGCAGATA	ENSAMXT00000000235	ENSAMXG00000000221	grhl2a	UTR_3	FRAMESHIFT INSERTION	NA	NA	NA	NA	NA	NA	NA	NA
NW_019170544.1	9480279	AAT	A	ENSAMXT00000000235	ENSAMXG00000000221	grhl2a	UTR_3	FRAMESHIFT DELETION	NA	NA	NA	NA	NA	NA	NA	NA
NW_019170544.1	9480281	T	TGTGCAGATACTATATAA	ENSAMXT00000000235	ENSAMXG00000000221	grhl2a	UTR_3	FRAMESHIFT INSERTION	NA	NA	NA	NA	NA	NA	NA	NA
NW_019170544.1	9480293	A	ATATAAGTGCAGATACTG	ENSAMXT00000000235	ENSAMXG00000000221	grhl2a	UTR_3	FRAMESHIFT INSERTION	NA	NA	NA	NA	NA	NA	NA	NA
NW_019170544.1	9480316	AAATAGTCCACTAG	A	ENSAMXT00000000235	ENSAMXG00000000221	grhl2a	UTR_3	FRAMESHIFT DELETION	NA	NA	NA	NA	NA	NA	NA	NA
NW_019170544.1	9480317	A	G	ENSAMXT00000000235	ENSAMXG00000000221	grhl2a	UTR_3	NONCODING	NA	NA	NA	NA	NA	NA	novel	NA
NW_019170544.1	9480320	A	C	ENSAMXT00000000235	ENSAMXG00000000221	grhl2a	UTR_3	NONCODING	NA	NA	NA	NA	NA	NA	novel	NA
NW_019170544.1	9480334	CAG	C	ENSAMXT00000000235	ENSAMXG00000000221	grhl2a	UTR_3	FRAMESHIFT DELETION	NA	NA	NA	NA	NA	NA	NA	NA
NW_019170544.1	9480337	T	G	ENSAMXT00000000235	ENSAMXG00000000221	grhl2a	UTR_3	NONCODING	NA	NA	NA	NA	NA	NA	novel	NA
NW_019170544.1	9480372	G	A	ENSAMXT00000000235	ENSAMXG00000000221	grhl2a	UTR_3	NONCODING	NA	NA	NA	NA	NA	NA	novel	NA
NW_019170544.1	9480406	T	C	ENSAMXT00000000235	ENSAMXG00000000221	grhl2a	UTR_3	NONCODING	NA	NA	NA	NA	NA	NA	novel	NA
NW_019170544.1	9480419	A	T	ENSAMXT00000000235	ENSAMXG00000000221	grhl2a	UTR_3	NONCODING	NA	NA	NA	NA	NA	NA	novel	NA
NW_019170544.1	9480420	A	AT	ENSAMXT00000000235	ENSAMXG00000000221	grhl2a	UTR_3	FRAMESHIFT INSERTION	NA	NA	NA	NA	NA	NA	NA	NA
NW_019170544.1	9480420	A	G	ENSAMXT00000000235	ENSAMXG00000000221	grhl2a	UTR_3	NONCODING	NA	NA	NA	NA	NA	NA	novel	NA
NW_019170544.1	9480429	T	A	ENSAMXT00000000235	ENSAMXG00000000221	grhl2a	UTR_3	NONCODING	NA	NA	NA	NA	NA	NA	novel	NA
NW_019170544.1	9480435	CTTTTCTATTGTAAGTTAT	C	ENSAMXT00000000235	ENSAMXG00000000221	grhl2a	UTR_3	NONFRAMESHIFT DELETION	NA	NA	NA	NA	NA	NA	NA	NA
NW_019170544.1	9480440	C	T	ENSAMXT00000000235	ENSAMXG00000000221	grhl2a	UTR_3	NONCODING	NA	NA	NA	NA	NA	NA	novel	NA
NW_019170544.1	9480441	TATTGTAAGTTATTTAATTCTAAGTGATTTAATGA	T	ENSAMXT00000000235	ENSAMXG00000000221	grhl2a	UTR_3	FRAMESHIFT DELETION	NA	NA	NA	NA	NA	NA	NA	NA
NW_019170544.1	9480447	A	G	ENSAMXT00000000235	ENSAMXG00000000221	grhl2a	UTR_3	NONCODING	NA	NA	NA	NA	NA	NA	novel	NA
NW_019170544.1	9480485	GACTGT	AACTGT	ENSAMXT00000000235	ENSAMXG00000000221	grhl2a	UTR_3	SUBSTITUTION	NA	NA	NA	NA	NA	NA	NA	NA
NW_019170544.1	9480485	GACTGT	G	ENSAMXT00000000235	ENSAMXG00000000221	grhl2a	UTR_3	FRAMESHIFT DELETION	NA	NA	NA	NA	NA	NA	NA	NA
NW_019170544.1	9480495	A	G	ENSAMXT00000000235	ENSAMXG00000000221	grhl2a	UTR_3	NONCODING	NA	NA	NA	NA	NA	NA	novel	NA
NW_019170544.1	9480503	C	A	ENSAMXT00000000235	ENSAMXG00000000221	grhl2a	UTR_3	NONCODING	NA	NA	NA	NA	NA	NA	novel	NA
NW_019170544.1	9480524	C	T	ENSAMXT00000000235	ENSAMXG00000000221	grhl2a	UTR_3	NONCODING	NA	NA	NA	NA	NA	NA	novel	NA
NW_019170544.1	9480540	G	T	ENSAMXT00000000235	ENSAMXG00000000221	grhl2a	UTR_3	NONCODING	NA	NA	NA	NA	NA	NA	novel	NA
NW_019170544.1	9480541	G	A	ENSAMXT00000000235	ENSAMXG00000000221	grhl2a	UTR_3	NONCODING	NA	NA	NA	NA	NA	NA	novel	NA
NW_019170544.1	9480560	GTCTCTAAC	G	ENSAMXT00000000235	ENSAMXG00000000221	grhl2a	UTR_3	FRAMESHIFT DELETION	NA	NA	NA	NA	NA	NA	NA	NA
NW_019170544.1	9480592	C	T	ENSAMXT00000000235	ENSAMXG00000000221	grhl2a	UTR_3	NONCODING	NA	NA	NA	NA	NA	NA	novel	NA
NW_019170544.1	9480602	C	T	ENSAMXT00000000235	ENSAMXG00000000221	grhl2a	UTR_3	NONCODING	NA	NA	NA	NA	NA	NA	novel	NA
NW_019170544.1	9480609	G	T	ENSAMXT00000000235	ENSAMXG00000000221	grhl2a	UTR_3	NONCODING	NA	NA	NA	NA	NA	NA	novel	NA
NW_019170544.1	9480622	G	T	ENSAMXT00000000235	ENSAMXG00000000221	grhl2a	UTR_3	NONCODING	NA	NA	NA	NA	NA	NA	novel	NA
NW_019170544.1	9480624	TA	T	ENSAMXT00000000235	ENSAMXG00000000221	grhl2a	UTR_3	FRAMESHIFT DELETION	NA	NA	NA	NA	NA	NA	NA	NA
NW_019170544.1	9480626	T	C	ENSAMXT00000000235	ENSAMXG00000000221	grhl2a	UTR_3	NONCODING	NA	NA	NA	NA	NA	NA	novel	NA
NW_019170544.1	9480632	G	GCGTAATAACTTCGTA	ENSAMXT00000000235	ENSAMXG00000000221	grhl2a	UTR_3	NONFRAMESHIFT INSERTION	NA	NA	NA	NA	NA	NA	NA	NA
NW_019170544.1	9480639	ACAGTATGT	A	ENSAMXT00000000235	ENSAMXG00000000221	grhl2a	UTR_3	FRAMESHIFT DELETION	NA	NA	NA	NA	NA	NA	NA	NA
NW_019170544.1	9480690	ACTGTG	A	ENSAMXT00000000235	ENSAMXG00000000221	grhl2a	UTR_3	FRAMESHIFT DELETION	NA	NA	NA	NA	NA	NA	NA	NA
NW_019170544.1	9480691	CTG	C	ENSAMXT00000000235	ENSAMXG00000000221	grhl2a	UTR_3	FRAMESHIFT DELETION	NA	NA	NA	NA	NA	NA	NA	NA
NW_019170544.1	9480709	T	C	ENSAMXT00000000235	ENSAMXG00000000221	grhl2a	UTR_3	NONCODING	NA	NA	NA	NA	NA	NA	novel	NA
NW_019170544.1	9480718	GT	TT	ENSAMXT00000000235	ENSAMXG00000000221	grhl2a	UTR_3	SUBSTITUTION	NA	NA	NA	NA	NA	NA	NA	NA
NW_019170544.1	9480718	GT	G	ENSAMXT00000000235	ENSAMXG00000000221	grhl2a	UTR_3	FRAMESHIFT DELETION	NA	NA	NA	NA	NA	NA	NA	NA
NW_019170544.1	9480747	C	T	ENSAMXT00000000235	ENSAMXG00000000221	grhl2a	UTR_3	NONCODING	NA	NA	NA	NA	NA	NA	novel	NA
NW_019170544.1	9480749	G	A	ENSAMXT00000000235	ENSAMXG00000000221	grhl2a	UTR_3	NONCODING	NA	NA	NA	NA	NA	NA	novel	NA
NW_019170544.1	9480754	T	C	ENSAMXT00000000235	ENSAMXG00000000221	grhl2a	UTR_3	NONCODING	NA	NA	NA	NA	NA	NA	novel	NA
NW_019170544.1	9480771	T	C	ENSAMXT00000000235	ENSAMXG00000000221	grhl2a	UTR_3	NONCODING	NA	NA	NA	NA	NA	NA	novel	NA
NW_019170544.1	9480785	C	T	ENSAMXT00000000235	ENSAMXG00000000221	grhl2a	UTR_3	NONCODING	NA	NA	NA	NA	NA	NA	novel	NA
NW_019170544.1	9480819	C	T	ENSAMXT00000000235	ENSAMXG00000000221	grhl2a	UTR_3	NONCODING	NA	NA	NA	NA	NA	NA	novel	NA
NW_019170544.1	9480828	A	T	ENSAMXT00000000235	ENSAMXG00000000221	grhl2a	UTR_3	NONCODING	NA	NA	NA	NA	NA	NA	novel	NA
NW_019170544.1	9480829	C	G	ENSAMXT00000000235	ENSAMXG00000000221	grhl2a	UTR_3	NONCODING	NA	NA	NA	NA	NA	NA	novel	NA
NW_019170544.1	9480830	G	A	ENSAMXT00000000235	ENSAMXG00000000221	grhl2a	UTR_3	NONCODING	NA	NA	NA	NA	NA	NA	novel	NA
NW_019170544.1	9480860	T	G	ENSAMXT00000000235	ENSAMXG00000000221	grhl2a	UTR_3	NONCODING	NA	NA	NA	NA	NA	NA	novel	NA
NW_019170544.1	9480883	GATCA	G	ENSAMXT00000000235	ENSAMXG00000000221	grhl2a	UTR_3	FRAMESHIFT DELETION	NA	NA	NA	NA	NA	NA	NA	NA
NW_019170544.1	9480901	ATAAATCTAATATTATTTGCG	A	ENSAMXT00000000235	ENSAMXG00000000221	grhl2a	UTR_3	FRAMESHIFT DELETION	NA	NA	NA	NA	NA	NA	NA	NA
NW_019170544.1	9480912	A	AT	ENSAMXT00000000235	ENSAMXG00000000221	grhl2a	UTR_3	FRAMESHIFT INSERTION	NA	NA	NA	NA	NA	NA	NA	NA
NW_019170544.1	9480920	C	A	ENSAMXT00000000235	ENSAMXG00000000221	grhl2a	UTR_3	NONCODING	NA	NA	NA	NA	NA	NA	novel	NA
NW_019170544.1	9480921	GT	GTT	ENSAMXT00000000235	ENSAMXG00000000221	grhl2a	UTR_3	FRAMESHIFT INSERTION	NA	NA	NA	NA	NA	NA	NA	NA
NW_019170544.1	9480921	GT	G	ENSAMXT00000000235	ENSAMXG00000000221	grhl2a	UTR_3	FRAMESHIFT DELETION	NA	NA	NA	NA	NA	NA	NA	NA
NW_019170544.1	9480929	G	A	ENSAMXT00000000235	ENSAMXG00000000221	grhl2a	UTR_3	NONCODING	NA	NA	NA	NA	NA	NA	novel	NA
NW_019170544.1	9480936	AT	ATT	ENSAMXT00000000235	ENSAMXG00000000221	grhl2a	UTR_3	FRAMESHIFT INSERTION	NA	NA	NA	NA	NA	NA	NA	NA
NW_019170544.1	9480936	AT	A	ENSAMXT00000000235	ENSAMXG00000000221	grhl2a	UTR_3	FRAMESHIFT DELETION	NA	NA	NA	NA	NA	NA	NA	NA
NW_019170544.1	9480936	AT	GT	ENSAMXT00000000235	ENSAMXG00000000221	grhl2a	UTR_3	SUBSTITUTION	NA	NA	NA	NA	NA	NA	NA	NA
NW_019170544.1	9480991	C	A	ENSAMXT00000000235	ENSAMXG00000000221	grhl2a	UTR_3	NONCODING	NA	NA	NA	NA	NA	NA	novel	NA
NW_019170544.1	9481014	G	T	ENSAMXT00000000235	ENSAMXG00000000221	grhl2a	UTR_3	NONCODING	NA	NA	NA	NA	NA	NA	novel	NA
NW_019170544.1	9481028	C	T	ENSAMXT00000000235	ENSAMXG00000000221	grhl2a	UTR_3	NONCODING	NA	NA	NA	NA	NA	NA	novel	NA
NW_019170544.1	9481029	G	A	ENSAMXT00000000235	ENSAMXG00000000221	grhl2a	UTR_3	NONCODING	NA	NA	NA	NA	NA	NA	novel	NA
NW_019170544.1	9481050	GA	G	ENSAMXT00000000235	ENSAMXG00000000221	grhl2a	UTR_3	FRAMESHIFT DELETION	NA	NA	NA	NA	NA	NA	NA	NA
NW_019170544.1	9481054	A	C	ENSAMXT00000000235	ENSAMXG00000000221	grhl2a	UTR_3	NONCODING	NA	NA	NA	NA	NA	NA	novel	NA
NW_019170544.1	9481055	A	T	ENSAMXT00000000235	ENSAMXG00000000221	grhl2a	UTR_3	NONCODING	NA	NA	NA	NA	NA	NA	novel	NA
NW_019170544.1	9481074	T	A	ENSAMXT00000000235	ENSAMXG00000000221	grhl2a	UTR_3	NONCODING	NA	NA	NA	NA	NA	NA	novel	NA
NW_019170544.1	9481075	A	T	ENSAMXT00000000235	ENSAMXG00000000221	grhl2a	UTR_3	NONCODING	NA	NA	NA	NA	NA	NA	novel	NA
NW_019170544.1	9481088	C	A	ENSAMXT00000000235	ENSAMXG00000000221	grhl2a	UTR_3	NONCODING	NA	NA	NA	NA	NA	NA	novel	NA
NW_019170544.1	9481088	C	T	ENSAMXT00000000235	ENSAMXG00000000221	grhl2a	UTR_3	NONCODING	NA	NA	NA	NA	NA	NA	novel	NA
NW_019170544.1	9481111	TA	T	ENSAMXT00000000235	ENSAMXG00000000221	grhl2a	UTR_3	FRAMESHIFT DELETION	NA	NA	NA	NA	NA	NA	NA	NA
NW_019170544.1	9481114	A	C	ENSAMXT00000000235	ENSAMXG00000000221	grhl2a	UTR_3	NONCODING	NA	NA	NA	NA	NA	NA	novel	NA
NW_019170544.1	9481138	A	G	ENSAMXT00000000235	ENSAMXG00000000221	grhl2a	UTR_3	NONCODING	NA	NA	NA	NA	NA	NA	novel	NA
NW_019170544.1	9481162	G	A	ENSAMXT00000000235	ENSAMXG00000000221	grhl2a	UTR_3	NONCODING	NA	NA	NA	NA	NA	NA	novel	NA
NW_019170544.1	9481173	T	C	ENSAMXT00000000235	ENSAMXG00000000221	grhl2a	UTR_3	NONCODING	NA	NA	NA	NA	NA	NA	novel	NA
NW_019170544.1	9481181	T	TA	ENSAMXT00000000235	ENSAMXG00000000221	grhl2a	UTR_3	FRAMESHIFT INSERTION	NA	NA	NA	NA	NA	NA	NA	NA
NW_019170544.1	9481193	T	A	ENSAMXT00000000235	ENSAMXG00000000221	grhl2a	UTR_3	NONCODING	NA	NA	NA	NA	NA	NA	novel	NA
NW_019170544.1	9481195	GCCAATATTAGGGTCAGC	G	ENSAMXT00000000235	ENSAMXG00000000221	grhl2a	UTR_3	FRAMESHIFT DELETION	NA	NA	NA	NA	NA	NA	NA	NA
NW_019170544.1	9481197	C	T	ENSAMXT00000000235	ENSAMXG00000000221	grhl2a	UTR_3	NONCODING	NA	NA	NA	NA	NA	NA	novel	NA
NW_019170544.1	9481198	A	G	ENSAMXT00000000235	ENSAMXG00000000221	grhl2a	UTR_3	NONCODING	NA	NA	NA	NA	NA	NA	novel	NA
NW_019170544.1	9481262	ATTG	A	ENSAMXT00000000235	ENSAMXG00000000221	grhl2a	UTR_3	NONFRAMESHIFT DELETION	NA	NA	NA	NA	NA	NA	NA	NA
NW_019170544.1	9481262	ATTG	ATG	ENSAMXT00000000235	ENSAMXG00000000221	grhl2a	UTR_3	FRAMESHIFT DELETION	NA	NA	NA	NA	NA	NA	NA	NA
NW_019170544.1	9481265	GTATATATATATATAATATA	ATATATATATATATAATATA	ENSAMXT00000000235	ENSAMXG00000000221	grhl2a	UTR_3	SUBSTITUTION	NA	NA	NA	NA	NA	NA	NA	NA
NW_019170544.1	9481265	GTATATATATATATAATATA	GTA	ENSAMXT00000000235	ENSAMXG00000000221	grhl2a	UTR_3	FRAMESHIFT DELETION	NA	NA	NA	NA	NA	NA	NA	NA
NW_019170544.1	9481265	GTATATATATATATAATATA	G	ENSAMXT00000000235	ENSAMXG00000000221	grhl2a	UTR_3	FRAMESHIFT DELETION	NA	NA	NA	NA	NA	NA	NA	NA
NW_019170544.1	9481268	TATATATATATA	T	ENSAMXT00000000235	ENSAMXG00000000221	grhl2a	UTR_3	FRAMESHIFT DELETION	NA	NA	NA	NA	NA	NA	NA	NA
NW_019170544.1	9481270	TATATATATA	T	ENSAMXT00000000235	ENSAMXG00000000221	grhl2a	UTR_3	NONFRAMESHIFT DELETION	NA	NA	NA	NA	NA	NA	NA	NA
NW_019170544.1	9481272	TATATATA	T	ENSAMXT00000000235	ENSAMXG00000000221	grhl2a	UTR_3	FRAMESHIFT DELETION	NA	NA	NA	NA	NA	NA	NA	NA
NW_019170544.1	9481274	TATATA	T	ENSAMXT00000000235	ENSAMXG00000000221	grhl2a	UTR_3	FRAMESHIFT DELETION	NA	NA	NA	NA	NA	NA	NA	NA
NW_019170544.1	9481276	TATA	T	ENSAMXT00000000235	ENSAMXG00000000221	grhl2a	UTR_3	NONFRAMESHIFT DELETION	NA	NA	NA	NA	NA	NA	NA	NA
NW_019170544.1	9481278	TA	T	ENSAMXT00000000235	ENSAMXG00000000221	grhl2a	UTR_3	FRAMESHIFT DELETION	NA	NA	NA	NA	NA	NA	NA	NA
NW_019170544.1	9481278	TA	CA	ENSAMXT00000000235	ENSAMXG00000000221	grhl2a	UTR_3	SUBSTITUTION	NA	NA	NA	NA	NA	NA	NA	NA
NW_019170544.1	9481279	A	ATATAT	ENSAMXT00000000235	ENSAMXG00000000221	grhl2a	UTR_3	FRAMESHIFT INSERTION	NA	NA	NA	NA	NA	NA	NA	NA
NW_019170544.1	9481279	A	AT	ENSAMXT00000000235	ENSAMXG00000000221	grhl2a	UTR_3	FRAMESHIFT INSERTION	NA	NA	NA	NA	NA	NA	NA	NA
NW_019170544.1	9481279	A	ATATATATATAT	ENSAMXT00000000235	ENSAMXG00000000221	grhl2a	UTR_3	FRAMESHIFT INSERTION	NA	NA	NA	NA	NA	NA	NA	NA
NW_019170544.1	9481279	A	ATATATATAT	ENSAMXT00000000235	ENSAMXG00000000221	grhl2a	UTR_3	NONFRAMESHIFT INSERTION	NA	NA	NA	NA	NA	NA	NA	NA
NW_019170544.1	9481279	A	ATATATATATATATATAT	ENSAMXT00000000235	ENSAMXG00000000221	grhl2a	UTR_3	FRAMESHIFT INSERTION	NA	NA	NA	NA	NA	NA	NA	NA
NW_019170544.1	9481279	A	ATAT	ENSAMXT00000000235	ENSAMXG00000000221	grhl2a	UTR_3	NONFRAMESHIFT INSERTION	NA	NA	NA	NA	NA	NA	NA	NA
NW_019170544.1	9481279	A	ATATATATATATAT	ENSAMXT00000000235	ENSAMXG00000000221	grhl2a	UTR_3	FRAMESHIFT INSERTION	NA	NA	NA	NA	NA	NA	NA	NA
NW_019170544.1	9481279	A	ATATATATATATATATATATATAT	ENSAMXT00000000235	ENSAMXG00000000221	grhl2a	UTR_3	FRAMESHIFT INSERTION	NA	NA	NA	NA	NA	NA	NA	NA
NW_019170544.1	9481279	A	ATATATATATATATATATATATATATATCTAT	ENSAMXT00000000235	ENSAMXG00000000221	grhl2a	UTR_3	FRAMESHIFT INSERTION	NA	NA	NA	NA	NA	NA	NA	NA
NW_019170544.1	9481279	A	ATATATAT	ENSAMXT00000000235	ENSAMXG00000000221	grhl2a	UTR_3	FRAMESHIFT INSERTION	NA	NA	NA	NA	NA	NA	NA	NA
NW_019170544.1	9481279	A	ATATATATATATATATATATATATATATATCTAT	ENSAMXT00000000235	ENSAMXG00000000221	grhl2a	UTR_3	NONFRAMESHIFT INSERTION	NA	NA	NA	NA	NA	NA	NA	NA
NW_019170544.1	9481279	A	ATATATATATATATAT	ENSAMXT00000000235	ENSAMXG00000000221	grhl2a	UTR_3	NONFRAMESHIFT INSERTION	NA	NA	NA	NA	NA	NA	NA	NA
NW_019170544.1	9481286	AT	A	ENSAMXT00000000235	ENSAMXG00000000221	grhl2a	UTR_3	FRAMESHIFT DELETION	NA	NA	NA	NA	NA	NA	NA	NA
NW_019170544.1	9481288	ATATATATAGGC	A	ENSAMXT00000000235	ENSAMXG00000000221	grhl2a	UTR_3	FRAMESHIFT DELETION	NA	NA	NA	NA	NA	NA	NA	NA
NW_019170544.1	9481291	T	TACA	ENSAMXT00000000235	ENSAMXG00000000221	grhl2a	UTR_3	NONFRAMESHIFT INSERTION	NA	NA	NA	NA	NA	NA	NA	NA
NW_019170544.1	9481299	C	T	ENSAMXT00000000235	ENSAMXG00000000221	grhl2a	UTR_3	NONCODING	NA	NA	NA	NA	NA	NA	novel	NA
NW_019170544.1	9481301	TGTTAAGGTAA	T	ENSAMXT00000000235	ENSAMXG00000000221	grhl2a	UTR_3	FRAMESHIFT DELETION	NA	NA	NA	NA	NA	NA	NA	NA
NW_019170544.1	9481316	AT	A	ENSAMXT00000000235	ENSAMXG00000000221	grhl2a	UTR_3	FRAMESHIFT DELETION	NA	NA	NA	NA	NA	NA	NA	NA
NW_019170544.1	9481321	ATT	A	ENSAMXT00000000235	ENSAMXG00000000221	grhl2a	UTR_3	FRAMESHIFT DELETION	NA	NA	NA	NA	NA	NA	NA	NA
NW_019170544.1	9481325	TTATGTAGTAACA	T	ENSAMXT00000000235	ENSAMXG00000000221	grhl2a	UTR_3	NONFRAMESHIFT DELETION	NA	NA	NA	NA	NA	NA	NA	NA
NW_019170544.1	9481341	AGTACATAAATAAAATAATCAAG	A	ENSAMXT00000000235	ENSAMXG00000000221	grhl2a	UTR_3	FRAMESHIFT DELETION	NA	NA	NA	NA	NA	NA	NA	NA
NW_019170544.1	9481366	AG	A	ENSAMXT00000000235	ENSAMXG00000000221	grhl2a	UTR_3	FRAMESHIFT DELETION	NA	NA	NA	NA	NA	NA	NA	NA
NW_019170544.1	9481367	G	T	ENSAMXT00000000235	ENSAMXG00000000221	grhl2a	UTR_3	NONCODING	NA	NA	NA	NA	NA	NA	novel	NA
NW_019170544.1	9481369	A	T	ENSAMXT00000000235	ENSAMXG00000000221	grhl2a	UTR_3	NONCODING	NA	NA	NA	NA	NA	NA	novel	NA
NW_019170544.1	9481374	C	T	ENSAMXT00000000235	ENSAMXG00000000221	grhl2a	UTR_3	NONCODING	NA	NA	NA	NA	NA	NA	novel	NA
NW_019170544.1	9481422	T	C	ENSAMXT00000000235	ENSAMXG00000000221	grhl2a	UTR_3	NONCODING	NA	NA	NA	NA	NA	NA	novel	NA
NW_019170544.1	9481432	A	ATACG	ENSAMXT00000000235	ENSAMXG00000000221	grhl2a	UTR_3	FRAMESHIFT INSERTION	NA	NA	NA	NA	NA	NA	NA	NA
NW_019170544.1	9481439	A	G	ENSAMXT00000000235	ENSAMXG00000000221	grhl2a	UTR_3	NONCODING	NA	NA	NA	NA	NA	NA	novel	NA
NW_019170544.1	9481450	A	C	ENSAMXT00000000235	ENSAMXG00000000221	grhl2a	UTR_3	NONCODING	NA	NA	NA	NA	NA	NA	novel	NA
NW_019170544.1	9481471	G	T	ENSAMXT00000000235	ENSAMXG00000000221	grhl2a	UTR_3	NONCODING	NA	NA	NA	NA	NA	NA	novel	NA
NW_019170544.1	9481493	T	C	ENSAMXT00000000235	ENSAMXG00000000221	grhl2a	UTR_3	NONCODING	NA	NA	NA	NA	NA	NA	novel	NA
NW_019170544.1	9481527	ATCTCTCTCTCTCTCTCTCTCTCTCTCTCTCTCTCTCTTCTCTCTCTCTCTCTCTCTCTCTCTCTCTC	ATCTCTCTCTCTCTCTCTCTCTCTC	ENSAMXT00000000235	ENSAMXG00000000221	grhl2a	UTR_3	FRAMESHIFT DELETION	NA	NA	NA	NA	NA	NA	NA	NA
NW_019170544.1	9481527	ATCTCTCTCTCTCTCTCTCTCTCTCTCTCTCTCTCTCTTCTCTCTCTCTCTCTCTCTCTCTCTCTCTC	A	ENSAMXT00000000235	ENSAMXG00000000221	grhl2a	UTR_3	FRAMESHIFT DELETION	NA	NA	NA	NA	NA	NA	NA	NA
NW_019170544.1	9481527	ATCTCTCTCTCTCTCTCTCTCTCTCTCTCTCTCTCTCTTCTCTCTCTCTCTCTCTCTCTCTCTCTCTC	ATCTCTCTCTCTCTCTCTC	ENSAMXT00000000235	ENSAMXG00000000221	grhl2a	UTR_3	FRAMESHIFT DELETION	NA	NA	NA	NA	NA	NA	NA	NA
NW_019170544.1	9481527	ATCTCTCTCTCTCTCTCTCTCTCTCTCTCTCTCTCTCTTCTCTCTCTCTCTCTCTCTCTCTCTCTCTC	ATCTCTCTCTCTC	ENSAMXT00000000235	ENSAMXG00000000221	grhl2a	UTR_3	FRAMESHIFT DELETION	NA	NA	NA	NA	NA	NA	NA	NA
NW_019170544.1	9481527	ATCTCTCTCTCTCTCTCTCTCTCTCTCTCTCTCTCTCTTCTCTCTCTCTCTCTCTCTCTCTCTCTCTC	ATCTCTCTCTCTCTCTCTCTC	ENSAMXT00000000235	ENSAMXG00000000221	grhl2a	UTR_3	FRAMESHIFT DELETION	NA	NA	NA	NA	NA	NA	NA	NA
NW_019170544.1	9481527	ATCTCTCTCTCTCTCTCTCTCTCTCTCTCTCTCTCTCTTCTCTCTCTCTCTCTCTCTCTCTCTCTCTC	ATCTCTCTCTCTCTCTCTCTCTCTCTCTC	ENSAMXT00000000235	ENSAMXG00000000221	grhl2a	UTR_3	SUBSTITUTION	NA	NA	NA	NA	NA	NA	NA	NA
NW_019170544.1	9481527	ATCTCTCTCTCTCTCTCTCTCTCTCTCTCTCTCTCTCTTCTCTCTCTCTCTCTCTCTCTCTCTCTCTC	ATCTCTCTCTCTCTCTCTCTCTC	ENSAMXT00000000235	ENSAMXG00000000221	grhl2a	UTR_3	SUBSTITUTION	NA	NA	NA	NA	NA	NA	NA	NA
NW_019170544.1	9481527	ATCTCTCTCTCTCTCTCTCTCTCTCTCTCTCTCTCTCTTCTCTCTCTCTCTCTCTCTCTCTCTCTCTC	ATCTCTCTCTCTCTCTCTCTCTCTCTCTCTC	ENSAMXT00000000235	ENSAMXG00000000221	grhl2a	UTR_3	FRAMESHIFT DELETION	NA	NA	NA	NA	NA	NA	NA	NA
NW_019170544.1	9481527	ATCTCTCTCTCTCTCTCTCTCTCTCTCTCTCTCTCTCTTCTCTCTCTCTCTCTCTCTCTCTCTCTCTC	ATCTCTCTCTCTCTCTC	ENSAMXT00000000235	ENSAMXG00000000221	grhl2a	UTR_3	SUBSTITUTION	NA	NA	NA	NA	NA	NA	NA	NA
NW_019170544.1	9481527	ATCTCTCTCTCTCTCTCTCTCTCTCTCTCTCTCTCTCTTCTCTCTCTCTCTCTCTCTCTCTCTCTCTC	ATCTCTCTCTCTCTCTCTCTCTCTCTC	ENSAMXT00000000235	ENSAMXG00000000221	grhl2a	UTR_3	FRAMESHIFT DELETION	NA	NA	NA	NA	NA	NA	NA	NA
NW_019170544.1	9481527	ATCTCTCTCTCTCTCTCTCTCTCTCTCTCTCTCTCTCTTCTCTCTCTCTCTCTCTCTCTCTCTCTCTC	ATCTCTCTC	ENSAMXT00000000235	ENSAMXG00000000221	grhl2a	UTR_3	FRAMESHIFT DELETION	NA	NA	NA	NA	NA	NA	NA	NA
NW_019170544.1	9481529	CTCTCTCTCTCTCTCTCTCTCTCTCTCTCTCTCTCT	C	ENSAMXT00000000235	ENSAMXG00000000221	grhl2a	UTR_3	FRAMESHIFT DELETION	NA	NA	NA	NA	NA	NA	NA	NA
NW_019170544.1	9481533	CTCTCTCTCTCTCTCTCTCTCTCTCTCTCTCT	C	ENSAMXT00000000235	ENSAMXG00000000221	grhl2a	UTR_3	FRAMESHIFT DELETION	NA	NA	NA	NA	NA	NA	NA	NA
NW_019170544.1	9481535	CTCTCTCTCTCTCTCTCTCTCTCTCTCTCT	C	ENSAMXT00000000235	ENSAMXG00000000221	grhl2a	UTR_3	FRAMESHIFT DELETION	NA	NA	NA	NA	NA	NA	NA	NA
NW_019170544.1	9481536	T	TCCACCC	ENSAMXT00000000235	ENSAMXG00000000221	grhl2a	UTR_3	NONFRAMESHIFT INSERTION	NA	NA	NA	NA	NA	NA	NA	NA
NW_019170544.1	9481539	CTCTCTCTCTCTCTCTCTCTCTCTCT	C	ENSAMXT00000000235	ENSAMXG00000000221	grhl2a	UTR_3	FRAMESHIFT DELETION	NA	NA	NA	NA	NA	NA	NA	NA
NW_019170544.1	9481543	CTCTCTCTCTCTCTCTCTCTCT	C	ENSAMXT00000000235	ENSAMXG00000000221	grhl2a	UTR_3	NONFRAMESHIFT DELETION	NA	NA	NA	NA	NA	NA	NA	NA
NW_019170544.1	9481545	CTCTCTCTCTCTCTCTCTCT	C	ENSAMXT00000000235	ENSAMXG00000000221	grhl2a	UTR_3	FRAMESHIFT DELETION	NA	NA	NA	NA	NA	NA	NA	NA
NW_019170544.1	9481549	CTCTCTCTCTCTCTCT	C	ENSAMXT00000000235	ENSAMXG00000000221	grhl2a	UTR_3	NONFRAMESHIFT DELETION	NA	NA	NA	NA	NA	NA	NA	NA
NW_019170544.1	9481551	CTCTCTCTCTCTCT	C	ENSAMXT00000000235	ENSAMXG00000000221	grhl2a	UTR_3	FRAMESHIFT DELETION	NA	NA	NA	NA	NA	NA	NA	NA
NW_019170544.1	9481553	CTCTCTCTCTCT	C	ENSAMXT00000000235	ENSAMXG00000000221	grhl2a	UTR_3	FRAMESHIFT DELETION	NA	NA	NA	NA	NA	NA	NA	NA
NW_019170544.1	9481555	CTCTCTCTCT	C	ENSAMXT00000000235	ENSAMXG00000000221	grhl2a	UTR_3	NONFRAMESHIFT DELETION	NA	NA	NA	NA	NA	NA	NA	NA
NW_019170544.1	9481563	CT	C	ENSAMXT00000000235	ENSAMXG00000000221	grhl2a	UTR_3	FRAMESHIFT DELETION	NA	NA	NA	NA	NA	NA	NA	NA
NW_019170544.1	9481652	G	C	ENSAMXT00000000235	ENSAMXG00000000221	grhl2a	UTR_3	NONCODING	NA	NA	NA	NA	NA	NA	novel	NA
NW_019170544.1	9481676	A	G	ENSAMXT00000000235	ENSAMXG00000000221	grhl2a	UTR_3	NONCODING	NA	NA	NA	NA	NA	NA	novel	NA
NW_019170544.1	9481706	T	C	ENSAMXT00000000235	ENSAMXG00000000221	grhl2a	UTR_3	NONCODING	NA	NA	NA	NA	NA	NA	novel	NA
NW_019170544.1	9481709	T	C	ENSAMXT00000000235	ENSAMXG00000000221	grhl2a	UTR_3	NONCODING	NA	NA	NA	NA	NA	NA	novel	NA
NW_019170544.1	9481730	G	A	ENSAMXT00000000235	ENSAMXG00000000221	grhl2a	UTR_3	NONCODING	NA	NA	NA	NA	NA	NA	novel	NA
NW_019170544.1	9481754	G	A	ENSAMXT00000000235	ENSAMXG00000000221	grhl2a	UTR_3	NONCODING	NA	NA	NA	NA	NA	NA	novel	NA
NW_019170544.1	9481754	G	T	ENSAMXT00000000235	ENSAMXG00000000221	grhl2a	UTR_3	NONCODING	NA	NA	NA	NA	NA	NA	novel	NA
NW_019170544.1	9481756	C	A	ENSAMXT00000000235	ENSAMXG00000000221	grhl2a	UTR_3	NONCODING	NA	NA	NA	NA	NA	NA	novel	NA
NW_019170544.1	9481774	C	T	ENSAMXT00000000235	ENSAMXG00000000221	grhl2a	UTR_3	NONCODING	NA	NA	NA	NA	NA	NA	novel	NA
NW_019170544.1	9481775	T	C	ENSAMXT00000000235	ENSAMXG00000000221	grhl2a	UTR_3	NONCODING	NA	NA	NA	NA	NA	NA	novel	NA
NW_019170544.1	9481793	T	C	ENSAMXT00000000235	ENSAMXG00000000221	grhl2a	UTR_3	NONCODING	NA	NA	NA	NA	NA	NA	novel	NA
NW_019170544.1	9481808	T	C	ENSAMXT00000000235	ENSAMXG00000000221	grhl2a	UTR_3	NONCODING	NA	NA	NA	NA	NA	NA	novel	NA
NW_019170544.1	9481811	G	A	ENSAMXT00000000235	ENSAMXG00000000221	grhl2a	UTR_3	NONCODING	NA	NA	NA	NA	NA	NA	novel	NA
NW_019170544.1	9481820	C	CAAAA	ENSAMXT00000000235	ENSAMXG00000000221	grhl2a	UTR_3	FRAMESHIFT INSERTION	NA	NA	NA	NA	NA	NA	NA	NA
NW_019170544.1	9481822	T	TGAGATCATCCGCA	ENSAMXT00000000235	ENSAMXG00000000221	grhl2a	UTR_3	FRAMESHIFT INSERTION	NA	NA	NA	NA	NA	NA	NA	NA
NW_019170544.1	9481825	T	A	ENSAMXT00000000235	ENSAMXG00000000221	grhl2a	UTR_3	NONCODING	NA	NA	NA	NA	NA	NA	novel	NA
NW_019170544.1	9481826	T	G	ENSAMXT00000000235	ENSAMXG00000000221	grhl2a	UTR_3	NONCODING	NA	NA	NA	NA	NA	NA	novel	NA
NW_019170544.1	9542237	CTAA	C	ENSAMXT00000044982	ENSAMXG00000019070	rorc	UTR_3	NONFRAMESHIFT DELETION	NA	NA	NA	NA	NA	NA	NA	NA
NW_019170544.1	9542243	G	A	ENSAMXT00000044982	ENSAMXG00000019070	rorc	UTR_3	NONCODING	NA	NA	NA	NA	NA	NA	novel	NA
NW_019170544.1	9542267	T	C	ENSAMXT00000044982	ENSAMXG00000019070	rorc	UTR_3	NONCODING	NA	NA	NA	NA	NA	NA	novel	NA
NW_019170544.1	9542268	T	A	ENSAMXT00000044982	ENSAMXG00000019070	rorc	UTR_3	NONCODING	NA	NA	NA	NA	NA	NA	novel	NA
NW_019170544.1	9542269	C	T	ENSAMXT00000044982	ENSAMXG00000019070	rorc	UTR_3	NONCODING	NA	NA	NA	NA	NA	NA	novel	NA
NW_019170544.1	9542398	A	T	ENSAMXT00000044982	ENSAMXG00000019070	rorc	UTR_3	NONCODING	NA	NA	NA	NA	NA	NA	novel	NA
NW_019170544.1	9542420	G	T	ENSAMXT00000044982	ENSAMXG00000019070	rorc	UTR_3	NONCODING	NA	NA	NA	NA	NA	NA	novel	NA
NW_019170544.1	9542422	G	GTTA	ENSAMXT00000044982	ENSAMXG00000019070	rorc	UTR_3	NONFRAMESHIFT INSERTION	NA	NA	NA	NA	NA	NA	NA	NA
NW_019170544.1	9542424	T	G	ENSAMXT00000044982	ENSAMXG00000019070	rorc	UTR_3	NONCODING	NA	NA	NA	NA	NA	NA	novel	NA
NW_019170544.1	9542429	T	G	ENSAMXT00000044982	ENSAMXG00000019070	rorc	UTR_3	NONCODING	NA	NA	NA	NA	NA	NA	novel	NA
NW_019170544.1	9542433	A	C	ENSAMXT00000044982	ENSAMXG00000019070	rorc	UTR_3	NONCODING	NA	NA	NA	NA	NA	NA	novel	NA
NW_019170544.1	9542437	CA	CAA	ENSAMXT00000044982	ENSAMXG00000019070	rorc	UTR_3	FRAMESHIFT INSERTION	NA	NA	NA	NA	NA	NA	NA	NA
NW_019170544.1	9542437	CA	C	ENSAMXT00000044982	ENSAMXG00000019070	rorc	UTR_3	FRAMESHIFT DELETION	NA	NA	NA	NA	NA	NA	NA	NA
NW_019170544.1	9542442	T	A	ENSAMXT00000044982	ENSAMXG00000019070	rorc	UTR_3	NONCODING	NA	NA	NA	NA	NA	NA	novel	NA
NW_019170544.1	9542447	C	A	ENSAMXT00000044982	ENSAMXG00000019070	rorc	UTR_3	NONCODING	NA	NA	NA	NA	NA	NA	novel	NA
NW_019170544.1	9542452	C	A	ENSAMXT00000044982	ENSAMXG00000019070	rorc	UTR_3	NONCODING	NA	NA	NA	NA	NA	NA	novel	NA
NW_019170544.1	9542452	C	CA	ENSAMXT00000044982	ENSAMXG00000019070	rorc	UTR_3	FRAMESHIFT INSERTION	NA	NA	NA	NA	NA	NA	NA	NA
NW_019170544.1	9542468	C	T	ENSAMXT00000044982	ENSAMXG00000019070	rorc	UTR_3	NONCODING	NA	NA	NA	NA	NA	NA	novel	NA
NW_019170544.1	9542469	G	A	ENSAMXT00000044982	ENSAMXG00000019070	rorc	UTR_3	NONCODING	NA	NA	NA	NA	NA	NA	novel	NA
NW_019170544.1	9542486	C	CACAA	ENSAMXT00000044982	ENSAMXG00000019070	rorc	UTR_3	FRAMESHIFT INSERTION	NA	NA	NA	NA	NA	NA	NA	NA
NW_019170544.1	9542492	T	A	ENSAMXT00000044982	ENSAMXG00000019070	rorc	UTR_3	NONCODING	NA	NA	NA	NA	NA	NA	novel	NA
NW_019170544.1	9542497	C	G	ENSAMXT00000044982	ENSAMXG00000019070	rorc	UTR_3	NONCODING	NA	NA	NA	NA	NA	NA	novel	NA
NW_019170544.1	9542499	T	A	ENSAMXT00000044982	ENSAMXG00000019070	rorc	UTR_3	NONCODING	NA	NA	NA	NA	NA	NA	novel	NA
NW_019170544.1	9542506	A	C	ENSAMXT00000044982	ENSAMXG00000019070	rorc	UTR_3	NONCODING	NA	NA	NA	NA	NA	NA	novel	NA
NW_019170544.1	9542532	G	T	ENSAMXT00000044982	ENSAMXG00000019070	rorc	UTR_3	NONCODING	NA	NA	NA	NA	NA	NA	novel	NA
NW_019170544.1	9542547	A	ATTAAAT	ENSAMXT00000044982	ENSAMXG00000019070	rorc	UTR_3	NONFRAMESHIFT INSERTION	NA	NA	NA	NA	NA	NA	NA	NA
NW_019170544.1	9542559	G	T	ENSAMXT00000044982	ENSAMXG00000019070	rorc	UTR_3	NONCODING	NA	NA	NA	NA	NA	NA	novel	NA
NW_019170544.1	9542561	T	C	ENSAMXT00000044982	ENSAMXG00000019070	rorc	UTR_3	NONCODING	NA	NA	NA	NA	NA	NA	novel	NA
NW_019170544.1	9542591	C	T	ENSAMXT00000044982	ENSAMXG00000019070	rorc	UTR_3	NONCODING	NA	NA	NA	NA	NA	NA	novel	NA
NW_019170544.1	9542612	A	C	ENSAMXT00000044982	ENSAMXG00000019070	rorc	UTR_3	NONCODING	NA	NA	NA	NA	NA	NA	novel	NA
NW_019170544.1	9542614	A	T	ENSAMXT00000044982	ENSAMXG00000019070	rorc	UTR_3	NONCODING	NA	NA	NA	NA	NA	NA	novel	NA
NW_019170544.1	9542650	T	C	ENSAMXT00000044982	ENSAMXG00000019070	rorc	UTR_3	NONCODING	NA	NA	NA	NA	NA	NA	novel	NA
NW_019170544.1	9542652	G	T	ENSAMXT00000044982	ENSAMXG00000019070	rorc	UTR_3	NONCODING	NA	NA	NA	NA	NA	NA	novel	NA
NW_019170544.1	9542653	A	G	ENSAMXT00000044982	ENSAMXG00000019070	rorc	UTR_3	NONCODING	NA	NA	NA	NA	NA	NA	novel	NA
NW_019170544.1	9542679	C	T	ENSAMXT00000044982	ENSAMXG00000019070	rorc	UTR_3	NONCODING	NA	NA	NA	NA	NA	NA	novel	NA
NW_019170544.1	9542680	T	C	ENSAMXT00000044982	ENSAMXG00000019070	rorc	UTR_3	NONCODING	NA	NA	NA	NA	NA	NA	novel	NA
NW_019170544.1	9542686	A	G	ENSAMXT00000044982	ENSAMXG00000019070	rorc	UTR_3	NONCODING	NA	NA	NA	NA	NA	NA	novel	NA
NW_019170544.1	9542687	C	A	ENSAMXT00000044982	ENSAMXG00000019070	rorc	UTR_3	NONCODING	NA	NA	NA	NA	NA	NA	novel	NA
NW_019170544.1	9542691	T	G	ENSAMXT00000044982	ENSAMXG00000019070	rorc	UTR_3	NONCODING	NA	NA	NA	NA	NA	NA	novel	NA
NW_019170544.1	9542710	C	T	ENSAMXT00000044982	ENSAMXG00000019070	rorc	UTR_3	NONCODING	NA	NA	NA	NA	NA	NA	novel	NA
NW_019170544.1	9542721	CTG	C	ENSAMXT00000044982	ENSAMXG00000019070	rorc	UTR_3	FRAMESHIFT DELETION	NA	NA	NA	NA	NA	NA	NA	NA
NW_019170544.1	9542761	G	A	ENSAMXT00000044982	ENSAMXG00000019070	rorc	UTR_3	NONCODING	NA	NA	NA	NA	NA	NA	novel	NA
NW_019170544.1	9542796	A	ATTAAACAACTGAGTAATTCTATTCTATTAAGAAGAATTACTCAGT	ENSAMXT00000044982	ENSAMXG00000019070	rorc	UTR_3	NONFRAMESHIFT INSERTION	NA	NA	NA	NA	NA	NA	NA	NA
NW_019170544.1	9542796	A	T	ENSAMXT00000044982	ENSAMXG00000019070	rorc	UTR_3	NONCODING	NA	NA	NA	NA	NA	NA	novel	NA
NW_019170544.1	9542834	TCA	T	ENSAMXT00000044982	ENSAMXG00000019070	rorc	UTR_3	FRAMESHIFT DELETION	NA	NA	NA	NA	NA	NA	NA	NA
NW_019170544.1	9542839	CACA	C	ENSAMXT00000044982	ENSAMXG00000019070	rorc	UTR_3	NONFRAMESHIFT DELETION	NA	NA	NA	NA	NA	NA	NA	NA
NW_019170544.1	9542839	CACA	CAAACA	ENSAMXT00000044982	ENSAMXG00000019070	rorc	UTR_3	FRAMESHIFT INSERTION	NA	NA	NA	NA	NA	NA	NA	NA
NW_019170544.1	9542839	CACA	CAACA	ENSAMXT00000044982	ENSAMXG00000019070	rorc	UTR_3	FRAMESHIFT INSERTION	NA	NA	NA	NA	NA	NA	NA	NA
NW_019170544.1	9542840	AC	A	ENSAMXT00000044982	ENSAMXG00000019070	rorc	UTR_3	FRAMESHIFT DELETION	NA	NA	NA	NA	NA	NA	NA	NA
NW_019170544.1	9542846	A	C	ENSAMXT00000044982	ENSAMXG00000019070	rorc	UTR_3	NONCODING	NA	NA	NA	NA	NA	NA	novel	NA
NW_019170544.1	9542864	G	T	ENSAMXT00000044982	ENSAMXG00000019070	rorc	UTR_3	NONCODING	NA	NA	NA	NA	NA	NA	novel	NA
NW_019170544.1	9542868	T	C	ENSAMXT00000044982	ENSAMXG00000019070	rorc	UTR_3	NONCODING	NA	NA	NA	NA	NA	NA	novel	NA
NW_019170544.1	9542887	G	C	ENSAMXT00000044982	ENSAMXG00000019070	rorc	UTR_3	NONCODING	NA	NA	NA	NA	NA	NA	novel	NA
NW_019170544.1	9542903	C	T	ENSAMXT00000044982	ENSAMXG00000019070	rorc	UTR_3	NONCODING	NA	NA	NA	NA	NA	NA	novel	NA
NW_019170544.1	9542911	T	G	ENSAMXT00000044982	ENSAMXG00000019070	rorc	UTR_3	NONCODING	NA	NA	NA	NA	NA	NA	novel	NA
NW_019170544.1	9542913	C	A	ENSAMXT00000044982	ENSAMXG00000019070	rorc	UTR_3	NONCODING	NA	NA	NA	NA	NA	NA	novel	NA
NW_019170544.1	9542917	A	C	ENSAMXT00000044982	ENSAMXG00000019070	rorc	UTR_3	NONCODING	NA	NA	NA	NA	NA	NA	novel	NA
NW_019170544.1	9542936	T	A	ENSAMXT00000044982	ENSAMXG00000019070	rorc	UTR_3	NONCODING	NA	NA	NA	NA	NA	NA	novel	NA
NW_019170544.1	9542952	G	A	ENSAMXT00000044982	ENSAMXG00000019070	rorc	UTR_3	NONCODING	NA	NA	NA	NA	NA	NA	novel	NA
NW_019170544.1	9542961	A	G	ENSAMXT00000044982	ENSAMXG00000019070	rorc	UTR_3	NONCODING	NA	NA	NA	NA	NA	NA	novel	NA
NW_019170544.1	9542997	G	A	ENSAMXT00000044982	ENSAMXG00000019070	rorc	UTR_3	NONCODING	NA	NA	NA	NA	NA	NA	novel	NA
NW_019170544.1	9543014	G	T	ENSAMXT00000044982	ENSAMXG00000019070	rorc	UTR_3	NONCODING	NA	NA	NA	NA	NA	NA	novel	NA
NW_019170544.1	9543034	G	A	ENSAMXT00000044982	ENSAMXG00000019070	rorc	UTR_3	NONCODING	NA	NA	NA	NA	NA	NA	novel	NA
NW_019170544.1	9543048	G	A	ENSAMXT00000044982	ENSAMXG00000019070	rorc	UTR_3	NONCODING	NA	NA	NA	NA	NA	NA	novel	NA
NW_019170544.1	9543048	G	T	ENSAMXT00000044982	ENSAMXG00000019070	rorc	UTR_3	NONCODING	NA	NA	NA	NA	NA	NA	novel	NA
NW_019170544.1	9543086	A	G	ENSAMXT00000044982	ENSAMXG00000019070	rorc	UTR_3	NONCODING	NA	NA	NA	NA	NA	NA	novel	NA
NW_019170544.1	9543090	A	C	ENSAMXT00000044982	ENSAMXG00000019070	rorc	UTR_3	NONCODING	NA	NA	NA	NA	NA	NA	novel	NA
NW_019170544.1	9543091	A	T	ENSAMXT00000044982	ENSAMXG00000019070	rorc	UTR_3	NONCODING	NA	NA	NA	NA	NA	NA	novel	NA
NW_019170544.1	9543111	C	A	ENSAMXT00000044982	ENSAMXG00000019070	rorc	UTR_3	NONCODING	NA	NA	NA	NA	NA	NA	novel	NA
NW_019170544.1	9543114	A	C	ENSAMXT00000044982	ENSAMXG00000019070	rorc	UTR_3	NONCODING	NA	NA	NA	NA	NA	NA	novel	NA
NW_019170544.1	9543117	TA	T	ENSAMXT00000044982	ENSAMXG00000019070	rorc	UTR_3	FRAMESHIFT DELETION	NA	NA	NA	NA	NA	NA	NA	NA
NW_019170544.1	9543121	A	C	ENSAMXT00000044982	ENSAMXG00000019070	rorc	UTR_3	NONCODING	NA	NA	NA	NA	NA	NA	novel	NA
NW_019170544.1	9543153	ATCG	A	ENSAMXT00000044982	ENSAMXG00000019070	rorc	UTR_3	NONFRAMESHIFT DELETION	NA	NA	NA	NA	NA	NA	NA	NA
NW_019170544.1	9543155	CGTT	C	ENSAMXT00000044982	ENSAMXG00000019070	rorc	UTR_3	NONFRAMESHIFT DELETION	NA	NA	NA	NA	NA	NA	NA	NA
NW_019170544.1	9543155	CGTT	TGTT	ENSAMXT00000044982	ENSAMXG00000019070	rorc	UTR_3	SUBSTITUTION	NA	NA	NA	NA	NA	NA	NA	NA
NW_019170544.1	9543203	TTGTGAG	T	ENSAMXT00000044982	ENSAMXG00000019070	rorc	UTR_3	NONFRAMESHIFT DELETION	NA	NA	NA	NA	NA	NA	NA	NA
NW_019170544.1	9543238	T	G	ENSAMXT00000044982	ENSAMXG00000019070	rorc	UTR_3	NONCODING	NA	NA	NA	NA	NA	NA	novel	NA
NW_019170544.1	9543239	A	T	ENSAMXT00000044982	ENSAMXG00000019070	rorc	UTR_3	NONCODING	NA	NA	NA	NA	NA	NA	novel	NA
NW_019170544.1	9543262	A	C	ENSAMXT00000044982	ENSAMXG00000019070	rorc	UTR_3	NONCODING	NA	NA	NA	NA	NA	NA	novel	NA
NW_019170544.1	9543322	T	G	ENSAMXT00000044982	ENSAMXG00000019070	rorc	UTR_3	NONCODING	NA	NA	NA	NA	NA	NA	novel	NA
NW_019170544.1	9543327	G	A	ENSAMXT00000044982	ENSAMXG00000019070	rorc	UTR_3	NONCODING	NA	NA	NA	NA	NA	NA	novel	NA
NW_019170544.1	9543327	G	GCTTTTAAA	ENSAMXT00000044982	ENSAMXG00000019070	rorc	UTR_3	FRAMESHIFT INSERTION	NA	NA	NA	NA	NA	NA	NA	NA
NW_019170544.1	9543339	A	G	ENSAMXT00000044982	ENSAMXG00000019070	rorc	UTR_3	NONCODING	NA	NA	NA	NA	NA	NA	novel	NA
NW_019170544.1	9543358	T	C	ENSAMXT00000044982	ENSAMXG00000019070	rorc	UTR_3	NONCODING	NA	NA	NA	NA	NA	NA	novel	NA
NW_019170544.1	9543371	T	C	ENSAMXT00000044982	ENSAMXG00000019070	rorc	UTR_3	NONCODING	NA	NA	NA	NA	NA	NA	novel	NA
NW_019170544.1	9543372	A	C	ENSAMXT00000044982	ENSAMXG00000019070	rorc	UTR_3	NONCODING	NA	NA	NA	NA	NA	NA	novel	NA
NW_019170544.1	9543377	A	C	ENSAMXT00000044982	ENSAMXG00000019070	rorc	UTR_3	NONCODING	NA	NA	NA	NA	NA	NA	novel	NA
NW_019170544.1	9543385	G	A	ENSAMXT00000044982	ENSAMXG00000019070	rorc	UTR_3	NONCODING	NA	NA	NA	NA	NA	NA	novel	NA
NW_019170544.1	9543386	C	T	ENSAMXT00000044982	ENSAMXG00000019070	rorc	UTR_3	NONCODING	NA	NA	NA	NA	NA	NA	novel	NA
NW_019170544.1	9543387	A	C	ENSAMXT00000044982	ENSAMXG00000019070	rorc	UTR_3	NONCODING	NA	NA	NA	NA	NA	NA	novel	NA
NW_019170544.1	9543397	A	G	ENSAMXT00000044982	ENSAMXG00000019070	rorc	UTR_3	NONCODING	NA	NA	NA	NA	NA	NA	novel	NA
NW_019170544.1	9543399	T	C	ENSAMXT00000044982	ENSAMXG00000019070	rorc	UTR_3	NONCODING	NA	NA	NA	NA	NA	NA	novel	NA
NW_019170544.1	9543400	A	G	ENSAMXT00000044982	ENSAMXG00000019070	rorc	UTR_3	NONCODING	NA	NA	NA	NA	NA	NA	novel	NA
NW_019170544.1	9543404	A	T	ENSAMXT00000044982	ENSAMXG00000019070	rorc	UTR_3	NONCODING	NA	NA	NA	NA	NA	NA	novel	NA
NW_019170544.1	9543408	G	A	ENSAMXT00000044982	ENSAMXG00000019070	rorc	UTR_3	NONCODING	NA	NA	NA	NA	NA	NA	novel	NA
NW_019170544.1	9543413	A	G	ENSAMXT00000044982	ENSAMXG00000019070	rorc	UTR_3	NONCODING	NA	NA	NA	NA	NA	NA	novel	NA
NW_019170544.1	9543420	T	G	ENSAMXT00000044982	ENSAMXG00000019070	rorc	UTR_3	NONCODING	NA	NA	NA	NA	NA	NA	novel	NA
NW_019170544.1	9543422	G	T	ENSAMXT00000044982	ENSAMXG00000019070	rorc	UTR_3	NONCODING	NA	NA	NA	NA	NA	NA	novel	NA
NW_019170544.1	9543430	A	G	ENSAMXT00000044982	ENSAMXG00000019070	rorc	UTR_3	NONCODING	NA	NA	NA	NA	NA	NA	novel	NA
NW_019170544.1	9543440	A	G	ENSAMXT00000044982	ENSAMXG00000019070	rorc	UTR_3	NONCODING	NA	NA	NA	NA	NA	NA	novel	NA
NW_019170544.1	9543441	A	C	ENSAMXT00000044982	ENSAMXG00000019070	rorc	UTR_3	NONCODING	NA	NA	NA	NA	NA	NA	novel	NA
NW_019170544.1	9543450	T	A	ENSAMXT00000044982	ENSAMXG00000019070	rorc	UTR_3	NONCODING	NA	NA	NA	NA	NA	NA	novel	NA
NW_019170544.1	9543450	T	G	ENSAMXT00000044982	ENSAMXG00000019070	rorc	UTR_3	NONCODING	NA	NA	NA	NA	NA	NA	novel	NA
NW_019170544.1	9543451	T	C	ENSAMXT00000044982	ENSAMXG00000019070	rorc	UTR_3	NONCODING	NA	NA	NA	NA	NA	NA	novel	NA
NW_019170544.1	9543453	A	ATACCCATTTCG	ENSAMXT00000044982	ENSAMXG00000019070	rorc	UTR_3	FRAMESHIFT INSERTION	NA	NA	NA	NA	NA	NA	NA	NA
NW_019170544.1	9543460	T	TAAC	ENSAMXT00000044982	ENSAMXG00000019070	rorc	UTR_3	NONFRAMESHIFT INSERTION	NA	NA	NA	NA	NA	NA	NA	NA
NW_019170544.1	9543461	T	A	ENSAMXT00000044982	ENSAMXG00000019070	rorc	UTR_3	NONCODING	NA	NA	NA	NA	NA	NA	novel	NA
NW_019170544.1	9543465	T	TA	ENSAMXT00000044982	ENSAMXG00000019070	rorc	UTR_3	FRAMESHIFT INSERTION	NA	NA	NA	NA	NA	NA	NA	NA
NW_019170544.1	9543466	T	C	ENSAMXT00000044982	ENSAMXG00000019070	rorc	UTR_3	NONCODING	NA	NA	NA	NA	NA	NA	novel	NA
NW_019170544.1	9543483	A	T	ENSAMXT00000044982	ENSAMXG00000019070	rorc	UTR_3	NONCODING	NA	NA	NA	NA	NA	NA	novel	NA
NW_019170544.1	9543485	G	GAT	ENSAMXT00000044982	ENSAMXG00000019070	rorc	UTR_3	FRAMESHIFT INSERTION	NA	NA	NA	NA	NA	NA	NA	NA
NW_019170544.1	9543486	GCT	G	ENSAMXT00000044982	ENSAMXG00000019070	rorc	UTR_3	FRAMESHIFT DELETION	NA	NA	NA	NA	NA	NA	NA	NA
NW_019170544.1	9543489	T	TAC	ENSAMXT00000044982	ENSAMXG00000019070	rorc	UTR_3	FRAMESHIFT INSERTION	NA	NA	NA	NA	NA	NA	NA	NA
NW_019170544.1	9543492	T	A	ENSAMXT00000044982	ENSAMXG00000019070	rorc	UTR_3	NONCODING	NA	NA	NA	NA	NA	NA	novel	NA
NW_019170544.1	9543493	ATG	A	ENSAMXT00000044982	ENSAMXG00000019070	rorc	UTR_3	FRAMESHIFT DELETION	NA	NA	NA	NA	NA	NA	NA	NA
NW_019170544.1	9543503	T	C	ENSAMXT00000044982	ENSAMXG00000019070	rorc	UTR_3	NONCODING	NA	NA	NA	NA	NA	NA	novel	NA
NW_019170544.1	9543522	G	A	ENSAMXT00000044982	ENSAMXG00000019070	rorc	UTR_3	NONCODING	NA	NA	NA	NA	NA	NA	novel	NA
NW_019170544.1	9543534	G	A	ENSAMXT00000044982	ENSAMXG00000019070	rorc	UTR_3	NONCODING	NA	NA	NA	NA	NA	NA	novel	NA
NW_019170544.1	9543534	G	C	ENSAMXT00000044982	ENSAMXG00000019070	rorc	UTR_3	NONCODING	NA	NA	NA	NA	NA	NA	novel	NA
NW_019170544.1	9543545	G	C	ENSAMXT00000044982	ENSAMXG00000019070	rorc	UTR_3	NONCODING	NA	NA	NA	NA	NA	NA	novel	NA
NW_019170544.1	9543545	G	T	ENSAMXT00000044982	ENSAMXG00000019070	rorc	UTR_3	NONCODING	NA	NA	NA	NA	NA	NA	novel	NA
NW_019170544.1	9543573	G	A	ENSAMXT00000044982	ENSAMXG00000019070	rorc	UTR_3	NONCODING	NA	NA	NA	NA	NA	NA	novel	NA
NW_019170544.1	9543585	T	C	ENSAMXT00000044982	ENSAMXG00000019070	rorc	UTR_3	NONCODING	NA	NA	NA	NA	NA	NA	novel	NA
NW_019170544.1	9543589	C	A	ENSAMXT00000044982	ENSAMXG00000019070	rorc	UTR_3	NONCODING	NA	NA	NA	NA	NA	NA	novel	NA
NW_019170544.1	9543591	A	AATTC	ENSAMXT00000044982	ENSAMXG00000019070	rorc	UTR_3	FRAMESHIFT INSERTION	NA	NA	NA	NA	NA	NA	NA	NA
NW_019170544.1	9543594	GTC	G	ENSAMXT00000044982	ENSAMXG00000019070	rorc	UTR_3	FRAMESHIFT DELETION	NA	NA	NA	NA	NA	NA	NA	NA
NW_019170544.1	9543597	T	TGAA	ENSAMXT00000044982	ENSAMXG00000019070	rorc	UTR_3	NONFRAMESHIFT INSERTION	NA	NA	NA	NA	NA	NA	NA	NA
NW_019170544.1	9543603	A	C	ENSAMXT00000044982	ENSAMXG00000019070	rorc	UTR_3	NONCODING	NA	NA	NA	NA	NA	NA	novel	NA
NW_019170544.1	9543606	C	T	ENSAMXT00000044982	ENSAMXG00000019070	rorc	UTR_3	NONCODING	NA	NA	NA	NA	NA	NA	novel	NA
NW_019170544.1	9543607	G	A	ENSAMXT00000044982	ENSAMXG00000019070	rorc	UTR_3	NONCODING	NA	NA	NA	NA	NA	NA	novel	NA
NW_019170544.1	9543626	G	T	ENSAMXT00000044982	ENSAMXG00000019070	rorc	UTR_3	NONCODING	NA	NA	NA	NA	NA	NA	novel	NA
NW_019170544.1	9543627	C	CTGCTCT	ENSAMXT00000044982	ENSAMXG00000019070	rorc	UTR_3	NONFRAMESHIFT INSERTION	NA	NA	NA	NA	NA	NA	NA	NA
NW_019170544.1	9543643	CTG	C	ENSAMXT00000044982	ENSAMXG00000019070	rorc	UTR_3	FRAMESHIFT DELETION	NA	NA	NA	NA	NA	NA	NA	NA
NW_019170544.1	9543647	GAATGGAGA	G	ENSAMXT00000044982	ENSAMXG00000019070	rorc	UTR_3	FRAMESHIFT DELETION	NA	NA	NA	NA	NA	NA	NA	NA
NW_019170544.1	9543656	CCTGAAACTAACAAAACA	ACTGAAACTAACAAAACA	ENSAMXT00000044982	ENSAMXG00000019070	rorc	UTR_3	SUBSTITUTION	NA	NA	NA	NA	NA	NA	NA	NA
NW_019170544.1	9543656	CCTGAAACTAACAAAACA	C	ENSAMXT00000044982	ENSAMXG00000019070	rorc	UTR_3	FRAMESHIFT DELETION	NA	NA	NA	NA	NA	NA	NA	NA
NW_019170544.1	9543672	C	G	ENSAMXT00000044982	ENSAMXG00000019070	rorc	UTR_3	NONCODING	NA	NA	NA	NA	NA	NA	novel	NA
NW_019170544.1	9543679	A	C	ENSAMXT00000044982	ENSAMXG00000019070	rorc	UTR_3	NONCODING	NA	NA	NA	NA	NA	NA	novel	NA
NW_019170544.1	9543699	T	A	ENSAMXT00000044982	ENSAMXG00000019070	rorc	UTR_3	NONCODING	NA	NA	NA	NA	NA	NA	novel	NA
NW_019170544.1	9543700	A	T	ENSAMXT00000044982	ENSAMXG00000019070	rorc	UTR_3	NONCODING	NA	NA	NA	NA	NA	NA	novel	NA
NW_019170544.1	9543707	T	C	ENSAMXT00000044982	ENSAMXG00000019070	rorc	UTR_3	NONCODING	NA	NA	NA	NA	NA	NA	novel	NA
NW_019170544.1	9543714	G	C	ENSAMXT00000044982	ENSAMXG00000019070	rorc	UTR_3	NONCODING	NA	NA	NA	NA	NA	NA	novel	NA
NW_019170544.1	9543722	G	C	ENSAMXT00000044982	ENSAMXG00000019070	rorc	UTR_3	NONCODING	NA	NA	NA	NA	NA	NA	novel	NA
NW_019170544.1	9543723	A	ATT	ENSAMXT00000044982	ENSAMXG00000019070	rorc	UTR_3	FRAMESHIFT INSERTION	NA	NA	NA	NA	NA	NA	NA	NA
NW_019170544.1	9543724	T	A	ENSAMXT00000044982	ENSAMXG00000019070	rorc	UTR_3	NONCODING	NA	NA	NA	NA	NA	NA	novel	NA
NW_019170544.1	9543725	A	T	ENSAMXT00000044982	ENSAMXG00000019070	rorc	UTR_3	NONCODING	NA	NA	NA	NA	NA	NA	novel	NA
NW_019170544.1	9543727	A	G	ENSAMXT00000044982	ENSAMXG00000019070	rorc	UTR_3	NONCODING	NA	NA	NA	NA	NA	NA	novel	NA
NW_019170544.1	9543728	G	A	ENSAMXT00000044982	ENSAMXG00000019070	rorc	UTR_3	NONCODING	NA	NA	NA	NA	NA	NA	novel	NA
NW_019170544.1	9543734	T	C	ENSAMXT00000044982	ENSAMXG00000019070	rorc	UTR_3	NONCODING	NA	NA	NA	NA	NA	NA	novel	NA
NW_019170544.1	9543736	T	G	ENSAMXT00000044982	ENSAMXG00000019070	rorc	UTR_3	NONCODING	NA	NA	NA	NA	NA	NA	novel	NA
NW_019170544.1	9543747	TC	CC	ENSAMXT00000044982	ENSAMXG00000019070	rorc	UTR_3	SUBSTITUTION	NA	NA	NA	NA	NA	NA	NA	NA
NW_019170544.1	9543747	TC	T	ENSAMXT00000044982	ENSAMXG00000019070	rorc	UTR_3	FRAMESHIFT DELETION	NA	NA	NA	NA	NA	NA	NA	NA
NW_019170544.1	9543749	A	G	ENSAMXT00000044982	ENSAMXG00000019070	rorc	UTR_3	NONCODING	NA	NA	NA	NA	NA	NA	novel	NA
NW_019170544.1	9543754	T	TCACAAAATC	ENSAMXT00000044982	ENSAMXG00000019070	rorc	UTR_3	NONFRAMESHIFT INSERTION	NA	NA	NA	NA	NA	NA	NA	NA
NW_019170544.1	9543755	G	GAAC	ENSAMXT00000044982	ENSAMXG00000019070	rorc	UTR_3	NONFRAMESHIFT INSERTION	NA	NA	NA	NA	NA	NA	NA	NA
NW_019170544.1	9543761	T	C	ENSAMXT00000044982	ENSAMXG00000019070	rorc	UTR_3	NONCODING	NA	NA	NA	NA	NA	NA	novel	NA
NW_019170544.1	9543770	G	T	ENSAMXT00000044982	ENSAMXG00000019070	rorc	UTR_3	NONCODING	NA	NA	NA	NA	NA	NA	novel	NA
NW_019170544.1	9543782	G	T	ENSAMXT00000044982	ENSAMXG00000019070	rorc	UTR_3	NONCODING	NA	NA	NA	NA	NA	NA	novel	NA
NW_019170544.1	9543788	G	A	ENSAMXT00000044982	ENSAMXG00000019070	rorc	UTR_3	NONCODING	NA	NA	NA	NA	NA	NA	novel	NA
NW_019170544.1	9543789	A	C	ENSAMXT00000044982	ENSAMXG00000019070	rorc	UTR_3	NONCODING	NA	NA	NA	NA	NA	NA	novel	NA
NW_019170544.1	9543791	T	C	ENSAMXT00000044982	ENSAMXG00000019070	rorc	UTR_3	NONCODING	NA	NA	NA	NA	NA	NA	novel	NA
NW_019170544.1	9543803	A	C	ENSAMXT00000044982	ENSAMXG00000019070	rorc	UTR_3	NONCODING	NA	NA	NA	NA	NA	NA	novel	NA
NW_019170544.1	9543804	T	G	ENSAMXT00000044982	ENSAMXG00000019070	rorc	UTR_3	NONCODING	NA	NA	NA	NA	NA	NA	novel	NA
NW_019170544.1	9543809	T	C	ENSAMXT00000044982	ENSAMXG00000019070	rorc	UTR_3	NONCODING	NA	NA	NA	NA	NA	NA	novel	NA
NW_019170544.1	9543820	G	A	ENSAMXT00000044982	ENSAMXG00000019070	rorc	UTR_3	NONCODING	NA	NA	NA	NA	NA	NA	novel	NA
NW_019170544.1	9543824	T	A	ENSAMXT00000044982	ENSAMXG00000019070	rorc	UTR_3	NONCODING	NA	NA	NA	NA	NA	NA	novel	NA
NW_019170544.1	9543825	C	G	ENSAMXT00000044982	ENSAMXG00000019070	rorc	UTR_3	NONCODING	NA	NA	NA	NA	NA	NA	novel	NA
NW_019170544.1	9543828	C	T	ENSAMXT00000044982	ENSAMXG00000019070	rorc	UTR_3	NONCODING	NA	NA	NA	NA	NA	NA	novel	NA
NW_019170544.1	9543829	G	A	ENSAMXT00000044982	ENSAMXG00000019070	rorc	UTR_3	NONCODING	NA	NA	NA	NA	NA	NA	novel	NA
NW_019170544.1	9543830	T	A	ENSAMXT00000044982	ENSAMXG00000019070	rorc	UTR_3	NONCODING	NA	NA	NA	NA	NA	NA	novel	NA
NW_019170544.1	9543848	G	A	ENSAMXT00000044982	ENSAMXG00000019070	rorc	UTR_3	NONCODING	NA	NA	NA	NA	NA	NA	novel	NA
NW_019170544.1	9543851	A	G	ENSAMXT00000044982	ENSAMXG00000019070	rorc	UTR_3	NONCODING	NA	NA	NA	NA	NA	NA	novel	NA
NW_019170544.1	9543856	G	A	ENSAMXT00000044982	ENSAMXG00000019070	rorc	UTR_3	NONCODING	NA	NA	NA	NA	NA	NA	novel	NA
NW_019170544.1	9543864	A	T	ENSAMXT00000044982	ENSAMXG00000019070	rorc	UTR_3	NONCODING	NA	NA	NA	NA	NA	NA	novel	NA
NW_019170544.1	9543870	G	A	ENSAMXT00000044982	ENSAMXG00000019070	rorc	UTR_3	NONCODING	NA	NA	NA	NA	NA	NA	novel	NA
NW_019170544.1	9543920	G	T	ENSAMXT00000044982	ENSAMXG00000019070	rorc	UTR_3	NONCODING	NA	NA	NA	NA	NA	NA	novel	NA
NW_019170544.1	9543925	T	A	ENSAMXT00000044982	ENSAMXG00000019070	rorc	UTR_3	NONCODING	NA	NA	NA	NA	NA	NA	novel	NA
NW_019170544.1	9543928	C	T	ENSAMXT00000044982	ENSAMXG00000019070	rorc	UTR_3	NONCODING	NA	NA	NA	NA	NA	NA	novel	NA
NW_019170544.1	9543942	T	G	ENSAMXT00000044982	ENSAMXG00000019070	rorc	UTR_3	NONCODING	NA	NA	NA	NA	NA	NA	novel	NA
NW_019170544.1	9543943	G	A	ENSAMXT00000044982	ENSAMXG00000019070	rorc	UTR_3	NONCODING	NA	NA	NA	NA	NA	NA	novel	NA
NW_019170544.1	9543949	C	T	ENSAMXT00000044982	ENSAMXG00000019070	rorc	UTR_3	NONCODING	NA	NA	NA	NA	NA	NA	novel	NA
NW_019170544.1	9543954	C	A	ENSAMXT00000044982	ENSAMXG00000019070	rorc	UTR_3	NONCODING	NA	NA	NA	NA	NA	NA	novel	NA
NW_019170544.1	9543955	T	A	ENSAMXT00000044982	ENSAMXG00000019070	rorc	UTR_3	NONCODING	NA	NA	NA	NA	NA	NA	novel	NA
NW_019170544.1	9543966	A	AG	ENSAMXT00000044982	ENSAMXG00000019070	rorc	UTR_3	FRAMESHIFT INSERTION	NA	NA	NA	NA	NA	NA	NA	NA
NW_019170544.1	9543967	GT	GTT	ENSAMXT00000044982	ENSAMXG00000019070	rorc	UTR_3	FRAMESHIFT INSERTION	NA	NA	NA	NA	NA	NA	NA	NA
NW_019170544.1	9543967	GT	G	ENSAMXT00000044982	ENSAMXG00000019070	rorc	UTR_3	FRAMESHIFT DELETION	NA	NA	NA	NA	NA	NA	NA	NA
NW_019170544.1	9543971	T	G	ENSAMXT00000044982	ENSAMXG00000019070	rorc	UTR_3	NONCODING	NA	NA	NA	NA	NA	NA	novel	NA
NW_019170544.1	9543983	G	C	ENSAMXT00000044982	ENSAMXG00000019070	rorc	UTR_3	NONCODING	NA	NA	NA	NA	NA	NA	novel	NA
NW_019170544.1	9543997	C	A	ENSAMXT00000044982	ENSAMXG00000019070	rorc	UTR_3	NONCODING	NA	NA	NA	NA	NA	NA	novel	NA
NW_019170544.1	9544036	A	G	ENSAMXT00000044982	ENSAMXG00000019070	rorc	UTR_3	NONCODING	NA	NA	NA	NA	NA	NA	novel	NA
NW_019170544.1	9544047	A	T	ENSAMXT00000044982	ENSAMXG00000019070	rorc	UTR_3	NONCODING	NA	NA	NA	NA	NA	NA	novel	NA
NW_019170544.1	9544072	A	G	ENSAMXT00000044982	ENSAMXG00000019070	rorc	UTR_3	NONCODING	NA	NA	NA	NA	NA	NA	novel	NA
NW_019170544.1	9544075	T	C	ENSAMXT00000044982	ENSAMXG00000019070	rorc	UTR_3	NONCODING	NA	NA	NA	NA	NA	NA	novel	NA
NW_019170544.1	9544086	A	G	ENSAMXT00000044982	ENSAMXG00000019070	rorc	UTR_3	NONCODING	NA	NA	NA	NA	NA	NA	novel	NA
NW_019170544.1	9544108	G	C	ENSAMXT00000044982	ENSAMXG00000019070	rorc	UTR_3	NONCODING	NA	NA	NA	NA	NA	NA	novel	NA
NW_019170544.1	9544116	T	C	ENSAMXT00000044982	ENSAMXG00000019070	rorc	UTR_3	NONCODING	NA	NA	NA	NA	NA	NA	novel	NA
NW_019170544.1	9544121	A	T	ENSAMXT00000044982	ENSAMXG00000019070	rorc	UTR_3	NONCODING	NA	NA	NA	NA	NA	NA	novel	NA
NW_019170544.1	9544128	G	A	ENSAMXT00000044982	ENSAMXG00000019070	rorc	UTR_3	NONCODING	NA	NA	NA	NA	NA	NA	novel	NA
NW_019170544.1	9544140	G	A	ENSAMXT00000044982	ENSAMXG00000019070	rorc	UTR_3	NONCODING	NA	NA	NA	NA	NA	NA	novel	NA
NW_019170544.1	9544149	T	TA	ENSAMXT00000044982	ENSAMXG00000019070	rorc	UTR_3	FRAMESHIFT INSERTION	NA	NA	NA	NA	NA	NA	NA	NA
NW_019170544.1	9544151	A	C	ENSAMXT00000044982	ENSAMXG00000019070	rorc	UTR_3	NONCODING	NA	NA	NA	NA	NA	NA	novel	NA
NW_019170544.1	9544156	C	T	ENSAMXT00000044982	ENSAMXG00000019070	rorc	UTR_3	NONCODING	NA	NA	NA	NA	NA	NA	novel	NA
NW_019170544.1	9544166	AC	A	ENSAMXT00000044982	ENSAMXG00000019070	rorc	UTR_3	FRAMESHIFT DELETION	NA	NA	NA	NA	NA	NA	NA	NA
NW_019170544.1	9544190	T	A	ENSAMXT00000044982	ENSAMXG00000019070	rorc	UTR_3	NONCODING	NA	NA	NA	NA	NA	NA	novel	NA
NW_019170544.1	9544191	T	TAA	ENSAMXT00000044982	ENSAMXG00000019070	rorc	UTR_3	FRAMESHIFT INSERTION	NA	NA	NA	NA	NA	NA	NA	NA
NW_019170544.1	9544192	T	A	ENSAMXT00000044982	ENSAMXG00000019070	rorc	UTR_3	NONCODING	NA	NA	NA	NA	NA	NA	novel	NA
NW_019170544.1	9544248	C	T	ENSAMXT00000044982	ENSAMXG00000019070	rorc	UTR_3	NONCODING	NA	NA	NA	NA	NA	NA	novel	NA
NW_019170544.1	9544260	A	C	ENSAMXT00000044982	ENSAMXG00000019070	rorc	UTR_3	NONCODING	NA	NA	NA	NA	NA	NA	novel	NA
NW_019170544.1	9544267	C	T	ENSAMXT00000044982	ENSAMXG00000019070	rorc	UTR_3	NONCODING	NA	NA	NA	NA	NA	NA	novel	NA
NW_019170544.1	9544268	AT	A	ENSAMXT00000044982	ENSAMXG00000019070	rorc	UTR_3	FRAMESHIFT DELETION	NA	NA	NA	NA	NA	NA	NA	NA
NW_019170544.1	9544274	GAC	G	ENSAMXT00000044982	ENSAMXG00000019070	rorc	UTR_3	FRAMESHIFT DELETION	NA	NA	NA	NA	NA	NA	NA	NA
NW_019170544.1	9544287	A	G	ENSAMXT00000044982	ENSAMXG00000019070	rorc	UTR_3	NONCODING	NA	NA	NA	NA	NA	NA	novel	NA
NW_019170544.1	9544295	A	G	ENSAMXT00000044982	ENSAMXG00000019070	rorc	UTR_3	NONCODING	NA	NA	NA	NA	NA	NA	novel	NA
NW_019170544.1	9544297	T	TC	ENSAMXT00000044982	ENSAMXG00000019070	rorc	UTR_3	FRAMESHIFT INSERTION	NA	NA	NA	NA	NA	NA	NA	NA
NW_019170544.1	9544299	A	T	ENSAMXT00000044982	ENSAMXG00000019070	rorc	UTR_3	NONCODING	NA	NA	NA	NA	NA	NA	novel	NA
NW_019170544.1	9544307	CTT	C	ENSAMXT00000044982	ENSAMXG00000019070	rorc	UTR_3	FRAMESHIFT DELETION	NA	NA	NA	NA	NA	NA	NA	NA
NW_019170544.1	9544314	A	T	ENSAMXT00000044982	ENSAMXG00000019070	rorc	UTR_3	NONCODING	NA	NA	NA	NA	NA	NA	novel	NA
NW_019170544.1	9544317	A	G	ENSAMXT00000044982	ENSAMXG00000019070	rorc	UTR_3	NONCODING	NA	NA	NA	NA	NA	NA	novel	NA
NW_019170544.1	9544319	GAA	G	ENSAMXT00000044982	ENSAMXG00000019070	rorc	UTR_3	FRAMESHIFT DELETION	NA	NA	NA	NA	NA	NA	NA	NA
NW_019170544.1	9544387	A	G	ENSAMXT00000019639	ENSAMXG00000019070	rorc	CDS	SYNONYMOUS	F	F	457	1	2.74	373	novel	TOLERATED
NW_019170544.1	9544450	C	T	ENSAMXT00000019639	ENSAMXG00000019070	rorc	CDS	SYNONYMOUS	A	A	436	0.18	2.74	374	novel	TOLERATED
NW_019170544.1	9544459	G	A	ENSAMXT00000019639	ENSAMXG00000019070	rorc	CDS	SYNONYMOUS	S	S	433	1	2.74	375	novel	TOLERATED
NW_019170544.1	9544472	G	A	ENSAMXT00000044982	ENSAMXG00000019070	rorc	CDS	NONSYNONYMOUS	T	I	432	0.01	2.8	386	novel	DELETERIOUS
NW_019170544.1	9544485	A	G	ENSAMXT00000019639	ENSAMXG00000019070	rorc	CDS	NONSYNONYMOUS	Y	H	425	0.31	2.75	376	novel	TOLERATED
NW_019170544.1	9544829	G	A	ENSAMXT00000044982	ENSAMXG00000019070	rorc	CDS	SYNONYMOUS	L	L	409	1	2.82	392	novel	TOLERATED
NW_019170544.1	9544851	T	C	ENSAMXT00000044982	ENSAMXG00000019070	rorc	CDS	SYNONYMOUS	L	L	401	0.04	2.8	392	novel	DELETERIOUS
NW_019170544.1	9545287	T	G	ENSAMXT00000019639	ENSAMXG00000019070	rorc	CDS	NONSYNONYMOUS	R	S	420	0.71	2.76	376	novel	TOLERATED
NW_019170544.1	9545289	T	TAA	ENSAMXT00000019639	ENSAMXG00000019070	rorc	CDS	FRAMESHIFT INSERTION	NA	NA	NA	NA	NA	NA	NA	NA
NW_019170544.1	9545291	CCCCT	C	ENSAMXT00000019639	ENSAMXG00000019070	rorc	CDS	FRAMESHIFT DELETION	NA	NA	NA	NA	NA	NA	NA	NA
NW_019170544.1	9545365	A	G	ENSAMXT00000019639	ENSAMXG00000019070	rorc	CDS	SYNONYMOUS	F	F	408	1	2.75	398	novel	TOLERATED
NW_019170544.1	9545370	G	C	ENSAMXT00000019639	ENSAMXG00000019070	rorc	CDS	NONSYNONYMOUS	L	V	407	0.03	2.75	397	novel	DELETERIOUS
NW_019170544.1	9545389	C	T	ENSAMXT00000019639	ENSAMXG00000019070	rorc	CDS	SYNONYMOUS	L	L	400	1	2.75	397	novel	TOLERATED
NW_019170544.1	9545391	G	A	ENSAMXT00000019639	ENSAMXG00000019070	rorc	CDS	SYNONYMOUS	L	L	400	1	2.75	397	novel	TOLERATED
NW_019170544.1	9545406	T	G	ENSAMXT00000019639	ENSAMXG00000019070	rorc	CDS	NONSYNONYMOUS	I	L	395	1	2.75	397	novel	TOLERATED
NW_019170544.1	9545419	G	A	ENSAMXT00000019639	ENSAMXG00000019070	rorc	CDS	SYNONYMOUS	D	D	390	1	2.75	398	novel	TOLERATED
NW_019170544.1	9545738	T	A	ENSAMXT00000019639	ENSAMXG00000019070	rorc	CDS	SYNONYMOUS	A	A	371	1	2.75	398	novel	TOLERATED
NW_019170544.1	9545738	T	C	ENSAMXT00000019639	ENSAMXG00000019070	rorc	CDS	SYNONYMOUS	A	A	371	1	2.75	398	novel	TOLERATED
NW_019170544.1	9545795	G	T	ENSAMXT00000019639	ENSAMXG00000019070	rorc	CDS	SYNONYMOUS	R	R	352	1	2.74	399	novel	TOLERATED
NW_019170544.1	9545797	G	T	ENSAMXT00000019639	ENSAMXG00000019070	rorc	CDS	NONSYNONYMOUS	R	S	352	0	2.74	399	novel	DELETERIOUS
NW_019170544.1	9546058	A	G	ENSAMXT00000019639	ENSAMXG00000019070	rorc	CDS	SYNONYMOUS	I	I	338	1	2.74	399	novel	TOLERATED
NW_019170544.1	9546076	G	A	ENSAMXT00000019639	ENSAMXG00000019070	rorc	CDS	SYNONYMOUS	L	L	332	1	2.74	399	novel	TOLERATED
NW_019170544.1	9546467	A	G	ENSAMXT00000019639	ENSAMXG00000019070	rorc	CDS	SYNONYMOUS	A	A	295	1	2.75	397	novel	TOLERATED
NW_019170544.1	9546479	C	T	ENSAMXT00000019639	ENSAMXG00000019070	rorc	CDS	SYNONYMOUS	E	E	291	1	2.74	398	novel	TOLERATED
NW_019170544.1	9546485	T	G	ENSAMXT00000019639	ENSAMXG00000019070	rorc	CDS	NONSYNONYMOUS	R	S	289	1	2.74	398	novel	TOLERATED
NW_019170544.1	9546514	C	T	ENSAMXT00000019639	ENSAMXG00000019070	rorc	CDS	NONSYNONYMOUS	V	I	280	0.01	2.74	398	novel	DELETERIOUS
NW_019170544.1	9546533	A	G	ENSAMXT00000019639	ENSAMXG00000019070	rorc	CDS	SYNONYMOUS	S	S	273	0.4	2.74	398	novel	TOLERATED
NW_019170544.1	9546551	G	A	ENSAMXT00000019639	ENSAMXG00000019070	rorc	CDS	SYNONYMOUS	R	R	267	0.35	2.74	398	novel	TOLERATED
NW_019170544.1	9546557	A	G	ENSAMXT00000019639	ENSAMXG00000019070	rorc	CDS	SYNONYMOUS	I	I	265	1	2.74	398	novel	TOLERATED
NW_019170544.1	9546925	T	C	ENSAMXT00000044982	ENSAMXG00000019070	rorc	CDS	NONSYNONYMOUS	H	R	230	0.04	2.81	393	novel	DELETERIOUS
NW_019170544.1	9546951	A	T	ENSAMXT00000019639	ENSAMXG00000019070	rorc	CDS	SYNONYMOUS	S	S	248	1	2.79	369	novel	TOLERATED
NW_019170544.1	9546971	G	T	ENSAMXT00000054516	ENSAMXG00000019070	rorc	CDS	NONSYNONYMOUS	P	T	242	0.05	2.7	352	novel	TOLERATED
NW_019170544.1	9546977	A	G	ENSAMXT00000019639	ENSAMXG00000019070	rorc	CDS	SYNONYMOUS	L	L	240	0.95	2.74	364	novel	TOLERATED
NW_019170544.1	9546978	C	T	ENSAMXT00000019639	ENSAMXG00000019070	rorc	CDS	SYNONYMOUS	G	G	239	1	2.74	381	novel	TOLERATED
NW_019170544.1	9546996	C	CT	ENSAMXT00000019639	ENSAMXG00000019070	rorc	CDS	FRAMESHIFT INSERTION	NA	NA	NA	NA	NA	NA	NA	NA
NW_019170544.1	9546996	C	T	ENSAMXT00000019639	ENSAMXG00000019070	rorc	CDS	NONSYNONYMOUS	M	I	233	0.43	2.8	326	novel	TOLERATED
NW_019170544.1	9546997	A	T	ENSAMXT00000019639	ENSAMXG00000019070	rorc	CDS	NONSYNONYMOUS	M	K	233	0.23	2.8	326	novel	TOLERATED
NW_019170544.1	9546999	G	GA	ENSAMXT00000019639	ENSAMXG00000019070	rorc	CDS	FRAMESHIFT INSERTION	NA	NA	NA	NA	NA	NA	NA	NA
NW_019170544.1	9547001	T	TC	ENSAMXT00000044982	ENSAMXG00000019070	rorc	CDS	FRAMESHIFT INSERTION	NA	NA	NA	NA	NA	NA	NA	NA
NW_019170544.1	9547004	G	GGA	ENSAMXT00000019639	ENSAMXG00000019070	rorc	CDS	FRAMESHIFT INSERTION	NA	NA	NA	NA	NA	NA	NA	NA
NW_019170544.1	9547007	T	TCCACTCCAGA	ENSAMXT00000019639	ENSAMXG00000019070	rorc	CDS	FRAMESHIFT INSERTION	NA	NA	NA	NA	NA	NA	NA	NA
NW_019170544.1	9547011	C	CA	ENSAMXT00000019639	ENSAMXG00000019070	rorc	CDS	FRAMESHIFT INSERTION	NA	NA	NA	NA	NA	NA	NA	NA
NW_019170544.1	9547014	T	C	ENSAMXT00000019639	ENSAMXG00000019070	rorc	CDS	SYNONYMOUS	P	P	227	1	2.81	381	novel	TOLERATED
NW_019170544.1	9547015	G	T	ENSAMXT00000044982	ENSAMXG00000019070	rorc	CDS	NONSYNONYMOUS	P	Q	200	0.08	2.86	357	novel	TOLERATED
NW_019170544.1	9547018	G	GCA	ENSAMXT00000044982	ENSAMXG00000019070	rorc	CDS	FRAMESHIFT INSERTION	NA	NA	NA	NA	NA	NA	NA	NA
NW_019170544.1	9547020	GGATCT	G	ENSAMXT00000044982	ENSAMXG00000019070	rorc	CDS	FRAMESHIFT DELETION	NA	NA	NA	NA	NA	NA	NA	NA
NW_019170544.1	9547028	T	TG	ENSAMXT00000019639	ENSAMXG00000019070	rorc	CDS	FRAMESHIFT INSERTION	NA	NA	NA	NA	NA	NA	NA	NA
NW_019170544.1	9547034	C	G	ENSAMXT00000019639	ENSAMXG00000019070	rorc	CDS	NONSYNONYMOUS	D	H	221	0.02	2.77	380	novel	DELETERIOUS
NW_019170544.1	9547565	A	T	ENSAMXT00000044982	ENSAMXG00000019070	rorc	CDS	NONSYNONYMOUS	C	S	186	0.44	2.82	238	novel	TOLERATED
NW_019170544.1	9547572	G	A	ENSAMXT00000044982	ENSAMXG00000019070	rorc	CDS	SYNONYMOUS	N	N	183	0.4	2.87	372	novel	TOLERATED
NW_019170544.1	9547588	A	G	ENSAMXT00000054516	ENSAMXG00000019070	rorc	CDS	NONSYNONYMOUS	V	A	205	0.55	2.77	344	novel	TOLERATED
NW_019170544.1	9547623	G	A	ENSAMXT00000019639	ENSAMXG00000019070	rorc	CDS	SYNONYMOUS	G	G	200	1	2.77	368	novel	TOLERATED
NW_019170544.1	9547645	C	G	ENSAMXT00000019639	ENSAMXG00000019070	rorc	CDS	NONSYNONYMOUS	G	A	193	0.21	2.74	366	novel	TOLERATED
NW_019170544.1	9547646	C	A	ENSAMXT00000044982	ENSAMXG00000019070	rorc	CDS	NONSYNONYMOUS	G	C	159	0.03	2.84	370	novel	DELETERIOUS
NW_019170544.1	9547647	G	A	ENSAMXT00000044982	ENSAMXG00000019070	rorc	CDS	SYNONYMOUS	H	H	158	0.78	2.83	353	novel	TOLERATED
NW_019170544.1	9547652	T	C	ENSAMXT00000019639	ENSAMXG00000019070	rorc	CDS	NONSYNONYMOUS	M	V	191	0.65	2.78	362	novel	TOLERATED
NW_019170544.1	9547658	G	A	ENSAMXT00000044982	ENSAMXG00000019070	rorc	CDS	NONSYNONYMOUS	P	S	155	0.22	2.9	336	novel	TOLERATED
NW_019170544.1	9547665	G	A	ENSAMXT00000019639	ENSAMXG00000019070	rorc	CDS	SYNONYMOUS	S	S	186	0.91	2.76	364	novel	TOLERATED
NW_019170544.1	9547667	T	C	ENSAMXT00000019639	ENSAMXG00000019070	rorc	CDS	NONSYNONYMOUS	S	G	186	0.39	2.76	364	novel	TOLERATED
NW_019170544.1	9547668	G	A	ENSAMXT00000019639	ENSAMXG00000019070	rorc	CDS	SYNONYMOUS	P	P	185	1	2.76	372	novel	TOLERATED
NW_019170544.1	9547688	A	G	ENSAMXT00000019639	ENSAMXG00000019070	rorc	CDS	NONSYNONYMOUS	S	P	179	0.18	2.79	358	novel	TOLERATED
NW_019170544.1	9547689	A	G	ENSAMXT00000019639	ENSAMXG00000019070	rorc	CDS	SYNONYMOUS	F	F	178	0.86	2.78	373	novel	TOLERATED
NW_019170544.1	9547690	A	T	ENSAMXT00000044982	ENSAMXG00000019070	rorc	CDS	NONSYNONYMOUS	F	Y	144	0.76	2.88	366	novel	TOLERATED
NW_019170544.1	9547695	G	A	ENSAMXT00000019639	ENSAMXG00000019070	rorc	CDS	SYNONYMOUS	Y	Y	176	1	2.78	379	novel	TOLERATED
NW_019170544.1	9547710	T	A	ENSAMXT00000019639	ENSAMXG00000019070	rorc	CDS	SYNONYMOUS	P	P	171	1	2.78	371	novel	TOLERATED
NW_019170544.1	9547716	A	G	ENSAMXT00000054516	ENSAMXG00000019070	rorc	CDS	SYNONYMOUS	I	I	162	0.6	2.7	237	novel	TOLERATED
NW_019170544.1	9547725	A	G	ENSAMXT00000019639	ENSAMXG00000019070	rorc	CDS	SYNONYMOUS	P	P	166	1	2.82	240	novel	TOLERATED
NW_019170544.1	9547731	G	A	ENSAMXT00000054516	ENSAMXG00000019070	rorc	CDS	SYNONYMOUS	R	R	157	0.73	2.73	350	novel	TOLERATED
NW_019170544.1	9547732	C	T	ENSAMXT00000044982	ENSAMXG00000019070	rorc	CDS	NONSYNONYMOUS	R	H	130	0.16	2.86	349	novel	TOLERATED
NW_019170544.1	9547772	G	A	ENSAMXT00000019639	ENSAMXG00000019070	rorc	CDS	NONSYNONYMOUS	P	S	151	0.36	2.79	235	novel	TOLERATED
NW_019170544.1	9547778	G	T	ENSAMXT00000019639	ENSAMXG00000019070	rorc	CDS	NONSYNONYMOUS	P	T	149	0.2	2.82	241	novel	TOLERATED
NW_019170544.1	9547782	T	C	ENSAMXT00000044982	ENSAMXG00000019070	rorc	CDS	SYNONYMOUS	T	T	113	0.67	2.78	260	novel	TOLERATED
NW_019170544.1	9547793	T	C	ENSAMXT00000019639	ENSAMXG00000019070	rorc	CDS	NONSYNONYMOUS	T	A	144	0.86	2.82	267	novel	TOLERATED
NW_019170544.1	9547800	A	G	ENSAMXT00000019639	ENSAMXG00000019070	rorc	CDS	SYNONYMOUS	R	R	141	0.55	2.8	375	novel	TOLERATED
NW_019170544.1	9547801	CGCT	C	ENSAMXT00000019639	ENSAMXG00000019070	rorc	CDS	NONFRAMESHIFT DELETION	NA	NA	NA	NA	NA	NA	NA	NA
NW_019170544.1	9547801	CGCT	CGCTGCT	ENSAMXT00000019639	ENSAMXG00000019070	rorc	CDS	SUBSTITUTION	NA	NA	NA	NA	NA	NA	NA	NA
NW_019170544.1	9547810	T	C	ENSAMXT00000019639	ENSAMXG00000019070	rorc	CDS	NONSYNONYMOUS	Q	R	138	0.06	2.75	389	novel	TOLERATED
NW_019170544.1	9547810	T	TGCTGCC	ENSAMXT00000019639	ENSAMXG00000019070	rorc	CDS	NONFRAMESHIFT INSERTION	NA	NA	NA	NA	NA	NA	NA	NA
NW_019170544.1	9549456	A	G	ENSAMXT00000044982	ENSAMXG00000019070	rorc	CDS	SYNONYMOUS	V	V	72	0.13	2.8	393	novel	TOLERATED
NW_019170544.1	9549501	G	A	ENSAMXT00000019639	ENSAMXG00000019070	rorc	CDS	SYNONYMOUS	R	R	91	1	2.74	393	novel	TOLERATED
NW_019170544.1	9549528	A	T	ENSAMXT00000019639	ENSAMXG00000019070	rorc	CDS	SYNONYMOUS	S	S	82	1	2.74	392	novel	TOLERATED
NW_019170544.1	9549531	A	G	ENSAMXT00000019639	ENSAMXG00000019070	rorc	CDS	SYNONYMOUS	C	C	81	1	2.74	392	novel	TOLERATED
NW_019170544.1	9549537	A	G	ENSAMXT00000019639	ENSAMXG00000019070	rorc	CDS	SYNONYMOUS	Y	Y	79	1	2.74	393	novel	TOLERATED
NW_019170544.1	9549540	C	T	ENSAMXT00000044982	ENSAMXG00000019070	rorc	CDS	SYNONYMOUS	Q	Q	44	0.14	2.8	392	novel	TOLERATED
NW_019170544.1	9549549	A	G	ENSAMXT00000044982	ENSAMXG00000019070	rorc	CDS	SYNONYMOUS	S	S	41	0.94	2.8	393	novel	TOLERATED
NW_019170544.1	9549561	C	G	ENSAMXT00000019639	ENSAMXG00000019070	rorc	CDS	SYNONYMOUS	R	R	71	1	2.74	394	novel	TOLERATED
NW_019170544.1	9549573	T	A	ENSAMXT00000019639	ENSAMXG00000019070	rorc	CDS	SYNONYMOUS	G	G	67	1	2.74	395	novel	TOLERATED
NW_019170544.1	9549694	G	A	ENSAMXT00000019639	ENSAMXG00000019070	rorc	CDS	SYNONYMOUS	C	C	62	1	2.76	393	novel	TOLERATED
NW_019170544.1	9549697	A	G	ENSAMXT00000019639	ENSAMXG00000019070	rorc	CDS	SYNONYMOUS	T	T	61	1	2.76	393	novel	TOLERATED
NW_019170544.1	9549700	T	A	ENSAMXT00000019639	ENSAMXG00000019070	rorc	CDS	SYNONYMOUS	I	I	60	1	2.76	393	novel	TOLERATED
NW_019170544.1	9549700	T	G	ENSAMXT00000019639	ENSAMXG00000019070	rorc	CDS	SYNONYMOUS	I	I	60	1	2.76	393	novel	TOLERATED
NW_019170544.1	9549712	A	G	ENSAMXT00000019639	ENSAMXG00000019070	rorc	CDS	SYNONYMOUS	H	H	56	1	2.76	393	novel	TOLERATED
NW_019170544.1	9549730	A	G	ENSAMXT00000019639	ENSAMXG00000019070	rorc	CDS	SYNONYMOUS	D	D	50	1	2.76	392	novel	TOLERATED
NW_019170544.1	9554413	TCTTTC	T	ENSAMXT00000019639	ENSAMXG00000019070	rorc	CDS	FRAMESHIFT DELETION	NA	NA	NA	NA	NA	NA	NA	NA
NW_019170544.1	9554426	C	G	ENSAMXT00000019639	ENSAMXG00000019070	rorc	CDS	NONSYNONYMOUS	V	L	33	0.69	2.99	98	novel	TOLERATED
NW_019170544.1	9554476	C	A	ENSAMXT00000019639	ENSAMXG00000019070	rorc	CDS	NONSYNONYMOUS	R	I	16	0.21	3.14	37	novel	TOLERATED
NW_019170544.1	9554509	T	C	ENSAMXT00000019639	ENSAMXG00000019070	rorc	CDS	NONSYNONYMOUS	D	G	5	0.02	3.53	10	novel	DELETERIOUS (*WARNING! Low confidence)
NW_019170544.1	9565405	C	T	ENSAMXT00000044982	ENSAMXG00000019070	rorc	UTR_5	NONCODING	NA	NA	NA	NA	NA	NA	novel	NA
NW_019170544.1	9565470	A	G	ENSAMXT00000044982	ENSAMXG00000019070	rorc	UTR_5	NONCODING	NA	NA	NA	NA	NA	NA	novel	NA
NW_019170544.1	9565478	T	G	ENSAMXT00000044982	ENSAMXG00000019070	rorc	UTR_5	NONCODING	NA	NA	NA	NA	NA	NA	novel	NA
NW_019170544.1	9565511	G	C	ENSAMXT00000044982	ENSAMXG00000019070	rorc	UTR_5	NONCODING	NA	NA	NA	NA	NA	NA	novel	NA
NW_019170544.1	9565549	G	A	ENSAMXT00000044982	ENSAMXG00000019070	rorc	UTR_5	NONCODING	NA	NA	NA	NA	NA	NA	novel	NA
NW_019170544.1	9565588	G	A	ENSAMXT00000044982	ENSAMXG00000019070	rorc	UTR_5	NONCODING	NA	NA	NA	NA	NA	NA	novel	NA
NW_019170544.1	9565614	A	G	ENSAMXT00000044982	ENSAMXG00000019070	rorc	UTR_5	NONCODING	NA	NA	NA	NA	NA	NA	novel	NA
NW_019170544.1	9565632	GTCTCTCTCTCTCTC	GTCTCTCTCTCTCTCTCTC	ENSAMXT00000044982	ENSAMXG00000019070	rorc	UTR_5	FRAMESHIFT INSERTION	NA	NA	NA	NA	NA	NA	NA	NA
NW_019170544.1	9565632	GTCTCTCTCTCTCTC	G	ENSAMXT00000044982	ENSAMXG00000019070	rorc	UTR_5	FRAMESHIFT DELETION	NA	NA	NA	NA	NA	NA	NA	NA
NW_019170544.1	9565632	GTCTCTCTCTCTCTC	GTCTCTCTCTCTCTCTCTCTCTC	ENSAMXT00000044982	ENSAMXG00000019070	rorc	UTR_5	FRAMESHIFT INSERTION	NA	NA	NA	NA	NA	NA	NA	NA
NW_019170544.1	9565632	GTCTCTCTCTCTCTC	GTCTC	ENSAMXT00000044982	ENSAMXG00000019070	rorc	UTR_5	FRAMESHIFT DELETION	NA	NA	NA	NA	NA	NA	NA	NA
NW_019170544.1	9565632	GTCTCTCTCTCTCTC	GTCTCTCTCTCTCTCTCTCTCTCTCTCTCTC	ENSAMXT00000044982	ENSAMXG00000019070	rorc	UTR_5	FRAMESHIFT INSERTION	NA	NA	NA	NA	NA	NA	NA	NA
NW_019170544.1	9565632	GTCTCTCTCTCTCTC	GCGCCTGCTTATTCTCTCTCTCTCTC	ENSAMXT00000044982	ENSAMXG00000019070	rorc	UTR_5	FRAMESHIFT INSERTION	NA	NA	NA	NA	NA	NA	NA	NA
NW_019170544.1	9565632	GTCTCTCTCTCTCTC	GTCTCTCTC	ENSAMXT00000044982	ENSAMXG00000019070	rorc	UTR_5	SUBSTITUTION	NA	NA	NA	NA	NA	NA	NA	NA
NW_019170544.1	9565632	GTCTCTCTCTCTCTC	GTCTCTCTCTCTCTCTC	ENSAMXT00000044982	ENSAMXG00000019070	rorc	UTR_5	FRAMESHIFT INSERTION	NA	NA	NA	NA	NA	NA	NA	NA
NW_019170544.1	9565632	GTCTCTCTCTCTCTC	GTCTCTCTCTC	ENSAMXT00000044982	ENSAMXG00000019070	rorc	UTR_5	FRAMESHIFT DELETION	NA	NA	NA	NA	NA	NA	NA	NA
NW_019170544.1	9565632	GTCTCTCTCTCTCTC	GTCTCTCTCTCTC	ENSAMXT00000044982	ENSAMXG00000019070	rorc	UTR_5	FRAMESHIFT DELETION	NA	NA	NA	NA	NA	NA	NA	NA
NW_019170544.1	9565632	GTCTCTCTCTCTCTC	GTCTCTCTCTCTCTCTCTCTCTCTCTCTC	ENSAMXT00000044982	ENSAMXG00000019070	rorc	UTR_5	FRAMESHIFT INSERTION	NA	NA	NA	NA	NA	NA	NA	NA
NW_019170544.1	9565632	GTCTCTCTCTCTCTC	GTC	ENSAMXT00000044982	ENSAMXG00000019070	rorc	UTR_5	SUBSTITUTION	NA	NA	NA	NA	NA	NA	NA	NA
NW_019170544.1	9565632	GTCTCTCTCTCTCTC	GTCTCTCTCTCTCTCTCTCTC	ENSAMXT00000044982	ENSAMXG00000019070	rorc	UTR_5	SUBSTITUTION	NA	NA	NA	NA	NA	NA	NA	NA
NW_019170544.1	9565632	GTCTCTCTCTCTCTC	GTCTCTCTCTCTCTCTCTCTCTCTCTC	ENSAMXT00000044982	ENSAMXG00000019070	rorc	UTR_5	SUBSTITUTION	NA	NA	NA	NA	NA	NA	NA	NA
NW_019170544.1	9565632	GTCTCTCTCTCTCTC	GTCTCTC	ENSAMXT00000044982	ENSAMXG00000019070	rorc	UTR_5	FRAMESHIFT DELETION	NA	NA	NA	NA	NA	NA	NA	NA
NW_019170544.1	9565632	GTCTCTCTCTCTCTC	GTCTCTCTCTCTCTCTCTCTCTCTC	ENSAMXT00000044982	ENSAMXG00000019070	rorc	UTR_5	FRAMESHIFT INSERTION	NA	NA	NA	NA	NA	NA	NA	NA
NW_019170544.1	9581639	C	T	ENSAMXT00000054516	ENSAMXG00000019070	rorc	CDS	NONSYNONYMOUS	D	N	5	0.08	3.09	63	novel	TOLERATED
NW_019170544.1	11547881	A	ACGCTGC	ENSAMXT00000019180	ENSAMXG00000018629	NA	UTR_3	NONFRAMESHIFT INSERTION	NA	NA	NA	NA	NA	NA	NA	NA
NW_019170544.1	11547881	A	AT	ENSAMXT00000019180	ENSAMXG00000018629	NA	UTR_3	FRAMESHIFT INSERTION	NA	NA	NA	NA	NA	NA	NA	NA
NW_019170544.1	11547882	A	AAAAAAC	ENSAMXT00000019180	ENSAMXG00000018629	NA	UTR_3	NONFRAMESHIFT INSERTION	NA	NA	NA	NA	NA	NA	NA	NA
NW_019170544.1	11547885	A	AAAC	ENSAMXT00000019180	ENSAMXG00000018629	NA	UTR_3	NONFRAMESHIFT INSERTION	NA	NA	NA	NA	NA	NA	NA	NA
NW_019170544.1	11547890	A	T	ENSAMXT00000019180	ENSAMXG00000018629	NA	UTR_3	NONCODING	NA	NA	NA	NA	NA	NA	novel	NA
NW_019170544.1	11547921	A	C	ENSAMXT00000019180	ENSAMXG00000018629	NA	UTR_3	NONCODING	NA	NA	NA	NA	NA	NA	novel	NA
NW_019170544.1	11547927	CA	C	ENSAMXT00000019180	ENSAMXG00000018629	NA	UTR_3	FRAMESHIFT DELETION	NA	NA	NA	NA	NA	NA	NA	NA
NW_019170544.1	11547938	A	ACTTTTGT	ENSAMXT00000019180	ENSAMXG00000018629	NA	UTR_3	FRAMESHIFT INSERTION	NA	NA	NA	NA	NA	NA	NA	NA
NW_019170544.1	11547938	A	ACTTTTGTTCACTTTTGATCCACCCTTTTTAGATTACGGGAGATTTTATC	ENSAMXT00000019180	ENSAMXG00000018629	NA	UTR_3	FRAMESHIFT INSERTION	NA	NA	NA	NA	NA	NA	NA	NA
NW_019170544.1	11547938	A	ACTTTTGTTCACTTTTGATCCACCC	ENSAMXT00000019180	ENSAMXG00000018629	NA	UTR_3	NONFRAMESHIFT INSERTION	NA	NA	NA	NA	NA	NA	NA	NA
NW_019170544.1	11547938	A	ACTTTTGTTCACTTTTGAGCCACCCTTTTTAGATTACGGGAGATTTTATCTGAC	ENSAMXT00000019180	ENSAMXG00000018629	NA	UTR_3	FRAMESHIFT INSERTION	NA	NA	NA	NA	NA	NA	NA	NA
NW_019170544.1	11547940	C	CACTTTTGAGCCACCCTTTTTAGATTACGGGAGATTTTATCTG	ENSAMXT00000019180	ENSAMXG00000018629	NA	UTR_3	NONFRAMESHIFT INSERTION	NA	NA	NA	NA	NA	NA	NA	NA
NW_019170544.1	11547940	C	CACTTTTGAGCCACCCTTTTTAGATTACGGGAGATTTT	ENSAMXT00000019180	ENSAMXG00000018629	NA	UTR_3	FRAMESHIFT INSERTION	NA	NA	NA	NA	NA	NA	NA	NA
NW_019170544.1	11548019	A	T	ENSAMXT00000019180	ENSAMXG00000018629	NA	UTR_3	NONCODING	NA	NA	NA	NA	NA	NA	novel	NA
NW_019170544.1	11548065	T	C	ENSAMXT00000019180	ENSAMXG00000018629	NA	UTR_3	NONCODING	NA	NA	NA	NA	NA	NA	novel	NA
NW_019170544.1	11548072	G	A	ENSAMXT00000019180	ENSAMXG00000018629	NA	UTR_3	NONCODING	NA	NA	NA	NA	NA	NA	novel	NA
NW_019170544.1	11548072	G	C	ENSAMXT00000019180	ENSAMXG00000018629	NA	UTR_3	NONCODING	NA	NA	NA	NA	NA	NA	novel	NA
NW_019170544.1	11548075	C	T	ENSAMXT00000019180	ENSAMXG00000018629	NA	UTR_3	NONCODING	NA	NA	NA	NA	NA	NA	novel	NA
NW_019170544.1	11548080	CCCATCCAGGAGGGGGAAAAAAAAAA	TCCATCCAGGAGGGGGAAAAAAAAAA	ENSAMXT00000019180	ENSAMXG00000018629	NA	UTR_3	SUBSTITUTION	NA	NA	NA	NA	NA	NA	NA	NA
NW_019170544.1	11548080	CCCATCCAGGAGGGGGAAAAAAAAAA	C	ENSAMXT00000019180	ENSAMXG00000018629	NA	UTR_3	FRAMESHIFT DELETION	NA	NA	NA	NA	NA	NA	NA	NA
NW_019170544.1	11548082	C	T	ENSAMXT00000019180	ENSAMXG00000018629	NA	UTR_3	NONCODING	NA	NA	NA	NA	NA	NA	novel	NA
NW_019170544.1	11548090	AGG	A	ENSAMXT00000019180	ENSAMXG00000018629	NA	UTR_3	FRAMESHIFT DELETION	NA	NA	NA	NA	NA	NA	NA	NA
NW_019170544.1	11548090	AGG	AG	ENSAMXT00000019180	ENSAMXG00000018629	NA	UTR_3	FRAMESHIFT DELETION	NA	NA	NA	NA	NA	NA	NA	NA
NW_019170544.1	11548093	GGGAAAAAAAAAAA	GAAAAAA	ENSAMXT00000019180	ENSAMXG00000018629	NA	UTR_3	FRAMESHIFT DELETION	NA	NA	NA	NA	NA	NA	NA	NA
NW_019170544.1	11548093	GGGAAAAAAAAAAA	GAAAAAAAAAA	ENSAMXT00000019180	ENSAMXG00000018629	NA	UTR_3	SUBSTITUTION	NA	NA	NA	NA	NA	NA	NA	NA
NW_019170544.1	11548093	GGGAAAAAAAAAAA	GAAAAAAAAA	ENSAMXT00000019180	ENSAMXG00000018629	NA	UTR_3	FRAMESHIFT DELETION	NA	NA	NA	NA	NA	NA	NA	NA
NW_019170544.1	11548093	GGGAAAAAAAAAAA	G	ENSAMXT00000019180	ENSAMXG00000018629	NA	UTR_3	FRAMESHIFT DELETION	NA	NA	NA	NA	NA	NA	NA	NA
NW_019170544.1	11548093	GGGAAAAAAAAAAA	GAAAAAAAA	ENSAMXT00000019180	ENSAMXG00000018629	NA	UTR_3	FRAMESHIFT DELETION	NA	NA	NA	NA	NA	NA	NA	NA
NW_019170544.1	11548093	GGGAAAAAAAAAAA	GAAAAAAA	ENSAMXT00000019180	ENSAMXG00000018629	NA	UTR_3	SUBSTITUTION	NA	NA	NA	NA	NA	NA	NA	NA
NW_019170544.1	11548094	GGAAAAAAAAAA	GAAAA	ENSAMXT00000019180	ENSAMXG00000018629	NA	UTR_3	FRAMESHIFT DELETION	NA	NA	NA	NA	NA	NA	NA	NA
NW_019170544.1	11548094	GGAAAAAAAAAA	GAAAAAA	ENSAMXT00000019180	ENSAMXG00000018629	NA	UTR_3	FRAMESHIFT DELETION	NA	NA	NA	NA	NA	NA	NA	NA
NW_019170544.1	11548094	GGAAAAAAAAAA	GAAAAA	ENSAMXT00000019180	ENSAMXG00000018629	NA	UTR_3	SUBSTITUTION	NA	NA	NA	NA	NA	NA	NA	NA
NW_019170544.1	11548094	GGAAAAAAAAAA	GAA	ENSAMXT00000019180	ENSAMXG00000018629	NA	UTR_3	SUBSTITUTION	NA	NA	NA	NA	NA	NA	NA	NA
NW_019170544.1	11548094	GGAAAAAAAAAA	G	ENSAMXT00000019180	ENSAMXG00000018629	NA	UTR_3	FRAMESHIFT DELETION	NA	NA	NA	NA	NA	NA	NA	NA
NW_019170544.1	11548094	GGAAAAAAAAAA	GAAAAAAAAA	ENSAMXT00000019180	ENSAMXG00000018629	NA	UTR_3	FRAMESHIFT DELETION	NA	NA	NA	NA	NA	NA	NA	NA
NW_019170544.1	11548094	GGAAAAAAAAAA	GA	ENSAMXT00000019180	ENSAMXG00000018629	NA	UTR_3	FRAMESHIFT DELETION	NA	NA	NA	NA	NA	NA	NA	NA
NW_019170544.1	11548094	GGAAAAAAAAAA	GAAA	ENSAMXT00000019180	ENSAMXG00000018629	NA	UTR_3	FRAMESHIFT DELETION	NA	NA	NA	NA	NA	NA	NA	NA
NW_019170544.1	11548094	GGAAAAAAAAAA	GAAAAAAAA	ENSAMXT00000019180	ENSAMXG00000018629	NA	UTR_3	SUBSTITUTION	NA	NA	NA	NA	NA	NA	NA	NA
NW_019170544.1	11548094	GGAAAAAAAAAA	GAAAAAAA	ENSAMXT00000019180	ENSAMXG00000018629	NA	UTR_3	FRAMESHIFT DELETION	NA	NA	NA	NA	NA	NA	NA	NA
NW_019170544.1	11548095	GAAAAAAAAAA	GAA	ENSAMXT00000019180	ENSAMXG00000018629	NA	UTR_3	FRAMESHIFT DELETION	NA	NA	NA	NA	NA	NA	NA	NA
NW_019170544.1	11548095	GAAAAAAAAAA	AAAAAAAAAAA	ENSAMXT00000019180	ENSAMXG00000018629	NA	UTR_3	SUBSTITUTION	NA	NA	NA	NA	NA	NA	NA	NA
NW_019170544.1	11548095	GAAAAAAAAAA	G	ENSAMXT00000019180	ENSAMXG00000018629	NA	UTR_3	FRAMESHIFT DELETION	NA	NA	NA	NA	NA	NA	NA	NA
NW_019170544.1	11548095	GAAAAAAAAAA	GA	ENSAMXT00000019180	ENSAMXG00000018629	NA	UTR_3	SUBSTITUTION	NA	NA	NA	NA	NA	NA	NA	NA
NW_019170544.1	11548106	A	C	ENSAMXT00000019180	ENSAMXG00000018629	NA	UTR_3	NONCODING	NA	NA	NA	NA	NA	NA	novel	NA
NW_019170544.1	11548106	A	T	ENSAMXT00000019180	ENSAMXG00000018629	NA	UTR_3	NONCODING	NA	NA	NA	NA	NA	NA	novel	NA
NW_019170544.1	11548107	A	ATT	ENSAMXT00000019180	ENSAMXG00000018629	NA	UTR_3	FRAMESHIFT INSERTION	NA	NA	NA	NA	NA	NA	NA	NA
NW_019170544.1	11548107	A	C	ENSAMXT00000019180	ENSAMXG00000018629	NA	UTR_3	NONCODING	NA	NA	NA	NA	NA	NA	novel	NA
NW_019170544.1	11548107	A	T	ENSAMXT00000019180	ENSAMXG00000018629	NA	UTR_3	NONCODING	NA	NA	NA	NA	NA	NA	novel	NA
NW_019170544.1	11548108	AAAAAAAAAACACTGTCCGCTCACACT	A	ENSAMXT00000019180	ENSAMXG00000018629	NA	UTR_3	FRAMESHIFT DELETION	NA	NA	NA	NA	NA	NA	NA	NA
NW_019170544.1	11548108	AAAAAAAAAACACTGTCCGCTCACACT	ATTAAAAAAAAACACTGTCCGCTCACACT	ENSAMXT00000019180	ENSAMXG00000018629	NA	UTR_3	FRAMESHIFT INSERTION	NA	NA	NA	NA	NA	NA	NA	NA
NW_019170544.1	11548108	AAAAAAAAAACACTGTCCGCTCACACT	TAAAAAAAAACACTGTCCGCTCACACT	ENSAMXT00000019180	ENSAMXG00000018629	NA	UTR_3	SUBSTITUTION	NA	NA	NA	NA	NA	NA	NA	NA
NW_019170544.1	11548112	A	T	ENSAMXT00000019180	ENSAMXG00000018629	NA	UTR_3	NONCODING	NA	NA	NA	NA	NA	NA	novel	NA
NW_019170544.1	11548113	A	T	ENSAMXT00000019180	ENSAMXG00000018629	NA	UTR_3	NONCODING	NA	NA	NA	NA	NA	NA	novel	NA
NW_019170544.1	11548117	A	C	ENSAMXT00000019180	ENSAMXG00000018629	NA	UTR_3	NONCODING	NA	NA	NA	NA	NA	NA	novel	NA
NW_019170544.1	11548125	C	T	ENSAMXT00000019180	ENSAMXG00000018629	NA	UTR_3	NONCODING	NA	NA	NA	NA	NA	NA	novel	NA
NW_019170544.1	11548135	A	T	ENSAMXT00000019180	ENSAMXG00000018629	NA	UTR_3	NONCODING	NA	NA	NA	NA	NA	NA	novel	NA
NW_019170544.1	11548193	T	A	ENSAMXT00000019180	ENSAMXG00000018629	NA	UTR_3	NONCODING	NA	NA	NA	NA	NA	NA	novel	NA
NW_019170544.1	11548195	T	C	ENSAMXT00000019180	ENSAMXG00000018629	NA	UTR_3	NONCODING	NA	NA	NA	NA	NA	NA	novel	NA
NW_019170544.1	11548204	TGC	T	ENSAMXT00000019180	ENSAMXG00000018629	NA	UTR_3	FRAMESHIFT DELETION	NA	NA	NA	NA	NA	NA	NA	NA
NW_019170544.1	11548209	TTCATAAATATGCACACAAGGGGAGCCCCTTTCCTCTCCCTC	T	ENSAMXT00000019180	ENSAMXG00000018629	NA	UTR_3	FRAMESHIFT DELETION	NA	NA	NA	NA	NA	NA	NA	NA
NW_019170544.1	11548216	A	T	ENSAMXT00000019180	ENSAMXG00000018629	NA	UTR_3	NONCODING	NA	NA	NA	NA	NA	NA	novel	NA
NW_019170544.1	11548259	TC	T	ENSAMXT00000019180	ENSAMXG00000018629	NA	UTR_3	FRAMESHIFT DELETION	NA	NA	NA	NA	NA	NA	NA	NA
NW_019170544.1	11548260	C	T	ENSAMXT00000019180	ENSAMXG00000018629	NA	UTR_3	NONCODING	NA	NA	NA	NA	NA	NA	novel	NA
NW_019170544.1	11548272	TAAAA	T	ENSAMXT00000019180	ENSAMXG00000018629	NA	UTR_3	FRAMESHIFT DELETION	NA	NA	NA	NA	NA	NA	NA	NA
NW_019170544.1	11548272	TAAAA	TAAAAA	ENSAMXT00000019180	ENSAMXG00000018629	NA	UTR_3	FRAMESHIFT INSERTION	NA	NA	NA	NA	NA	NA	NA	NA
NW_019170544.1	11548272	TAAAA	TAA	ENSAMXT00000019180	ENSAMXG00000018629	NA	UTR_3	FRAMESHIFT DELETION	NA	NA	NA	NA	NA	NA	NA	NA
NW_019170544.1	11548272	TAAAA	TAAA	ENSAMXT00000019180	ENSAMXG00000018629	NA	UTR_3	FRAMESHIFT DELETION	NA	NA	NA	NA	NA	NA	NA	NA
NW_019170544.1	11548272	TAAAA	TA	ENSAMXT00000019180	ENSAMXG00000018629	NA	UTR_3	SUBSTITUTION	NA	NA	NA	NA	NA	NA	NA	NA
NW_019170544.1	11548306	T	G	ENSAMXT00000019180	ENSAMXG00000018629	NA	UTR_3	NONCODING	NA	NA	NA	NA	NA	NA	novel	NA
NW_019170544.1	11548322	TTGATCCACCCTTTTTAGATTACGGGAGATTTTATC	T	ENSAMXT00000019180	ENSAMXG00000018629	NA	UTR_3	FRAMESHIFT DELETION	NA	NA	NA	NA	NA	NA	NA	NA
NW_019170544.1	11548348	A	T	ENSAMXT00000019180	ENSAMXG00000018629	NA	UTR_3	NONCODING	NA	NA	NA	NA	NA	NA	novel	NA
NW_019170544.1	11548362	T	TTCATATATATA	ENSAMXT00000019180	ENSAMXG00000018629	NA	UTR_3	FRAMESHIFT INSERTION	NA	NA	NA	NA	NA	NA	NA	NA
NW_019170544.1	11548365	C	T	ENSAMXT00000019180	ENSAMXG00000018629	NA	UTR_3	NONCODING	NA	NA	NA	NA	NA	NA	novel	NA
NW_019170544.1	11548365	C	CCAT	ENSAMXT00000019180	ENSAMXG00000018629	NA	UTR_3	NONFRAMESHIFT INSERTION	NA	NA	NA	NA	NA	NA	NA	NA
NW_019170544.1	11548366	G	A	ENSAMXT00000019180	ENSAMXG00000018629	NA	UTR_3	NONCODING	NA	NA	NA	NA	NA	NA	novel	NA
NW_019170544.1	11548366	G	GATCT	ENSAMXT00000019180	ENSAMXG00000018629	NA	UTR_3	FRAMESHIFT INSERTION	NA	NA	NA	NA	NA	NA	NA	NA
NW_019170544.1	11548368	GC	G	ENSAMXT00000019180	ENSAMXG00000018629	NA	UTR_3	FRAMESHIFT DELETION	NA	NA	NA	NA	NA	NA	NA	NA
NW_019170544.1	11548381	G	A	ENSAMXT00000019180	ENSAMXG00000018629	NA	UTR_3	NONCODING	NA	NA	NA	NA	NA	NA	novel	NA
NW_019170544.1	11548393	C	A	ENSAMXT00000019180	ENSAMXG00000018629	NA	UTR_3	NONCODING	NA	NA	NA	NA	NA	NA	novel	NA
NW_019170544.1	11548395	G	A	ENSAMXT00000019180	ENSAMXG00000018629	NA	UTR_3	NONCODING	NA	NA	NA	NA	NA	NA	novel	NA
NW_019170544.1	11548428	AAATTTCACTTAACT	A	ENSAMXT00000019180	ENSAMXG00000018629	NA	UTR_3	FRAMESHIFT DELETION	NA	NA	NA	NA	NA	NA	NA	NA
NW_019170544.1	11548450	C	A	ENSAMXT00000019180	ENSAMXG00000018629	NA	UTR_3	NONCODING	NA	NA	NA	NA	NA	NA	novel	NA
NW_019170544.1	11548454	T	A	ENSAMXT00000019180	ENSAMXG00000018629	NA	UTR_3	NONCODING	NA	NA	NA	NA	NA	NA	novel	NA
NW_019170544.1	11548458	T	C	ENSAMXT00000019180	ENSAMXG00000018629	NA	UTR_3	NONCODING	NA	NA	NA	NA	NA	NA	novel	NA
NW_019170544.1	11548462	C	A	ENSAMXT00000019180	ENSAMXG00000018629	NA	UTR_3	NONCODING	NA	NA	NA	NA	NA	NA	novel	NA
NW_019170544.1	11548463	A	T	ENSAMXT00000019180	ENSAMXG00000018629	NA	UTR_3	NONCODING	NA	NA	NA	NA	NA	NA	novel	NA
NW_019170544.1	11548475	A	T	ENSAMXT00000019180	ENSAMXG00000018629	NA	UTR_3	NONCODING	NA	NA	NA	NA	NA	NA	novel	NA
NW_019170544.1	11548479	T	G	ENSAMXT00000019180	ENSAMXG00000018629	NA	UTR_3	NONCODING	NA	NA	NA	NA	NA	NA	novel	NA
NW_019170544.1	11548490	G	A	ENSAMXT00000019180	ENSAMXG00000018629	NA	UTR_3	NONCODING	NA	NA	NA	NA	NA	NA	novel	NA
NW_019170544.1	11548500	G	A	ENSAMXT00000019180	ENSAMXG00000018629	NA	UTR_3	NONCODING	NA	NA	NA	NA	NA	NA	novel	NA
NW_019170544.1	11548506	C	A	ENSAMXT00000019180	ENSAMXG00000018629	NA	UTR_3	NONCODING	NA	NA	NA	NA	NA	NA	novel	NA
NW_019170544.1	11548530	CTG	C	ENSAMXT00000019180	ENSAMXG00000018629	NA	UTR_3	FRAMESHIFT DELETION	NA	NA	NA	NA	NA	NA	NA	NA
NW_019170544.1	11548534	CAA	C	ENSAMXT00000019180	ENSAMXG00000018629	NA	UTR_3	FRAMESHIFT DELETION	NA	NA	NA	NA	NA	NA	NA	NA
NW_019170544.1	11548542	C	T	ENSAMXT00000019180	ENSAMXG00000018629	NA	UTR_3	NONCODING	NA	NA	NA	NA	NA	NA	novel	NA
NW_019170544.1	11548542	C	G	ENSAMXT00000019180	ENSAMXG00000018629	NA	UTR_3	NONCODING	NA	NA	NA	NA	NA	NA	novel	NA
NW_019170544.1	11548586	T	G	ENSAMXT00000019180	ENSAMXG00000018629	NA	UTR_3	NONCODING	NA	NA	NA	NA	NA	NA	novel	NA
NW_019170544.1	11548605	A	C	ENSAMXT00000019180	ENSAMXG00000018629	NA	UTR_3	NONCODING	NA	NA	NA	NA	NA	NA	novel	NA
NW_019170544.1	11548618	C	A	ENSAMXT00000019180	ENSAMXG00000018629	NA	UTR_3	NONCODING	NA	NA	NA	NA	NA	NA	novel	NA
NW_019170544.1	11548641	A	G	ENSAMXT00000019180	ENSAMXG00000018629	NA	UTR_3	NONCODING	NA	NA	NA	NA	NA	NA	novel	NA
NW_019170544.1	11548645	C	T	ENSAMXT00000019180	ENSAMXG00000018629	NA	UTR_3	NONCODING	NA	NA	NA	NA	NA	NA	novel	NA
NW_019170544.1	11548679	C	A	ENSAMXT00000019180	ENSAMXG00000018629	NA	UTR_3	NONCODING	NA	NA	NA	NA	NA	NA	novel	NA
NW_019170544.1	11548721	C	CTCATCAAGTAATCAAAAA	ENSAMXT00000019180	ENSAMXG00000018629	NA	UTR_3	NONFRAMESHIFT INSERTION	NA	NA	NA	NA	NA	NA	NA	NA
NW_019170544.1	11548728	A	G	ENSAMXT00000019180	ENSAMXG00000018629	NA	UTR_3	NONCODING	NA	NA	NA	NA	NA	NA	novel	NA
NW_019170544.1	11548738	C	T	ENSAMXT00000019180	ENSAMXG00000018629	NA	UTR_3	NONCODING	NA	NA	NA	NA	NA	NA	novel	NA
NW_019170544.1	11548740	A	G	ENSAMXT00000019180	ENSAMXG00000018629	NA	UTR_3	NONCODING	NA	NA	NA	NA	NA	NA	novel	NA
NW_019170544.1	11548742	TACC	T	ENSAMXT00000019180	ENSAMXG00000018629	NA	UTR_3	NONFRAMESHIFT DELETION	NA	NA	NA	NA	NA	NA	NA	NA
NW_019170544.1	11548745	C	T	ENSAMXT00000019180	ENSAMXG00000018629	NA	UTR_3	NONCODING	NA	NA	NA	NA	NA	NA	novel	NA
NW_019170544.1	11548747	C	A	ENSAMXT00000019180	ENSAMXG00000018629	NA	UTR_3	NONCODING	NA	NA	NA	NA	NA	NA	novel	NA
NW_019170544.1	11548747	C	T	ENSAMXT00000019180	ENSAMXG00000018629	NA	UTR_3	NONCODING	NA	NA	NA	NA	NA	NA	novel	NA
NW_019170544.1	11548754	CTCTTAGGTGTT	TTCTTAGGTGTT	ENSAMXT00000019180	ENSAMXG00000018629	NA	UTR_3	SUBSTITUTION	NA	NA	NA	NA	NA	NA	NA	NA
NW_019170544.1	11548754	CTCTTAGGTGTT	C	ENSAMXT00000019180	ENSAMXG00000018629	NA	UTR_3	FRAMESHIFT DELETION	NA	NA	NA	NA	NA	NA	NA	NA
NW_019170544.1	11548759	AGGTG	A	ENSAMXT00000019180	ENSAMXG00000018629	NA	UTR_3	FRAMESHIFT DELETION	NA	NA	NA	NA	NA	NA	NA	NA
NW_019170544.1	11548766	T	TACTG	ENSAMXT00000019180	ENSAMXG00000018629	NA	UTR_3	FRAMESHIFT INSERTION	NA	NA	NA	NA	NA	NA	NA	NA
NW_019170544.1	11548769	C	G	ENSAMXT00000019180	ENSAMXG00000018629	NA	UTR_3	NONCODING	NA	NA	NA	NA	NA	NA	novel	NA
NW_019170544.1	11548797	TGG	AGG	ENSAMXT00000019180	ENSAMXG00000018629	NA	UTR_3	SUBSTITUTION	NA	NA	NA	NA	NA	NA	NA	NA
NW_019170544.1	11548797	TGG	T	ENSAMXT00000019180	ENSAMXG00000018629	NA	UTR_3	FRAMESHIFT DELETION	NA	NA	NA	NA	NA	NA	NA	NA
NW_019170544.1	11548801	CTCAT	C	ENSAMXT00000019180	ENSAMXG00000018629	NA	UTR_3	FRAMESHIFT DELETION	NA	NA	NA	NA	NA	NA	NA	NA
NW_019170544.1	11548812	A	AGTAGTCATAG	ENSAMXT00000019180	ENSAMXG00000018629	NA	UTR_3	FRAMESHIFT INSERTION	NA	NA	NA	NA	NA	NA	NA	NA
NW_019170544.1	11548815	T	TA	ENSAMXT00000019180	ENSAMXG00000018629	NA	UTR_3	FRAMESHIFT INSERTION	NA	NA	NA	NA	NA	NA	NA	NA
NW_019170544.1	11548818	T	A	ENSAMXT00000019180	ENSAMXG00000018629	NA	UTR_3	NONCODING	NA	NA	NA	NA	NA	NA	novel	NA
NW_019170544.1	11548818	T	G	ENSAMXT00000019180	ENSAMXG00000018629	NA	UTR_3	NONCODING	NA	NA	NA	NA	NA	NA	novel	NA
NW_019170544.1	11548819	GCT	G	ENSAMXT00000019180	ENSAMXG00000018629	NA	UTR_3	FRAMESHIFT DELETION	NA	NA	NA	NA	NA	NA	NA	NA
NW_019170544.1	11548823	ACTT	A	ENSAMXT00000019180	ENSAMXG00000018629	NA	UTR_3	NONFRAMESHIFT DELETION	NA	NA	NA	NA	NA	NA	NA	NA
NW_019170544.1	11548825	T	A	ENSAMXT00000019180	ENSAMXG00000018629	NA	UTR_3	NONCODING	NA	NA	NA	NA	NA	NA	novel	NA
NW_019170544.1	11548825	T	TTAGATGTGAGAGTGTCTAATACTTTTGATAGACTATTAGACACTCTCACATCTAAGTCAGCAC	ENSAMXT00000019180	ENSAMXG00000018629	NA	UTR_3	NONFRAMESHIFT INSERTION	NA	NA	NA	NA	NA	NA	NA	NA
NW_019170544.1	11548830	T	G	ENSAMXT00000019180	ENSAMXG00000018629	NA	UTR_3	NONCODING	NA	NA	NA	NA	NA	NA	novel	NA
NW_019170544.1	11548833	GAGAGTGTCTAATAGTCTATCAAAAGTA	G	ENSAMXT00000019180	ENSAMXG00000018629	NA	UTR_3	NONFRAMESHIFT DELETION	NA	NA	NA	NA	NA	NA	NA	NA
NW_019170544.1	11548836	A	C	ENSAMXT00000019180	ENSAMXG00000018629	NA	UTR_3	NONCODING	NA	NA	NA	NA	NA	NA	novel	NA
NW_019170544.1	11548864	TCAGAG	T	ENSAMXT00000019180	ENSAMXG00000018629	NA	UTR_3	FRAMESHIFT DELETION	NA	NA	NA	NA	NA	NA	NA	NA
NW_019170544.1	11548870	C	T	ENSAMXT00000019180	ENSAMXG00000018629	NA	UTR_3	NONCODING	NA	NA	NA	NA	NA	NA	novel	NA
NW_019170544.1	11548871	C	CAA	ENSAMXT00000019180	ENSAMXG00000018629	NA	UTR_3	FRAMESHIFT INSERTION	NA	NA	NA	NA	NA	NA	NA	NA
NW_019170544.1	11548882	C	T	ENSAMXT00000019180	ENSAMXG00000018629	NA	UTR_3	NONCODING	NA	NA	NA	NA	NA	NA	novel	NA
NW_019170544.1	11548886	T	TGAAGTCTTTTGA	ENSAMXT00000019180	ENSAMXG00000018629	NA	UTR_3	NONFRAMESHIFT INSERTION	NA	NA	NA	NA	NA	NA	NA	NA
NW_019170544.1	11548895	G	A	ENSAMXT00000019180	ENSAMXG00000018629	NA	UTR_3	NONCODING	NA	NA	NA	NA	NA	NA	novel	NA
NW_019170544.1	11548897	T	A	ENSAMXT00000019180	ENSAMXG00000018629	NA	UTR_3	NONCODING	NA	NA	NA	NA	NA	NA	novel	NA
NW_019170544.1	11548914	T	TTGTTTTC	ENSAMXT00000019180	ENSAMXG00000018629	NA	UTR_3	FRAMESHIFT INSERTION	NA	NA	NA	NA	NA	NA	NA	NA
NW_019170544.1	11548916	A	AATTTTTTATGCACCATGATCACGGGATATAT	ENSAMXT00000019180	ENSAMXG00000018629	NA	UTR_3	FRAMESHIFT INSERTION	NA	NA	NA	NA	NA	NA	NA	NA
NW_019170544.1	11548919	TC	T	ENSAMXT00000019180	ENSAMXG00000018629	NA	UTR_3	FRAMESHIFT DELETION	NA	NA	NA	NA	NA	NA	NA	NA
NW_019170544.1	11548920	C	A	ENSAMXT00000019180	ENSAMXG00000018629	NA	UTR_3	NONCODING	NA	NA	NA	NA	NA	NA	novel	NA
NW_019170544.1	11548921	T	A	ENSAMXT00000019180	ENSAMXG00000018629	NA	UTR_3	NONCODING	NA	NA	NA	NA	NA	NA	novel	NA
NW_019170544.1	11548922	TTGA	T	ENSAMXT00000019180	ENSAMXG00000018629	NA	UTR_3	NONFRAMESHIFT DELETION	NA	NA	NA	NA	NA	NA	NA	NA
NW_019170544.1	11548937	C	T	ENSAMXT00000019180	ENSAMXG00000018629	NA	UTR_3	NONCODING	NA	NA	NA	NA	NA	NA	novel	NA
NW_019170544.1	11548955	G	T	ENSAMXT00000019180	ENSAMXG00000018629	NA	UTR_3	NONCODING	NA	NA	NA	NA	NA	NA	novel	NA
NW_019170544.1	11548956	G	A	ENSAMXT00000019180	ENSAMXG00000018629	NA	UTR_3	NONCODING	NA	NA	NA	NA	NA	NA	novel	NA
NW_019170544.1	11548956	G	T	ENSAMXT00000019180	ENSAMXG00000018629	NA	UTR_3	NONCODING	NA	NA	NA	NA	NA	NA	novel	NA
NW_019170544.1	11548974	ACATC	A	ENSAMXT00000019180	ENSAMXG00000018629	NA	UTR_3	FRAMESHIFT DELETION	NA	NA	NA	NA	NA	NA	NA	NA
NW_019170544.1	11548976	A	AT	ENSAMXT00000019180	ENSAMXG00000018629	NA	UTR_3	FRAMESHIFT INSERTION	NA	NA	NA	NA	NA	NA	NA	NA
NW_019170544.1	11548978	C	CAG	ENSAMXT00000019180	ENSAMXG00000018629	NA	UTR_3	FRAMESHIFT INSERTION	NA	NA	NA	NA	NA	NA	NA	NA
NW_019170544.1	11548978	C	CCAG	ENSAMXT00000019180	ENSAMXG00000018629	NA	UTR_3	NONFRAMESHIFT INSERTION	NA	NA	NA	NA	NA	NA	NA	NA
NW_019170544.1	11548987	T	A	ENSAMXT00000019180	ENSAMXG00000018629	NA	UTR_3	NONCODING	NA	NA	NA	NA	NA	NA	novel	NA
NW_019170544.1	11548988	A	C	ENSAMXT00000019180	ENSAMXG00000018629	NA	UTR_3	NONCODING	NA	NA	NA	NA	NA	NA	novel	NA
NW_019170544.1	11548988	A	G	ENSAMXT00000019180	ENSAMXG00000018629	NA	UTR_3	NONCODING	NA	NA	NA	NA	NA	NA	novel	NA
NW_019170544.1	11548990	C	A	ENSAMXT00000019180	ENSAMXG00000018629	NA	UTR_3	NONCODING	NA	NA	NA	NA	NA	NA	novel	NA
NW_019170544.1	11548991	G	A	ENSAMXT00000019180	ENSAMXG00000018629	NA	UTR_3	NONCODING	NA	NA	NA	NA	NA	NA	novel	NA
NW_019170544.1	11548991	G	C	ENSAMXT00000019180	ENSAMXG00000018629	NA	UTR_3	NONCODING	NA	NA	NA	NA	NA	NA	novel	NA
NW_019170544.1	11548997	C	A	ENSAMXT00000019180	ENSAMXG00000018629	NA	UTR_3	NONCODING	NA	NA	NA	NA	NA	NA	novel	NA
NW_019170544.1	11549000	C	G	ENSAMXT00000019180	ENSAMXG00000018629	NA	UTR_3	NONCODING	NA	NA	NA	NA	NA	NA	novel	NA
NW_019170544.1	11549001	G	C	ENSAMXT00000019180	ENSAMXG00000018629	NA	UTR_3	NONCODING	NA	NA	NA	NA	NA	NA	novel	NA
NW_019170544.1	11549003	G	A	ENSAMXT00000019180	ENSAMXG00000018629	NA	UTR_3	NONCODING	NA	NA	NA	NA	NA	NA	novel	NA
NW_019170544.1	11549003	G	T	ENSAMXT00000019180	ENSAMXG00000018629	NA	UTR_3	NONCODING	NA	NA	NA	NA	NA	NA	novel	NA
NW_019170544.1	11549004	G	T	ENSAMXT00000019180	ENSAMXG00000018629	NA	UTR_3	NONCODING	NA	NA	NA	NA	NA	NA	novel	NA
NW_019170544.1	11549006	C	T	ENSAMXT00000019180	ENSAMXG00000018629	NA	UTR_3	NONCODING	NA	NA	NA	NA	NA	NA	novel	NA
NW_019170544.1	11549008	G	A	ENSAMXT00000019180	ENSAMXG00000018629	NA	UTR_3	NONCODING	NA	NA	NA	NA	NA	NA	novel	NA
NW_019170544.1	11549013	A	G	ENSAMXT00000019180	ENSAMXG00000018629	NA	UTR_3	NONCODING	NA	NA	NA	NA	NA	NA	novel	NA
NW_019170544.1	11549045	T	C	ENSAMXT00000019180	ENSAMXG00000018629	NA	UTR_3	NONCODING	NA	NA	NA	NA	NA	NA	novel	NA
NW_019170544.1	11549058	A	C	ENSAMXT00000019180	ENSAMXG00000018629	NA	UTR_3	NONCODING	NA	NA	NA	NA	NA	NA	novel	NA
NW_019170544.1	11549070	C	T	ENSAMXT00000019180	ENSAMXG00000018629	NA	UTR_3	NONCODING	NA	NA	NA	NA	NA	NA	novel	NA
NW_019170544.1	11549073	T	C	ENSAMXT00000019180	ENSAMXG00000018629	NA	UTR_3	NONCODING	NA	NA	NA	NA	NA	NA	novel	NA
NW_019170544.1	11549088	A	C	ENSAMXT00000019180	ENSAMXG00000018629	NA	UTR_3	NONCODING	NA	NA	NA	NA	NA	NA	novel	NA
NW_019170544.1	11549106	G	A	ENSAMXT00000019180	ENSAMXG00000018629	NA	UTR_3	NONCODING	NA	NA	NA	NA	NA	NA	novel	NA
NW_019170544.1	11549108	T	A	ENSAMXT00000019180	ENSAMXG00000018629	NA	UTR_3	NONCODING	NA	NA	NA	NA	NA	NA	novel	NA
NW_019170544.1	11549109	C	A	ENSAMXT00000019180	ENSAMXG00000018629	NA	UTR_3	NONCODING	NA	NA	NA	NA	NA	NA	novel	NA
NW_019170544.1	11549126	A	C	ENSAMXT00000019180	ENSAMXG00000018629	NA	UTR_3	NONCODING	NA	NA	NA	NA	NA	NA	novel	NA
NW_019170544.1	11549126	A	T	ENSAMXT00000019180	ENSAMXG00000018629	NA	UTR_3	NONCODING	NA	NA	NA	NA	NA	NA	novel	NA
NW_019170544.1	11549136	GTA	G	ENSAMXT00000019180	ENSAMXG00000018629	NA	UTR_3	FRAMESHIFT DELETION	NA	NA	NA	NA	NA	NA	NA	NA
NW_019170544.1	11549148	C	CG	ENSAMXT00000019180	ENSAMXG00000018629	NA	UTR_3	FRAMESHIFT INSERTION	NA	NA	NA	NA	NA	NA	NA	NA
NW_019170544.1	11549149	G	A	ENSAMXT00000019180	ENSAMXG00000018629	NA	UTR_3	NONCODING	NA	NA	NA	NA	NA	NA	novel	NA
NW_019170544.1	11549199	A	C	ENSAMXT00000019180	ENSAMXG00000018629	NA	UTR_3	NONCODING	NA	NA	NA	NA	NA	NA	novel	NA
NW_019170544.1	11549210	T	C	ENSAMXT00000019180	ENSAMXG00000018629	NA	UTR_3	NONCODING	NA	NA	NA	NA	NA	NA	novel	NA
NW_019170544.1	11549240	CCTAAAGGA	C	ENSAMXT00000019180	ENSAMXG00000018629	NA	UTR_3	FRAMESHIFT DELETION	NA	NA	NA	NA	NA	NA	NA	NA
NW_019170544.1	11549243	A	T	ENSAMXT00000019180	ENSAMXG00000018629	NA	UTR_3	NONCODING	NA	NA	NA	NA	NA	NA	novel	NA
NW_019170544.1	11549247	G	A	ENSAMXT00000019180	ENSAMXG00000018629	NA	UTR_3	NONCODING	NA	NA	NA	NA	NA	NA	novel	NA
NW_019170544.1	11549266	G	A	ENSAMXT00000019180	ENSAMXG00000018629	NA	UTR_3	NONCODING	NA	NA	NA	NA	NA	NA	novel	NA
NW_019170544.1	11549272	T	A	ENSAMXT00000019180	ENSAMXG00000018629	NA	UTR_3	NONCODING	NA	NA	NA	NA	NA	NA	novel	NA
NW_019170544.1	11549274	G	A	ENSAMXT00000019180	ENSAMXG00000018629	NA	UTR_3	NONCODING	NA	NA	NA	NA	NA	NA	novel	NA
NW_019170544.1	11549282	C	T	ENSAMXT00000019180	ENSAMXG00000018629	NA	UTR_3	NONCODING	NA	NA	NA	NA	NA	NA	novel	NA
NW_019170544.1	11549317	C	T	ENSAMXT00000019180	ENSAMXG00000018629	NA	UTR_3	NONCODING	NA	NA	NA	NA	NA	NA	novel	NA
NW_019170544.1	11549334	C	A	ENSAMXT00000019180	ENSAMXG00000018629	NA	UTR_3	NONCODING	NA	NA	NA	NA	NA	NA	novel	NA
NW_019170544.1	11549339	AATACATTGTCTGCCCAGCAC	A	ENSAMXT00000019180	ENSAMXG00000018629	NA	UTR_3	FRAMESHIFT DELETION	NA	NA	NA	NA	NA	NA	NA	NA
NW_019170544.1	11549339	AATACATTGTCTGCCCAGCAC	ATGTATTGTATGCTATTGTAAAATAAAAGTAGTATAGTATTTTTACAATAGCATACATTGTCTGCCCAGCAC	ENSAMXT00000019180	ENSAMXG00000018629	NA	UTR_3	SUBSTITUTION	NA	NA	NA	NA	NA	NA	NA	NA
NW_019170544.1	11549344	AT	A	ENSAMXT00000019180	ENSAMXG00000018629	NA	UTR_3	FRAMESHIFT DELETION	NA	NA	NA	NA	NA	NA	NA	NA
NW_019170544.1	11549344	AT	ATGTACT	ENSAMXT00000019180	ENSAMXG00000018629	NA	UTR_3	FRAMESHIFT INSERTION	NA	NA	NA	NA	NA	NA	NA	NA
NW_019170544.1	11549348	TCTGCCCAGC	T	ENSAMXT00000019180	ENSAMXG00000018629	NA	UTR_3	NONFRAMESHIFT DELETION	NA	NA	NA	NA	NA	NA	NA	NA
NW_019170544.1	11549349	C	A	ENSAMXT00000019180	ENSAMXG00000018629	NA	UTR_3	NONCODING	NA	NA	NA	NA	NA	NA	novel	NA
NW_019170544.1	11549359	CAA	C	ENSAMXT00000019180	ENSAMXG00000018629	NA	UTR_3	FRAMESHIFT DELETION	NA	NA	NA	NA	NA	NA	NA	NA
NW_019170544.1	11549364	T	G	ENSAMXT00000019180	ENSAMXG00000018629	NA	UTR_3	NONCODING	NA	NA	NA	NA	NA	NA	novel	NA
NW_019170544.1	11549366	GTTGTTGTGCAAA	G	ENSAMXT00000019180	ENSAMXG00000018629	NA	UTR_3	NONFRAMESHIFT DELETION	NA	NA	NA	NA	NA	NA	NA	NA
NW_019170544.1	11549372	G	T	ENSAMXT00000019180	ENSAMXG00000018629	NA	UTR_3	NONCODING	NA	NA	NA	NA	NA	NA	novel	NA
NW_019170544.1	11549385	G	A	ENSAMXT00000019180	ENSAMXG00000018629	NA	UTR_3	NONCODING	NA	NA	NA	NA	NA	NA	novel	NA
NW_019170544.1	11549388	C	T	ENSAMXT00000019180	ENSAMXG00000018629	NA	UTR_3	NONCODING	NA	NA	NA	NA	NA	NA	novel	NA
NW_019170544.1	11549397	GA	AA	ENSAMXT00000019180	ENSAMXG00000018629	NA	UTR_3	SUBSTITUTION	NA	NA	NA	NA	NA	NA	NA	NA
NW_019170544.1	11549397	GA	G	ENSAMXT00000019180	ENSAMXG00000018629	NA	UTR_3	FRAMESHIFT DELETION	NA	NA	NA	NA	NA	NA	NA	NA
NW_019170544.1	11549407	T	TA	ENSAMXT00000019180	ENSAMXG00000018629	NA	UTR_3	FRAMESHIFT INSERTION	NA	NA	NA	NA	NA	NA	NA	NA
NW_019170544.1	11549414	T	A	ENSAMXT00000019180	ENSAMXG00000018629	NA	UTR_3	NONCODING	NA	NA	NA	NA	NA	NA	novel	NA
NW_019170544.1	11549415	C	T	ENSAMXT00000019180	ENSAMXG00000018629	NA	UTR_3	NONCODING	NA	NA	NA	NA	NA	NA	novel	NA
NW_019170544.1	11549426	A	T	ENSAMXT00000019180	ENSAMXG00000018629	NA	UTR_3	NONCODING	NA	NA	NA	NA	NA	NA	novel	NA
NW_019170544.1	11549444	TG	T	ENSAMXT00000019180	ENSAMXG00000018629	NA	UTR_3	FRAMESHIFT DELETION	NA	NA	NA	NA	NA	NA	NA	NA
NW_019170544.1	11549446	CTA	C	ENSAMXT00000019180	ENSAMXG00000018629	NA	UTR_3	FRAMESHIFT DELETION	NA	NA	NA	NA	NA	NA	NA	NA
NW_019170544.1	11549455	A	G	ENSAMXT00000019180	ENSAMXG00000018629	NA	UTR_3	NONCODING	NA	NA	NA	NA	NA	NA	novel	NA
NW_019170544.1	11549473	T	C	ENSAMXT00000019180	ENSAMXG00000018629	NA	UTR_3	NONCODING	NA	NA	NA	NA	NA	NA	novel	NA
NW_019170544.1	11549479	C	G	ENSAMXT00000019180	ENSAMXG00000018629	NA	UTR_3	NONCODING	NA	NA	NA	NA	NA	NA	novel	NA
NW_019170544.1	11549490	T	C	ENSAMXT00000019180	ENSAMXG00000018629	NA	UTR_3	NONCODING	NA	NA	NA	NA	NA	NA	novel	NA
NW_019170544.1	11549519	C	T	ENSAMXT00000019180	ENSAMXG00000018629	NA	UTR_3	NONCODING	NA	NA	NA	NA	NA	NA	novel	NA
NW_019170544.1	11549528	A	T	ENSAMXT00000019180	ENSAMXG00000018629	NA	UTR_3	NONCODING	NA	NA	NA	NA	NA	NA	novel	NA
NW_019170544.1	11549570	A	T	ENSAMXT00000019180	ENSAMXG00000018629	NA	UTR_3	NONCODING	NA	NA	NA	NA	NA	NA	novel	NA
NW_019170544.1	11549581	C	A	ENSAMXT00000019180	ENSAMXG00000018629	NA	UTR_3	NONCODING	NA	NA	NA	NA	NA	NA	novel	NA
NW_019170544.1	11549586	C	T	ENSAMXT00000019180	ENSAMXG00000018629	NA	UTR_3	NONCODING	NA	NA	NA	NA	NA	NA	novel	NA
NW_019170544.1	11549593	G	C	ENSAMXT00000019180	ENSAMXG00000018629	NA	UTR_3	NONCODING	NA	NA	NA	NA	NA	NA	novel	NA
NW_019170544.1	11549599	A	G	ENSAMXT00000019180	ENSAMXG00000018629	NA	UTR_3	NONCODING	NA	NA	NA	NA	NA	NA	novel	NA
NW_019170544.1	11549623	CAA	C	ENSAMXT00000019180	ENSAMXG00000018629	NA	UTR_3	FRAMESHIFT DELETION	NA	NA	NA	NA	NA	NA	NA	NA
NW_019170544.1	11549628	A	ATG	ENSAMXT00000019180	ENSAMXG00000018629	NA	UTR_3	FRAMESHIFT INSERTION	NA	NA	NA	NA	NA	NA	NA	NA
NW_019170544.1	11549629	C	T	ENSAMXT00000019180	ENSAMXG00000018629	NA	UTR_3	NONCODING	NA	NA	NA	NA	NA	NA	novel	NA
NW_019170544.1	11549642	G	GCAACA	ENSAMXT00000019180	ENSAMXG00000018629	NA	UTR_3	FRAMESHIFT INSERTION	NA	NA	NA	NA	NA	NA	NA	NA
NW_019170544.1	11549645	G	A	ENSAMXT00000019180	ENSAMXG00000018629	NA	UTR_3	NONCODING	NA	NA	NA	NA	NA	NA	novel	NA
NW_019170544.1	11549650	TCA	T	ENSAMXT00000019180	ENSAMXG00000018629	NA	UTR_3	FRAMESHIFT DELETION	NA	NA	NA	NA	NA	NA	NA	NA
NW_019170544.1	11549653	A	G	ENSAMXT00000019180	ENSAMXG00000018629	NA	UTR_3	NONCODING	NA	NA	NA	NA	NA	NA	novel	NA
NW_019170544.1	11549654	A	AGG	ENSAMXT00000019180	ENSAMXG00000018629	NA	UTR_3	FRAMESHIFT INSERTION	NA	NA	NA	NA	NA	NA	NA	NA
NW_019170544.1	11549654	A	T	ENSAMXT00000019180	ENSAMXG00000018629	NA	UTR_3	NONCODING	NA	NA	NA	NA	NA	NA	novel	NA
NW_019170544.1	11549666	C	CGT	ENSAMXT00000019180	ENSAMXG00000018629	NA	UTR_3	FRAMESHIFT INSERTION	NA	NA	NA	NA	NA	NA	NA	NA
NW_019170544.1	11549667	TGC	T	ENSAMXT00000019180	ENSAMXG00000018629	NA	UTR_3	FRAMESHIFT DELETION	NA	NA	NA	NA	NA	NA	NA	NA
NW_019170544.1	11549679	A	C	ENSAMXT00000019180	ENSAMXG00000018629	NA	UTR_3	NONCODING	NA	NA	NA	NA	NA	NA	novel	NA
NW_019170544.1	11549709	T	C	ENSAMXT00000019180	ENSAMXG00000018629	NA	UTR_3	NONCODING	NA	NA	NA	NA	NA	NA	novel	NA
NW_019170544.1	11549715	T	C	ENSAMXT00000019180	ENSAMXG00000018629	NA	UTR_3	NONCODING	NA	NA	NA	NA	NA	NA	novel	NA
NW_019170544.1	11549722	C	A	ENSAMXT00000019180	ENSAMXG00000018629	NA	UTR_3	NONCODING	NA	NA	NA	NA	NA	NA	novel	NA
NW_019170544.1	11549727	G	T	ENSAMXT00000019180	ENSAMXG00000018629	NA	UTR_3	NONCODING	NA	NA	NA	NA	NA	NA	novel	NA
NW_019170544.1	11549730	C	A	ENSAMXT00000019180	ENSAMXG00000018629	NA	UTR_3	NONCODING	NA	NA	NA	NA	NA	NA	novel	NA
NW_019170544.1	11549733	G	T	ENSAMXT00000019180	ENSAMXG00000018629	NA	UTR_3	NONCODING	NA	NA	NA	NA	NA	NA	novel	NA
NW_019170544.1	11549735	C	A	ENSAMXT00000019180	ENSAMXG00000018629	NA	UTR_3	NONCODING	NA	NA	NA	NA	NA	NA	novel	NA
NW_019170544.1	11549737	C	T	ENSAMXT00000019180	ENSAMXG00000018629	NA	UTR_3	NONCODING	NA	NA	NA	NA	NA	NA	novel	NA
NW_019170544.1	11549752	A	G	ENSAMXT00000019180	ENSAMXG00000018629	NA	UTR_3	NONCODING	NA	NA	NA	NA	NA	NA	novel	NA
NW_019170544.1	11549760	G	C	ENSAMXT00000019180	ENSAMXG00000018629	NA	UTR_3	NONCODING	NA	NA	NA	NA	NA	NA	novel	NA
NW_019170544.1	11549767	T	A	ENSAMXT00000019180	ENSAMXG00000018629	NA	UTR_3	NONCODING	NA	NA	NA	NA	NA	NA	novel	NA
NW_019170544.1	11549768	A	C	ENSAMXT00000019180	ENSAMXG00000018629	NA	UTR_3	NONCODING	NA	NA	NA	NA	NA	NA	novel	NA
NW_019170544.1	11549768	A	T	ENSAMXT00000019180	ENSAMXG00000018629	NA	UTR_3	NONCODING	NA	NA	NA	NA	NA	NA	novel	NA
NW_019170544.1	11549805	G	A	ENSAMXT00000019180	ENSAMXG00000018629	NA	UTR_3	NONCODING	NA	NA	NA	NA	NA	NA	novel	NA
NW_019170544.1	11549807	T	A	ENSAMXT00000019180	ENSAMXG00000018629	NA	UTR_3	NONCODING	NA	NA	NA	NA	NA	NA	novel	NA
NW_019170544.1	11549809	T	C	ENSAMXT00000019180	ENSAMXG00000018629	NA	UTR_3	NONCODING	NA	NA	NA	NA	NA	NA	novel	NA
NW_019170544.1	11549810	T	G	ENSAMXT00000019180	ENSAMXG00000018629	NA	UTR_3	NONCODING	NA	NA	NA	NA	NA	NA	novel	NA
NW_019170544.1	11549821	T	C	ENSAMXT00000019180	ENSAMXG00000018629	NA	UTR_3	NONCODING	NA	NA	NA	NA	NA	NA	novel	NA
NW_019170544.1	11549831	C	T	ENSAMXT00000019180	ENSAMXG00000018629	NA	UTR_3	NONCODING	NA	NA	NA	NA	NA	NA	novel	NA
NW_019170544.1	11549841	TAC	T	ENSAMXT00000019180	ENSAMXG00000018629	NA	UTR_3	FRAMESHIFT DELETION	NA	NA	NA	NA	NA	NA	NA	NA
NW_019170544.1	11549856	TTATA	T	ENSAMXT00000019180	ENSAMXG00000018629	NA	UTR_3	FRAMESHIFT DELETION	NA	NA	NA	NA	NA	NA	NA	NA
NW_019170544.1	11549868	A	T	ENSAMXT00000019180	ENSAMXG00000018629	NA	UTR_3	NONCODING	NA	NA	NA	NA	NA	NA	novel	NA
NW_019170544.1	11549871	C	T	ENSAMXT00000019180	ENSAMXG00000018629	NA	UTR_3	NONCODING	NA	NA	NA	NA	NA	NA	novel	NA
NW_019170544.1	11549881	ATACATT	A	ENSAMXT00000019180	ENSAMXG00000018629	NA	UTR_3	NONFRAMESHIFT DELETION	NA	NA	NA	NA	NA	NA	NA	NA
NW_019170544.1	11549904	A	T	ENSAMXT00000019180	ENSAMXG00000018629	NA	UTR_3	NONCODING	NA	NA	NA	NA	NA	NA	novel	NA
NW_019170544.1	11549919	C	A	ENSAMXT00000019180	ENSAMXG00000018629	NA	UTR_3	NONCODING	NA	NA	NA	NA	NA	NA	novel	NA
NW_019170544.1	11549925	C	T	ENSAMXT00000019180	ENSAMXG00000018629	NA	UTR_3	NONCODING	NA	NA	NA	NA	NA	NA	novel	NA
NW_019170544.1	11549943	C	G	ENSAMXT00000019180	ENSAMXG00000018629	NA	UTR_3	NONCODING	NA	NA	NA	NA	NA	NA	novel	NA
NW_019170544.1	11549966	G	A	ENSAMXT00000019180	ENSAMXG00000018629	NA	UTR_3	NONCODING	NA	NA	NA	NA	NA	NA	novel	NA
NW_019170544.1	11549967	C	T	ENSAMXT00000019180	ENSAMXG00000018629	NA	UTR_3	NONCODING	NA	NA	NA	NA	NA	NA	novel	NA
NW_019170544.1	11549970	G	C	ENSAMXT00000019180	ENSAMXG00000018629	NA	UTR_3	NONCODING	NA	NA	NA	NA	NA	NA	novel	NA
NW_019170544.1	11549982	G	A	ENSAMXT00000019180	ENSAMXG00000018629	NA	UTR_3	NONCODING	NA	NA	NA	NA	NA	NA	novel	NA
NW_019170544.1	11550017	A	AAG	ENSAMXT00000019180	ENSAMXG00000018629	NA	UTR_3	FRAMESHIFT INSERTION	NA	NA	NA	NA	NA	NA	NA	NA
NW_019170544.1	11550021	C	A	ENSAMXT00000019180	ENSAMXG00000018629	NA	UTR_3	NONCODING	NA	NA	NA	NA	NA	NA	novel	NA
NW_019170544.1	11550028	CTTTTT	CT	ENSAMXT00000019180	ENSAMXG00000018629	NA	UTR_3	FRAMESHIFT DELETION	NA	NA	NA	NA	NA	NA	NA	NA
NW_019170544.1	11550028	CTTTTT	CTT	ENSAMXT00000019180	ENSAMXG00000018629	NA	UTR_3	SUBSTITUTION	NA	NA	NA	NA	NA	NA	NA	NA
NW_019170544.1	11550028	CTTTTT	C	ENSAMXT00000019180	ENSAMXG00000018629	NA	UTR_3	FRAMESHIFT DELETION	NA	NA	NA	NA	NA	NA	NA	NA
NW_019170544.1	11550028	CTTTTT	CTTTT	ENSAMXT00000019180	ENSAMXG00000018629	NA	UTR_3	FRAMESHIFT DELETION	NA	NA	NA	NA	NA	NA	NA	NA
NW_019170544.1	11550028	CTTTTT	CTTTTTTTTTT	ENSAMXT00000019180	ENSAMXG00000018629	NA	UTR_3	FRAMESHIFT INSERTION	NA	NA	NA	NA	NA	NA	NA	NA
NW_019170544.1	11550028	CTTTTT	CTTTTTTTTT	ENSAMXT00000019180	ENSAMXG00000018629	NA	UTR_3	FRAMESHIFT INSERTION	NA	NA	NA	NA	NA	NA	NA	NA
NW_019170544.1	11550028	CTTTTT	CTTTTTTT	ENSAMXT00000019180	ENSAMXG00000018629	NA	UTR_3	FRAMESHIFT INSERTION	NA	NA	NA	NA	NA	NA	NA	NA
NW_019170544.1	11550028	CTTTTT	CTTTTTT	ENSAMXT00000019180	ENSAMXG00000018629	NA	UTR_3	FRAMESHIFT INSERTION	NA	NA	NA	NA	NA	NA	NA	NA
NW_019170544.1	11550028	CTTTTT	CTTT	ENSAMXT00000019180	ENSAMXG00000018629	NA	UTR_3	FRAMESHIFT DELETION	NA	NA	NA	NA	NA	NA	NA	NA
NW_019170544.1	11550036	T	TACCA	ENSAMXT00000019180	ENSAMXG00000018629	NA	UTR_3	FRAMESHIFT INSERTION	NA	NA	NA	NA	NA	NA	NA	NA
NW_019170544.1	11550037	T	TATTGTGTG	ENSAMXT00000019180	ENSAMXG00000018629	NA	UTR_3	FRAMESHIFT INSERTION	NA	NA	NA	NA	NA	NA	NA	NA
NW_019170544.1	11550037	T	TTTACAATATTGTGTG	ENSAMXT00000019180	ENSAMXG00000018629	NA	UTR_3	NONFRAMESHIFT INSERTION	NA	NA	NA	NA	NA	NA	NA	NA
NW_019170544.1	11550037	T	TTTTACAATATTGTGTG	ENSAMXT00000019180	ENSAMXG00000018629	NA	UTR_3	FRAMESHIFT INSERTION	NA	NA	NA	NA	NA	NA	NA	NA
NW_019170544.1	11550046	CATAT	C	ENSAMXT00000019180	ENSAMXG00000018629	NA	UTR_3	FRAMESHIFT DELETION	NA	NA	NA	NA	NA	NA	NA	NA
NW_019170544.1	11550046	CATAT	AATAT	ENSAMXT00000019180	ENSAMXG00000018629	NA	UTR_3	SUBSTITUTION	NA	NA	NA	NA	NA	NA	NA	NA
NW_019170544.1	11550050	T	TTGTGTGTTGGTAAAA	ENSAMXT00000019180	ENSAMXG00000018629	NA	UTR_3	NONFRAMESHIFT INSERTION	NA	NA	NA	NA	NA	NA	NA	NA
NW_019170544.1	11550050	T	TTGTGTGTTTTTTACC	ENSAMXT00000019180	ENSAMXG00000018629	NA	UTR_3	NONFRAMESHIFT INSERTION	NA	NA	NA	NA	NA	NA	NA	NA
NW_019170544.1	11550057	C	T	ENSAMXT00000019180	ENSAMXG00000018629	NA	UTR_3	NONCODING	NA	NA	NA	NA	NA	NA	novel	NA
NW_019170544.1	11550062	T	TG	ENSAMXT00000019180	ENSAMXG00000018629	NA	UTR_3	FRAMESHIFT INSERTION	NA	NA	NA	NA	NA	NA	NA	NA
NW_019170544.1	11550063	T	G	ENSAMXT00000019180	ENSAMXG00000018629	NA	UTR_3	NONCODING	NA	NA	NA	NA	NA	NA	novel	NA
NW_019170544.1	11550128	C	A	ENSAMXT00000019180	ENSAMXG00000018629	NA	UTR_3	NONCODING	NA	NA	NA	NA	NA	NA	novel	NA
NW_019170544.1	11550129	A	C	ENSAMXT00000019180	ENSAMXG00000018629	NA	UTR_3	NONCODING	NA	NA	NA	NA	NA	NA	novel	NA
NW_019170544.1	11550167	G	A	ENSAMXT00000019180	ENSAMXG00000018629	NA	UTR_3	NONCODING	NA	NA	NA	NA	NA	NA	novel	NA
NW_019170544.1	11550172	T	C	ENSAMXT00000019180	ENSAMXG00000018629	NA	UTR_3	NONCODING	NA	NA	NA	NA	NA	NA	novel	NA
NW_019170544.1	11550179	T	C	ENSAMXT00000019180	ENSAMXG00000018629	NA	UTR_3	NONCODING	NA	NA	NA	NA	NA	NA	novel	NA
NW_019170544.1	11550179	T	TC	ENSAMXT00000019180	ENSAMXG00000018629	NA	UTR_3	FRAMESHIFT INSERTION	NA	NA	NA	NA	NA	NA	NA	NA
NW_019170544.1	11550197	ACT	A	ENSAMXT00000019180	ENSAMXG00000018629	NA	UTR_3	FRAMESHIFT DELETION	NA	NA	NA	NA	NA	NA	NA	NA
NW_019170544.1	11550201	T	A	ENSAMXT00000019180	ENSAMXG00000018629	NA	UTR_3	NONCODING	NA	NA	NA	NA	NA	NA	novel	NA
NW_019170544.1	11550210	C	T	ENSAMXT00000019180	ENSAMXG00000018629	NA	UTR_3	NONCODING	NA	NA	NA	NA	NA	NA	novel	NA
NW_019170544.1	11550224	G	A	ENSAMXT00000019180	ENSAMXG00000018629	NA	UTR_3	NONCODING	NA	NA	NA	NA	NA	NA	novel	NA
NW_019170544.1	11550254	T	C	ENSAMXT00000019180	ENSAMXG00000018629	NA	UTR_3	NONCODING	NA	NA	NA	NA	NA	NA	novel	NA
NW_019170544.1	11550259	T	A	ENSAMXT00000019180	ENSAMXG00000018629	NA	UTR_3	NONCODING	NA	NA	NA	NA	NA	NA	novel	NA
NW_019170544.1	11550260	C	A	ENSAMXT00000019180	ENSAMXG00000018629	NA	UTR_3	NONCODING	NA	NA	NA	NA	NA	NA	novel	NA
NW_019170544.1	11550260	C	T	ENSAMXT00000019180	ENSAMXG00000018629	NA	UTR_3	NONCODING	NA	NA	NA	NA	NA	NA	novel	NA
NW_019170544.1	11550269	G	A	ENSAMXT00000019180	ENSAMXG00000018629	NA	UTR_3	NONCODING	NA	NA	NA	NA	NA	NA	novel	NA
NW_019170544.1	11550286	G	C	ENSAMXT00000019180	ENSAMXG00000018629	NA	UTR_3	NONCODING	NA	NA	NA	NA	NA	NA	novel	NA
NW_019170544.1	11550296	G	A	ENSAMXT00000019180	ENSAMXG00000018629	NA	UTR_3	NONCODING	NA	NA	NA	NA	NA	NA	novel	NA
NW_019170544.1	11550298	A	G	ENSAMXT00000019180	ENSAMXG00000018629	NA	UTR_3	NONCODING	NA	NA	NA	NA	NA	NA	novel	NA
NW_019170544.1	11550312	A	C	ENSAMXT00000019180	ENSAMXG00000018629	NA	UTR_3	NONCODING	NA	NA	NA	NA	NA	NA	novel	NA
NW_019170544.1	11550336	T	G	ENSAMXT00000019180	ENSAMXG00000018629	NA	UTR_3	NONCODING	NA	NA	NA	NA	NA	NA	novel	NA
NW_019170544.1	11550343	T	C	ENSAMXT00000019180	ENSAMXG00000018629	NA	UTR_3	NONCODING	NA	NA	NA	NA	NA	NA	novel	NA
NW_019170544.1	11550362	A	G	ENSAMXT00000019180	ENSAMXG00000018629	NA	UTR_3	NONCODING	NA	NA	NA	NA	NA	NA	novel	NA
NW_019170544.1	11550363	G	A	ENSAMXT00000019180	ENSAMXG00000018629	NA	UTR_3	NONCODING	NA	NA	NA	NA	NA	NA	novel	NA
NW_019170544.1	11550369	C	T	ENSAMXT00000019180	ENSAMXG00000018629	NA	UTR_3	NONCODING	NA	NA	NA	NA	NA	NA	novel	NA
NW_019170544.1	11550374	A	T	ENSAMXT00000019180	ENSAMXG00000018629	NA	UTR_3	NONCODING	NA	NA	NA	NA	NA	NA	novel	NA
NW_019170544.1	11550400	G	A	ENSAMXT00000019180	ENSAMXG00000018629	NA	UTR_3	NONCODING	NA	NA	NA	NA	NA	NA	novel	NA
NW_019170544.1	11550414	T	C	ENSAMXT00000019180	ENSAMXG00000018629	NA	UTR_3	NONCODING	NA	NA	NA	NA	NA	NA	novel	NA
NW_019170544.1	11550429	G	A	ENSAMXT00000019180	ENSAMXG00000018629	NA	UTR_3	NONCODING	NA	NA	NA	NA	NA	NA	novel	NA
NW_019170544.1	11550429	G	T	ENSAMXT00000019180	ENSAMXG00000018629	NA	UTR_3	NONCODING	NA	NA	NA	NA	NA	NA	novel	NA
NW_019170544.1	11550430	G	A	ENSAMXT00000019180	ENSAMXG00000018629	NA	UTR_3	NONCODING	NA	NA	NA	NA	NA	NA	novel	NA
NW_019170544.1	11550433	A	C	ENSAMXT00000019180	ENSAMXG00000018629	NA	UTR_3	NONCODING	NA	NA	NA	NA	NA	NA	novel	NA
NW_019170544.1	11550442	G	C	ENSAMXT00000019180	ENSAMXG00000018629	NA	UTR_3	NONCODING	NA	NA	NA	NA	NA	NA	novel	NA
NW_019170544.1	11550459	CA	C	ENSAMXT00000019180	ENSAMXG00000018629	NA	UTR_3	FRAMESHIFT DELETION	NA	NA	NA	NA	NA	NA	NA	NA
NW_019170544.1	11550465	CAA	C	ENSAMXT00000019180	ENSAMXG00000018629	NA	UTR_3	FRAMESHIFT DELETION	NA	NA	NA	NA	NA	NA	NA	NA
NW_019170544.1	11550469	A	T	ENSAMXT00000019180	ENSAMXG00000018629	NA	UTR_3	NONCODING	NA	NA	NA	NA	NA	NA	novel	NA
NW_019170544.1	11550475	T	G	ENSAMXT00000019180	ENSAMXG00000018629	NA	UTR_3	NONCODING	NA	NA	NA	NA	NA	NA	novel	NA
NW_019170544.1	11550490	T	C	ENSAMXT00000019180	ENSAMXG00000018629	NA	UTR_3	NONCODING	NA	NA	NA	NA	NA	NA	novel	NA
NW_019170544.1	11550499	T	C	ENSAMXT00000019180	ENSAMXG00000018629	NA	UTR_3	NONCODING	NA	NA	NA	NA	NA	NA	novel	NA
NW_019170544.1	11550515	G	A	ENSAMXT00000019180	ENSAMXG00000018629	NA	UTR_3	NONCODING	NA	NA	NA	NA	NA	NA	novel	NA
NW_019170544.1	11550519	G	A	ENSAMXT00000019180	ENSAMXG00000018629	NA	UTR_3	NONCODING	NA	NA	NA	NA	NA	NA	novel	NA
NW_019170544.1	11550519	G	C	ENSAMXT00000019180	ENSAMXG00000018629	NA	UTR_3	NONCODING	NA	NA	NA	NA	NA	NA	novel	NA
NW_019170544.1	11550523	A	C	ENSAMXT00000019180	ENSAMXG00000018629	NA	UTR_3	NONCODING	NA	NA	NA	NA	NA	NA	novel	NA
NW_019170544.1	11550540	AGCAGTCATACTC	A	ENSAMXT00000019180	ENSAMXG00000018629	NA	UTR_3	NONFRAMESHIFT DELETION	NA	NA	NA	NA	NA	NA	NA	NA
NW_019170544.1	11550551	T	A	ENSAMXT00000019180	ENSAMXG00000018629	NA	UTR_3	NONCODING	NA	NA	NA	NA	NA	NA	novel	NA
NW_019170544.1	11550553	G	A	ENSAMXT00000019180	ENSAMXG00000018629	NA	UTR_3	NONCODING	NA	NA	NA	NA	NA	NA	novel	NA
NW_019170544.1	11550556	C	A	ENSAMXT00000019180	ENSAMXG00000018629	NA	UTR_3	NONCODING	NA	NA	NA	NA	NA	NA	novel	NA
NW_019170544.1	11550573	T	G	ENSAMXT00000019180	ENSAMXG00000018629	NA	UTR_3	NONCODING	NA	NA	NA	NA	NA	NA	novel	NA
NW_019170544.1	11550599	A	ATACCGG	ENSAMXT00000019180	ENSAMXG00000018629	NA	UTR_3	NONFRAMESHIFT INSERTION	NA	NA	NA	NA	NA	NA	NA	NA
NW_019170544.1	11550600	T	C	ENSAMXT00000019180	ENSAMXG00000018629	NA	UTR_3	NONCODING	NA	NA	NA	NA	NA	NA	novel	NA
NW_019170544.1	11550604	A	C	ENSAMXT00000019180	ENSAMXG00000018629	NA	UTR_3	NONCODING	NA	NA	NA	NA	NA	NA	novel	NA
NW_019170544.1	11550606	A	T	ENSAMXT00000019180	ENSAMXG00000018629	NA	UTR_3	NONCODING	NA	NA	NA	NA	NA	NA	novel	NA
NW_019170544.1	11550612	G	T	ENSAMXT00000019180	ENSAMXG00000018629	NA	UTR_3	NONCODING	NA	NA	NA	NA	NA	NA	novel	NA
NW_019170544.1	11550615	CA	C	ENSAMXT00000019180	ENSAMXG00000018629	NA	UTR_3	FRAMESHIFT DELETION	NA	NA	NA	NA	NA	NA	NA	NA
NW_019170544.1	11550621	A	G	ENSAMXT00000019180	ENSAMXG00000018629	NA	UTR_3	NONCODING	NA	NA	NA	NA	NA	NA	novel	NA
NW_019170544.1	11550631	G	A	ENSAMXT00000019180	ENSAMXG00000018629	NA	UTR_3	NONCODING	NA	NA	NA	NA	NA	NA	novel	NA
NW_019170544.1	11550637	T	A	ENSAMXT00000019180	ENSAMXG00000018629	NA	UTR_3	NONCODING	NA	NA	NA	NA	NA	NA	novel	NA
NW_019170544.1	11550645	T	A	ENSAMXT00000019180	ENSAMXG00000018629	NA	UTR_3	NONCODING	NA	NA	NA	NA	NA	NA	novel	NA
NW_019170544.1	11550649	C	T	ENSAMXT00000019180	ENSAMXG00000018629	NA	UTR_3	NONCODING	NA	NA	NA	NA	NA	NA	novel	NA
NW_019170544.1	11550654	C	T	ENSAMXT00000019180	ENSAMXG00000018629	NA	UTR_3	NONCODING	NA	NA	NA	NA	NA	NA	novel	NA
NW_019170544.1	11550656	G	C	ENSAMXT00000019180	ENSAMXG00000018629	NA	UTR_3	NONCODING	NA	NA	NA	NA	NA	NA	novel	NA
NW_019170544.1	11550670	A	G	ENSAMXT00000019180	ENSAMXG00000018629	NA	UTR_3	NONCODING	NA	NA	NA	NA	NA	NA	novel	NA
NW_019170544.1	11550681	A	T	ENSAMXT00000019180	ENSAMXG00000018629	NA	UTR_3	NONCODING	NA	NA	NA	NA	NA	NA	novel	NA
NW_019170544.1	11550684	T	C	ENSAMXT00000019180	ENSAMXG00000018629	NA	UTR_3	NONCODING	NA	NA	NA	NA	NA	NA	novel	NA
NW_019170544.1	11550696	G	A	ENSAMXT00000019180	ENSAMXG00000018629	NA	UTR_3	NONCODING	NA	NA	NA	NA	NA	NA	novel	NA
NW_019170544.1	11550704	A	G	ENSAMXT00000019180	ENSAMXG00000018629	NA	UTR_3	NONCODING	NA	NA	NA	NA	NA	NA	novel	NA
NW_019170544.1	11550707	C	CT	ENSAMXT00000019180	ENSAMXG00000018629	NA	UTR_3	FRAMESHIFT INSERTION	NA	NA	NA	NA	NA	NA	NA	NA
NW_019170544.1	11550709	C	CT	ENSAMXT00000019180	ENSAMXG00000018629	NA	UTR_3	FRAMESHIFT INSERTION	NA	NA	NA	NA	NA	NA	NA	NA
NW_019170544.1	11550711	A	AT	ENSAMXT00000019180	ENSAMXG00000018629	NA	UTR_3	FRAMESHIFT INSERTION	NA	NA	NA	NA	NA	NA	NA	NA
NW_019170544.1	11550719	T	C	ENSAMXT00000019180	ENSAMXG00000018629	NA	UTR_3	NONCODING	NA	NA	NA	NA	NA	NA	novel	NA
NW_019170544.1	11550721	A	T	ENSAMXT00000019180	ENSAMXG00000018629	NA	UTR_3	NONCODING	NA	NA	NA	NA	NA	NA	novel	NA
NW_019170544.1	11550722	G	A	ENSAMXT00000019180	ENSAMXG00000018629	NA	UTR_3	NONCODING	NA	NA	NA	NA	NA	NA	novel	NA
NW_019170544.1	11550724	T	A	ENSAMXT00000019180	ENSAMXG00000018629	NA	UTR_3	NONCODING	NA	NA	NA	NA	NA	NA	novel	NA
NW_019170544.1	11550729	A	T	ENSAMXT00000019180	ENSAMXG00000018629	NA	UTR_3	NONCODING	NA	NA	NA	NA	NA	NA	novel	NA
NW_019170544.1	11550733	T	A	ENSAMXT00000019180	ENSAMXG00000018629	NA	UTR_3	NONCODING	NA	NA	NA	NA	NA	NA	novel	NA
NW_019170544.1	11550737	T	C	ENSAMXT00000019180	ENSAMXG00000018629	NA	UTR_3	NONCODING	NA	NA	NA	NA	NA	NA	novel	NA
NW_019170544.1	11550738	A	G	ENSAMXT00000019180	ENSAMXG00000018629	NA	UTR_3	NONCODING	NA	NA	NA	NA	NA	NA	novel	NA
NW_019170544.1	11550743	G	A	ENSAMXT00000019180	ENSAMXG00000018629	NA	UTR_3	NONCODING	NA	NA	NA	NA	NA	NA	novel	NA
NW_019170544.1	11550747	G	T	ENSAMXT00000019180	ENSAMXG00000018629	NA	UTR_3	NONCODING	NA	NA	NA	NA	NA	NA	novel	NA
NW_019170544.1	11550754	T	TG	ENSAMXT00000019180	ENSAMXG00000018629	NA	UTR_3	FRAMESHIFT INSERTION	NA	NA	NA	NA	NA	NA	NA	NA
NW_019170544.1	11550756	AATT	A	ENSAMXT00000019180	ENSAMXG00000018629	NA	UTR_3	NONFRAMESHIFT DELETION	NA	NA	NA	NA	NA	NA	NA	NA
NW_019170544.1	11550756	AATT	GATT	ENSAMXT00000019180	ENSAMXG00000018629	NA	UTR_3	SUBSTITUTION	NA	NA	NA	NA	NA	NA	NA	NA
NW_019170544.1	11550762	TTG	T	ENSAMXT00000019180	ENSAMXG00000018629	NA	UTR_3	FRAMESHIFT DELETION	NA	NA	NA	NA	NA	NA	NA	NA
NW_019170544.1	11550764	G	C	ENSAMXT00000019180	ENSAMXG00000018629	NA	UTR_3	NONCODING	NA	NA	NA	NA	NA	NA	novel	NA
NW_019170544.1	11550764	G	T	ENSAMXT00000019180	ENSAMXG00000018629	NA	UTR_3	NONCODING	NA	NA	NA	NA	NA	NA	novel	NA
NW_019170544.1	11550775	T	C	ENSAMXT00000019180	ENSAMXG00000018629	NA	UTR_3	NONCODING	NA	NA	NA	NA	NA	NA	novel	NA
NW_019170544.1	11550779	C	A	ENSAMXT00000019180	ENSAMXG00000018629	NA	UTR_3	NONCODING	NA	NA	NA	NA	NA	NA	novel	NA
NW_019170544.1	11550779	C	T	ENSAMXT00000019180	ENSAMXG00000018629	NA	UTR_3	NONCODING	NA	NA	NA	NA	NA	NA	novel	NA
NW_019170544.1	11550794	G	C	ENSAMXT00000019180	ENSAMXG00000018629	NA	UTR_3	NONCODING	NA	NA	NA	NA	NA	NA	novel	NA
NW_019170544.1	11550794	G	T	ENSAMXT00000019180	ENSAMXG00000018629	NA	UTR_3	NONCODING	NA	NA	NA	NA	NA	NA	novel	NA
NW_019170544.1	11550801	T	C	ENSAMXT00000019180	ENSAMXG00000018629	NA	UTR_3	NONCODING	NA	NA	NA	NA	NA	NA	novel	NA
NW_019170544.1	11550802	C	A	ENSAMXT00000019180	ENSAMXG00000018629	NA	UTR_3	NONCODING	NA	NA	NA	NA	NA	NA	novel	NA
NW_019170544.1	11550811	G	T	ENSAMXT00000019180	ENSAMXG00000018629	NA	UTR_3	NONCODING	NA	NA	NA	NA	NA	NA	novel	NA
NW_019170544.1	11550819	T	G	ENSAMXT00000019180	ENSAMXG00000018629	NA	UTR_3	NONCODING	NA	NA	NA	NA	NA	NA	novel	NA
NW_019170544.1	11550820	C	A	ENSAMXT00000019180	ENSAMXG00000018629	NA	UTR_3	NONCODING	NA	NA	NA	NA	NA	NA	novel	NA
NW_019170544.1	11550825	T	A	ENSAMXT00000019180	ENSAMXG00000018629	NA	UTR_3	NONCODING	NA	NA	NA	NA	NA	NA	novel	NA
NW_019170544.1	11550826	A	T	ENSAMXT00000019180	ENSAMXG00000018629	NA	UTR_3	NONCODING	NA	NA	NA	NA	NA	NA	novel	NA
NW_019170544.1	11550844	T	C	ENSAMXT00000019180	ENSAMXG00000018629	NA	UTR_3	NONCODING	NA	NA	NA	NA	NA	NA	novel	NA
NW_019170544.1	11550846	C	T	ENSAMXT00000019180	ENSAMXG00000018629	NA	UTR_3	NONCODING	NA	NA	NA	NA	NA	NA	novel	NA
NW_019170544.1	11550850	G	T	ENSAMXT00000019180	ENSAMXG00000018629	NA	UTR_3	NONCODING	NA	NA	NA	NA	NA	NA	novel	NA
NW_019170544.1	11550860	A	T	ENSAMXT00000019180	ENSAMXG00000018629	NA	UTR_3	NONCODING	NA	NA	NA	NA	NA	NA	novel	NA
NW_019170544.1	11550870	T	A	ENSAMXT00000019180	ENSAMXG00000018629	NA	UTR_3	NONCODING	NA	NA	NA	NA	NA	NA	novel	NA
NW_019170544.1	11550870	T	C	ENSAMXT00000019180	ENSAMXG00000018629	NA	UTR_3	NONCODING	NA	NA	NA	NA	NA	NA	novel	NA
NW_019170544.1	11550871	AT	A	ENSAMXT00000019180	ENSAMXG00000018629	NA	UTR_3	FRAMESHIFT DELETION	NA	NA	NA	NA	NA	NA	NA	NA
NW_019170544.1	11550873	T	A	ENSAMXT00000019180	ENSAMXG00000018629	NA	UTR_3	NONCODING	NA	NA	NA	NA	NA	NA	novel	NA
NW_019170544.1	11550873	T	G	ENSAMXT00000019180	ENSAMXG00000018629	NA	UTR_3	NONCODING	NA	NA	NA	NA	NA	NA	novel	NA
NW_019170544.1	11550879	AATTTTAC	A	ENSAMXT00000019180	ENSAMXG00000018629	NA	UTR_3	FRAMESHIFT DELETION	NA	NA	NA	NA	NA	NA	NA	NA
NW_019170544.1	11550889	C	A	ENSAMXT00000019180	ENSAMXG00000018629	NA	UTR_3	NONCODING	NA	NA	NA	NA	NA	NA	novel	NA
NW_019170544.1	11550889	C	CAAGTATTTGATTATGTAAAATTCTGTAAATATGTATATACAGAATTTTACATA	ENSAMXT00000019180	ENSAMXG00000018629	NA	UTR_3	FRAMESHIFT INSERTION	NA	NA	NA	NA	NA	NA	NA	NA
NW_019170544.1	11550912	TTAA	T	ENSAMXT00000019180	ENSAMXG00000018629	NA	UTR_3	NONFRAMESHIFT DELETION	NA	NA	NA	NA	NA	NA	NA	NA
NW_019170544.1	11550917	C	A	ENSAMXT00000019180	ENSAMXG00000018629	NA	UTR_3	NONCODING	NA	NA	NA	NA	NA	NA	novel	NA
NW_019170544.1	11550917	C	T	ENSAMXT00000019180	ENSAMXG00000018629	NA	UTR_3	NONCODING	NA	NA	NA	NA	NA	NA	novel	NA
NW_019170544.1	11550917	C	G	ENSAMXT00000019180	ENSAMXG00000018629	NA	UTR_3	NONCODING	NA	NA	NA	NA	NA	NA	novel	NA
NW_019170544.1	11550919	CTTTTTA	C	ENSAMXT00000019180	ENSAMXG00000018629	NA	UTR_3	NONFRAMESHIFT DELETION	NA	NA	NA	NA	NA	NA	NA	NA
NW_019170544.1	11550941	G	A	ENSAMXT00000019180	ENSAMXG00000018629	NA	UTR_3	NONCODING	NA	NA	NA	NA	NA	NA	novel	NA
NW_019170544.1	11550956	A	G	ENSAMXT00000019180	ENSAMXG00000018629	NA	UTR_3	NONCODING	NA	NA	NA	NA	NA	NA	novel	NA
NW_019170544.1	11550963	A	G	ENSAMXT00000019180	ENSAMXG00000018629	NA	UTR_3	NONCODING	NA	NA	NA	NA	NA	NA	novel	NA
NW_019170544.1	11550968	G	A	ENSAMXT00000019180	ENSAMXG00000018629	NA	UTR_3	NONCODING	NA	NA	NA	NA	NA	NA	novel	NA
NW_019170544.1	11550969	C	T	ENSAMXT00000019180	ENSAMXG00000018629	NA	UTR_3	NONCODING	NA	NA	NA	NA	NA	NA	novel	NA
NW_019170544.1	11550975	T	C	ENSAMXT00000019180	ENSAMXG00000018629	NA	UTR_3	NONCODING	NA	NA	NA	NA	NA	NA	novel	NA
NW_019170544.1	11550991	C	CACAG	ENSAMXT00000019180	ENSAMXG00000018629	NA	UTR_3	FRAMESHIFT INSERTION	NA	NA	NA	NA	NA	NA	NA	NA
NW_019170544.1	11551012	G	A	ENSAMXT00000019180	ENSAMXG00000018629	NA	UTR_3	NONCODING	NA	NA	NA	NA	NA	NA	novel	NA
NW_019170544.1	11551024	T	G	ENSAMXT00000019180	ENSAMXG00000018629	NA	UTR_3	NONCODING	NA	NA	NA	NA	NA	NA	novel	NA
NW_019170544.1	11551025	G	T	ENSAMXT00000019180	ENSAMXG00000018629	NA	UTR_3	NONCODING	NA	NA	NA	NA	NA	NA	novel	NA
NW_019170544.1	11551029	A	C	ENSAMXT00000019180	ENSAMXG00000018629	NA	UTR_3	NONCODING	NA	NA	NA	NA	NA	NA	novel	NA
NW_019170544.1	11551034	C	T	ENSAMXT00000019180	ENSAMXG00000018629	NA	UTR_3	NONCODING	NA	NA	NA	NA	NA	NA	novel	NA
NW_019170544.1	11551036	GA	GAA	ENSAMXT00000019180	ENSAMXG00000018629	NA	UTR_3	FRAMESHIFT INSERTION	NA	NA	NA	NA	NA	NA	NA	NA
NW_019170544.1	11551036	GA	G	ENSAMXT00000019180	ENSAMXG00000018629	NA	UTR_3	FRAMESHIFT DELETION	NA	NA	NA	NA	NA	NA	NA	NA
NW_019170544.1	11551044	G	T	ENSAMXT00000019180	ENSAMXG00000018629	NA	UTR_3	NONCODING	NA	NA	NA	NA	NA	NA	novel	NA
NW_019170544.1	11551053	G	T	ENSAMXT00000019180	ENSAMXG00000018629	NA	UTR_3	NONCODING	NA	NA	NA	NA	NA	NA	novel	NA
NW_019170544.1	11551061	G	GA	ENSAMXT00000019180	ENSAMXG00000018629	NA	UTR_3	FRAMESHIFT INSERTION	NA	NA	NA	NA	NA	NA	NA	NA
NW_019170544.1	11551081	AGAT	A	ENSAMXT00000019180	ENSAMXG00000018629	NA	UTR_3	NONFRAMESHIFT DELETION	NA	NA	NA	NA	NA	NA	NA	NA
NW_019170544.1	11551081	AGAT	GGAT	ENSAMXT00000019180	ENSAMXG00000018629	NA	UTR_3	SUBSTITUTION	NA	NA	NA	NA	NA	NA	NA	NA
NW_019170544.1	11551082	G	T	ENSAMXT00000019180	ENSAMXG00000018629	NA	UTR_3	NONCODING	NA	NA	NA	NA	NA	NA	novel	NA
NW_019170544.1	11551087	AAACATAGGGTC	A	ENSAMXT00000019180	ENSAMXG00000018629	NA	UTR_3	FRAMESHIFT DELETION	NA	NA	NA	NA	NA	NA	NA	NA
NW_019170544.1	11551092	TAGGGTCCTAATTA	T	ENSAMXT00000019180	ENSAMXG00000018629	NA	UTR_3	FRAMESHIFT DELETION	NA	NA	NA	NA	NA	NA	NA	NA
NW_019170544.1	11551096	GTCCTAATTAAGGCTCCGTCTTCTTCTGTCATTTCGTCAGAGTTTAAGACCCTGTAGCCTGT	G	ENSAMXT00000019180	ENSAMXG00000018629	NA	UTR_3	FRAMESHIFT DELETION	NA	NA	NA	NA	NA	NA	NA	NA
NW_019170544.1	11551112	C	G	ENSAMXT00000019180	ENSAMXG00000018629	NA	UTR_3	NONCODING	NA	NA	NA	NA	NA	NA	novel	NA
NW_019170544.1	11551113	G	A	ENSAMXT00000019180	ENSAMXG00000018629	NA	UTR_3	NONCODING	NA	NA	NA	NA	NA	NA	novel	NA
NW_019170544.1	11551134	A	G	ENSAMXT00000019180	ENSAMXG00000018629	NA	UTR_3	NONCODING	NA	NA	NA	NA	NA	NA	novel	NA
NW_019170544.1	11551161	C	T	ENSAMXT00000019180	ENSAMXG00000018629	NA	UTR_3	NONCODING	NA	NA	NA	NA	NA	NA	novel	NA
NW_019170544.1	11551178	C	T	ENSAMXT00000019180	ENSAMXG00000018629	NA	UTR_3	NONCODING	NA	NA	NA	NA	NA	NA	novel	NA
NW_019170544.1	11551181	ATGTGTC	A	ENSAMXT00000019180	ENSAMXG00000018629	NA	UTR_3	NONFRAMESHIFT DELETION	NA	NA	NA	NA	NA	NA	NA	NA
NW_019170544.1	11551187	CTG	C	ENSAMXT00000019180	ENSAMXG00000018629	NA	UTR_3	FRAMESHIFT DELETION	NA	NA	NA	NA	NA	NA	NA	NA
NW_019170544.1	11551202	C	T	ENSAMXT00000019180	ENSAMXG00000018629	NA	UTR_3	NONCODING	NA	NA	NA	NA	NA	NA	novel	NA
NW_019170544.1	11551215	T	C	ENSAMXT00000019180	ENSAMXG00000018629	NA	UTR_3	NONCODING	NA	NA	NA	NA	NA	NA	novel	NA
NW_019170544.1	11551219	CAT	C	ENSAMXT00000019180	ENSAMXG00000018629	NA	UTR_3	FRAMESHIFT DELETION	NA	NA	NA	NA	NA	NA	NA	NA
NW_019170544.1	11551219	CAT	GAT	ENSAMXT00000019180	ENSAMXG00000018629	NA	UTR_3	SUBSTITUTION	NA	NA	NA	NA	NA	NA	NA	NA
NW_019170544.1	11551229	C	A	ENSAMXT00000019180	ENSAMXG00000018629	NA	UTR_3	NONCODING	NA	NA	NA	NA	NA	NA	novel	NA
NW_019170544.1	11551231	GCAAGGCCATTT	G	ENSAMXT00000019180	ENSAMXG00000018629	NA	UTR_3	FRAMESHIFT DELETION	NA	NA	NA	NA	NA	NA	NA	NA
NW_019170544.1	11551231	GCAAGGCCATTT	ACAAGGCCATTT	ENSAMXT00000019180	ENSAMXG00000018629	NA	UTR_3	SUBSTITUTION	NA	NA	NA	NA	NA	NA	NA	NA
NW_019170544.1	11551232	C	A	ENSAMXT00000019180	ENSAMXG00000018629	NA	UTR_3	NONCODING	NA	NA	NA	NA	NA	NA	novel	NA
NW_019170544.1	11551238	C	A	ENSAMXT00000019180	ENSAMXG00000018629	NA	UTR_3	NONCODING	NA	NA	NA	NA	NA	NA	novel	NA
NW_019170544.1	11551239	A	G	ENSAMXT00000019180	ENSAMXG00000018629	NA	UTR_3	NONCODING	NA	NA	NA	NA	NA	NA	novel	NA
NW_019170544.1	11551253	T	A	ENSAMXT00000019180	ENSAMXG00000018629	NA	UTR_3	NONCODING	NA	NA	NA	NA	NA	NA	novel	NA
NW_019170544.1	11551256	T	TTATG	ENSAMXT00000019180	ENSAMXG00000018629	NA	UTR_3	FRAMESHIFT INSERTION	NA	NA	NA	NA	NA	NA	NA	NA
NW_019170544.1	11551259	T	C	ENSAMXT00000019180	ENSAMXG00000018629	NA	UTR_3	NONCODING	NA	NA	NA	NA	NA	NA	novel	NA
NW_019170544.1	11551262	C	T	ENSAMXT00000019180	ENSAMXG00000018629	NA	CDS	SYNONYMOUS	*	*	1262	NA	NA	NA	novel	NA
NW_019170544.1	11551265	C	A	ENSAMXT00000019180	ENSAMXG00000018629	NA	CDS	NONSYNONYMOUS	E	D	1261	0.09	3.05	238	novel	TOLERATED
NW_019170544.1	11551297	G	A	ENSAMXT00000019180	ENSAMXG00000018629	NA	CDS	NONSYNONYMOUS	R	C	1251	0.01	3.06	254	novel	DELETERIOUS
NW_019170544.1	11551304	G	A	ENSAMXT00000019180	ENSAMXG00000018629	NA	CDS	SYNONYMOUS	S	S	1248	1	3.05	255	novel	TOLERATED
NW_019170544.1	11551315	G	C	ENSAMXT00000019180	ENSAMXG00000018629	NA	CDS	NONSYNONYMOUS	L	V	1245	0	3.05	256	novel	DELETERIOUS
NW_019170544.1	11551316	T	C	ENSAMXT00000019180	ENSAMXG00000018629	NA	CDS	SYNONYMOUS	V	V	1244	1	3.05	256	novel	TOLERATED
NW_019170544.1	11551318	C	T	ENSAMXT00000019180	ENSAMXG00000018629	NA	CDS	NONSYNONYMOUS	V	I	1244	0.09	3.05	256	novel	TOLERATED
NW_019170544.1	11551319	G	A	ENSAMXT00000019180	ENSAMXG00000018629	NA	CDS	SYNONYMOUS	Y	Y	1243	1	3.05	256	novel	TOLERATED
NW_019170544.1	11551319	G	T	ENSAMXT00000019180	ENSAMXG00000018629	NA	CDS	STOP-GAIN	Y	*	1243	NA	NA	NA	novel	NA
NW_019170544.1	11551349	A	T	ENSAMXT00000019180	ENSAMXG00000018629	NA	CDS	SYNONYMOUS	V	V	1233	1	3.05	260	novel	TOLERATED
NW_019170544.1	11551353	C	G	ENSAMXT00000019180	ENSAMXG00000018629	NA	CDS	NONSYNONYMOUS	S	T	1232	0.94	3.05	260	novel	TOLERATED
NW_019170544.1	11551400	G	C	ENSAMXT00000019180	ENSAMXG00000018629	NA	CDS	NONSYNONYMOUS	D	E	1216	0.01	3.05	260	novel	DELETERIOUS
NW_019170544.1	11551408	C	T	ENSAMXT00000019180	ENSAMXG00000018629	NA	CDS	NONSYNONYMOUS	V	M	1214	0	3.05	260	novel	DELETERIOUS
NW_019170544.1	11551409	G	A	ENSAMXT00000019180	ENSAMXG00000018629	NA	CDS	SYNONYMOUS	F	F	1213	0.15	3.05	261	novel	TOLERATED
NW_019170544.1	11551424	T	C	ENSAMXT00000019180	ENSAMXG00000018629	NA	CDS	SYNONYMOUS	A	A	1208	0.59	3.05	259	novel	TOLERATED
NW_019170544.1	11551426	C	T	ENSAMXT00000019180	ENSAMXG00000018629	NA	CDS	NONSYNONYMOUS	A	T	1208	0.69	3.05	259	novel	TOLERATED
NW_019170544.1	11551428	C	T	ENSAMXT00000019180	ENSAMXG00000018629	NA	CDS	NONSYNONYMOUS	G	D	1207	0.02	3.03	250	novel	DELETERIOUS
NW_019170544.1	11551429	C	T	ENSAMXT00000019180	ENSAMXG00000018629	NA	CDS	NONSYNONYMOUS	G	S	1207	0.4	3.03	250	novel	TOLERATED
NW_019170544.1	11551435	GCT	G	ENSAMXT00000019180	ENSAMXG00000018629	NA	CDS	FRAMESHIFT DELETION	NA	NA	NA	NA	NA	NA	NA	NA
NW_019170544.1	11551438	T	TCC	ENSAMXT00000019180	ENSAMXG00000018629	NA	CDS	FRAMESHIFT INSERTION	NA	NA	NA	NA	NA	NA	NA	NA
NW_019170544.1	11551439	G	A	ENSAMXT00000019180	ENSAMXG00000018629	NA	CDS	SYNONYMOUS	P	P	1203	0.3	3.06	247	novel	TOLERATED
NW_019170544.1	11551442	A	T	ENSAMXT00000019180	ENSAMXG00000018629	NA	CDS	SYNONYMOUS	G	G	1202	1	3.06	250	novel	TOLERATED
NW_019170544.1	11551446	C	T	ENSAMXT00000019180	ENSAMXG00000018629	NA	CDS	NONSYNONYMOUS	S	N	1201	0.51	3.07	198	novel	TOLERATED
NW_019170544.1	11551447	T	G	ENSAMXT00000019180	ENSAMXG00000018629	NA	CDS	NONSYNONYMOUS	S	R	1201	0.96	3.07	198	novel	TOLERATED
NW_019170544.1	11551450	T	C	ENSAMXT00000019180	ENSAMXG00000018629	NA	CDS	NONSYNONYMOUS	N	D	1200	0.03	3.07	199	novel	DELETERIOUS
NW_019170544.1	11552380	G	T	ENSAMXT00000019180	ENSAMXG00000018629	NA	CDS	NONSYNONYMOUS	D	E	1192	0.04	3.04	264	novel	DELETERIOUS
NW_019170544.1	11552383	C	T	ENSAMXT00000019180	ENSAMXG00000018629	NA	CDS	SYNONYMOUS	K	K	1191	1	3.04	263	novel	TOLERATED
NW_019170544.1	11552391	T	G	ENSAMXT00000019180	ENSAMXG00000018629	NA	CDS	SYNONYMOUS	R	R	1189	1	3.04	263	novel	TOLERATED
NW_019170544.1	11552402	G	T	ENSAMXT00000019180	ENSAMXG00000018629	NA	CDS	NONSYNONYMOUS	T	K	1185	0.05	3.05	266	novel	TOLERATED
NW_019170544.1	11552431	C	A	ENSAMXT00000019180	ENSAMXG00000018629	NA	CDS	NONSYNONYMOUS	R	S	1175	0.05	3.05	268	novel	TOLERATED
NW_019170544.1	11552435	T	C	ENSAMXT00000019180	ENSAMXG00000018629	NA	CDS	NONSYNONYMOUS	N	S	1174	0.07	3.05	268	novel	TOLERATED
NW_019170544.1	11552447	G	C	ENSAMXT00000019180	ENSAMXG00000018629	NA	CDS	NONSYNONYMOUS	T	S	1170	1	3.05	268	novel	TOLERATED
NW_019170544.1	11552460	C	T	ENSAMXT00000019180	ENSAMXG00000018629	NA	CDS	NONSYNONYMOUS	V	I	1166	0.53	3.05	269	novel	TOLERATED
NW_019170544.1	11552467	C	T	ENSAMXT00000019180	ENSAMXG00000018629	NA	CDS	SYNONYMOUS	V	V	1163	0.71	3.05	269	novel	TOLERATED
NW_019170544.1	11552497	G	A	ENSAMXT00000019180	ENSAMXG00000018629	NA	CDS	SYNONYMOUS	T	T	1153	1	3.05	265	novel	TOLERATED
NW_019170544.1	11552506	C	G	ENSAMXT00000019180	ENSAMXG00000018629	NA	CDS	NONSYNONYMOUS	E	D	1150	0.01	3.05	267	novel	DELETERIOUS
NW_019170544.1	11553993	A	T	ENSAMXT00000019180	ENSAMXG00000018629	NA	CDS	SYNONYMOUS	V	V	1146	0.04	3.06	261	novel	DELETERIOUS
NW_019170544.1	11554002	C	T	ENSAMXT00000019180	ENSAMXG00000018629	NA	CDS	SYNONYMOUS	L	L	1143	0.7	3.05	267	novel	TOLERATED
NW_019170544.1	11554005	G	A	ENSAMXT00000019180	ENSAMXG00000018629	NA	CDS	SYNONYMOUS	F	F	1142	1	3.05	266	novel	TOLERATED
NW_019170544.1	11554009	C	T	ENSAMXT00000019180	ENSAMXG00000018629	NA	CDS	NONSYNONYMOUS	S	N	1141	0.12	3.05	266	novel	TOLERATED
NW_019170544.1	11554049	T	A	ENSAMXT00000019180	ENSAMXG00000018629	NA	CDS	NONSYNONYMOUS	I	L	1128	1	3.03	264	novel	TOLERATED
NW_019170544.1	11554068	T	C	ENSAMXT00000019180	ENSAMXG00000018629	NA	CDS	SYNONYMOUS	S	S	1121	0.64	3.03	262	novel	TOLERATED
NW_019170544.1	11554074	A	G	ENSAMXT00000019180	ENSAMXG00000018629	NA	CDS	SYNONYMOUS	N	N	1119	1	3.03	264	novel	TOLERATED
NW_019170544.1	11554311	G	A	ENSAMXT00000019180	ENSAMXG00000018629	NA	CDS	SYNONYMOUS	C	C	1107	1	3.04	279	novel	TOLERATED
NW_019170544.1	11554320	A	C	ENSAMXT00000019180	ENSAMXG00000018629	NA	CDS	SYNONYMOUS	T	T	1104	0.98	3.04	279	novel	TOLERATED
NW_019170544.1	11554320	A	T	ENSAMXT00000019180	ENSAMXG00000018629	NA	CDS	SYNONYMOUS	T	T	1104	0.98	3.04	279	novel	TOLERATED
NW_019170544.1	11554321	G	A	ENSAMXT00000019180	ENSAMXG00000018629	NA	CDS	NONSYNONYMOUS	T	I	1104	0.44	3.04	279	novel	TOLERATED
NW_019170544.1	11554323	T	C	ENSAMXT00000019180	ENSAMXG00000018629	NA	CDS	SYNONYMOUS	G	G	1103	1	3.03	278	novel	TOLERATED
NW_019170544.1	11554327	T	C	ENSAMXT00000019180	ENSAMXG00000018629	NA	CDS	NONSYNONYMOUS	N	S	1102	0.41	3.02	280	novel	TOLERATED
NW_019170544.1	11554330	T	A	ENSAMXT00000019180	ENSAMXG00000018629	NA	CDS	NONSYNONYMOUS	H	L	1101	0.05	3.02	280	novel	TOLERATED
NW_019170544.1	11554338	A	T	ENSAMXT00000019180	ENSAMXG00000018629	NA	CDS	SYNONYMOUS	I	I	1098	1	3.01	282	novel	TOLERATED
NW_019170544.1	11554343	AGG	A	ENSAMXT00000019180	ENSAMXG00000018629	NA	CDS	FRAMESHIFT DELETION	NA	NA	NA	NA	NA	NA	NA	NA
NW_019170544.1	11554346	C	CAT	ENSAMXT00000019180	ENSAMXG00000018629	NA	CDS	FRAMESHIFT INSERTION	NA	NA	NA	NA	NA	NA	NA	NA
NW_019170544.1	11554349	G	A	ENSAMXT00000019180	ENSAMXG00000018629	NA	CDS	SYNONYMOUS	L	L	1095	1	3.04	281	novel	TOLERATED
NW_019170544.1	11554364	G	A	ENSAMXT00000019180	ENSAMXG00000018629	NA	CDS	SYNONYMOUS	L	L	1090	1	3.02	282	novel	TOLERATED
NW_019170544.1	11554365	A	G	ENSAMXT00000019180	ENSAMXG00000018629	NA	CDS	SYNONYMOUS	H	H	1089	0.48	3.02	282	novel	TOLERATED
NW_019170544.1	11554371	C	T	ENSAMXT00000019180	ENSAMXG00000018629	NA	CDS	SYNONYMOUS	Q	Q	1087	1	3.01	283	novel	TOLERATED
NW_019170544.1	11554371	C	G	ENSAMXT00000019180	ENSAMXG00000018629	NA	CDS	NONSYNONYMOUS	Q	H	1087	0.31	3.01	283	novel	TOLERATED
NW_019170544.1	11554392	A	T	ENSAMXT00000019180	ENSAMXG00000018629	NA	CDS	SYNONYMOUS	L	L	1080	0.07	3.02	291	novel	TOLERATED
NW_019170544.1	11554409	T	C	ENSAMXT00000019180	ENSAMXG00000018629	NA	CDS	NONSYNONYMOUS	I	V	1075	0.01	3.05	290	novel	DELETERIOUS
NW_019170544.1	11554441	T	G	ENSAMXT00000019180	ENSAMXG00000018629	NA	CDS	NONSYNONYMOUS	Q	P	1064	0.18	3.03	271	novel	TOLERATED
NW_019170544.1	11555137	G	C	ENSAMXT00000019180	ENSAMXG00000018629	NA	CDS	NONSYNONYMOUS	T	S	1057	0.76	3.05	231	novel	TOLERATED
NW_019170544.1	11555143	T	C	ENSAMXT00000019180	ENSAMXG00000018629	NA	CDS	NONSYNONYMOUS	E	G	1055	0.04	3.04	228	novel	DELETERIOUS
NW_019170544.1	11555148	T	C	ENSAMXT00000019180	ENSAMXG00000018629	NA	CDS	SYNONYMOUS	L	L	1053	0.66	3.03	287	novel	TOLERATED
NW_019170544.1	11555157	G	A	ENSAMXT00000019180	ENSAMXG00000018629	NA	CDS	SYNONYMOUS	D	D	1050	0.63	3.02	291	novel	TOLERATED
NW_019170544.1	11555163	C	A	ENSAMXT00000019180	ENSAMXG00000018629	NA	CDS	SYNONYMOUS	V	V	1048	1	3.02	295	novel	TOLERATED
NW_019170544.1	11555178	G	A	ENSAMXT00000019180	ENSAMXG00000018629	NA	CDS	SYNONYMOUS	D	D	1043	0.63	3.02	296	novel	TOLERATED
NW_019170544.1	11555215	TTGA	T	ENSAMXT00000019180	ENSAMXG00000018629	NA	CDS	NONFRAMESHIFT DELETION	NA	NA	NA	NA	NA	NA	NA	NA
NW_019170544.1	11555255	C	T	ENSAMXT00000019180	ENSAMXG00000018629	NA	CDS	NONSYNONYMOUS	V	I	1018	0.01	3.02	291	novel	DELETERIOUS
NW_019170544.1	11555284	T	G	ENSAMXT00000019180	ENSAMXG00000018629	NA	CDS	NONSYNONYMOUS	N	T	1008	0.16	3.02	282	novel	TOLERATED
NW_019170544.1	11556302	G	T	ENSAMXT00000019180	ENSAMXG00000018629	NA	CDS	SYNONYMOUS	I	I	1000	1	3.03	244	novel	TOLERATED
NW_019170544.1	11556329	A	T	ENSAMXT00000019180	ENSAMXG00000018629	NA	CDS	SYNONYMOUS	A	A	991	0.62	3.02	295	novel	TOLERATED
NW_019170544.1	11556331	C	A	ENSAMXT00000019180	ENSAMXG00000018629	NA	CDS	NONSYNONYMOUS	A	S	991	1	3.02	295	novel	TOLERATED
NW_019170544.1	11556346	C	A	ENSAMXT00000019180	ENSAMXG00000018629	NA	CDS	NONSYNONYMOUS	V	L	986	0.07	3.02	295	novel	TOLERATED
NW_019170544.1	11556356	G	A	ENSAMXT00000019180	ENSAMXG00000018629	NA	CDS	SYNONYMOUS	N	N	982	0.17	3.02	295	novel	TOLERATED
NW_019170544.1	11556359	C	A	ENSAMXT00000019180	ENSAMXG00000018629	NA	CDS	SYNONYMOUS	G	G	981	0.15	3.02	294	novel	TOLERATED
NW_019170544.1	11556386	T	C	ENSAMXT00000019180	ENSAMXG00000018629	NA	CDS	SYNONYMOUS	G	G	972	0.37	3.03	237	novel	TOLERATED
NW_019170544.1	11556390	T	C	ENSAMXT00000019180	ENSAMXG00000018629	NA	CDS	NONSYNONYMOUS	D	G	971	0.18	3.02	238	novel	TOLERATED
NW_019170544.1	11556396	TCA	T	ENSAMXT00000019180	ENSAMXG00000018629	NA	CDS	FRAMESHIFT DELETION	NA	NA	NA	NA	NA	NA	NA	NA
NW_019170544.1	11556402	TC	T	ENSAMXT00000019180	ENSAMXG00000018629	NA	CDS	FRAMESHIFT DELETION	NA	NA	NA	NA	NA	NA	NA	NA
NW_019170544.1	11556405	GAGGAA	G	ENSAMXT00000019180	ENSAMXG00000018629	NA	CDS	FRAMESHIFT DELETION	NA	NA	NA	NA	NA	NA	NA	NA
NW_019170544.1	11556412	A	ATTCCT	ENSAMXT00000019180	ENSAMXG00000018629	NA	CDS	FRAMESHIFT INSERTION	NA	NA	NA	NA	NA	NA	NA	NA
NW_019170544.1	11556414	A	AG	ENSAMXT00000019180	ENSAMXG00000018629	NA	CDS	FRAMESHIFT INSERTION	NA	NA	NA	NA	NA	NA	NA	NA
NW_019170544.1	11556416	C	T	ENSAMXT00000019180	ENSAMXG00000018629	NA	CDS	SYNONYMOUS	Q	Q	962	1	3.03	287	novel	TOLERATED
NW_019170544.1	11556416	C	CTG	ENSAMXT00000019180	ENSAMXG00000018629	NA	CDS	FRAMESHIFT INSERTION	NA	NA	NA	NA	NA	NA	NA	NA
NW_019170544.1	11556729	A	G	ENSAMXT00000019180	ENSAMXG00000018629	NA	CDS	NONSYNONYMOUS	I	T	941	0	3.02	299	novel	DELETERIOUS
NW_019170544.1	11556749	C	T	ENSAMXT00000019180	ENSAMXG00000018629	NA	CDS	SYNONYMOUS	V	V	934	0.05	3.02	300	novel	TOLERATED
NW_019170544.1	11557096	G	A	ENSAMXT00000019180	ENSAMXG00000018629	NA	CDS	SYNONYMOUS	A	A	916	1	3.02	299	novel	TOLERATED
NW_019170544.1	11557111	A	C	ENSAMXT00000019180	ENSAMXG00000018629	NA	CDS	SYNONYMOUS	A	A	911	1	3.02	299	novel	TOLERATED
NW_019170544.1	11557126	C	T	ENSAMXT00000019180	ENSAMXG00000018629	NA	CDS	SYNONYMOUS	T	T	906	0.87	3.02	298	novel	TOLERATED
NW_019170544.1	11557128	T	G	ENSAMXT00000019180	ENSAMXG00000018629	NA	CDS	NONSYNONYMOUS	T	P	906	0.52	3.02	298	novel	TOLERATED
NW_019170544.1	11557141	C	G	ENSAMXT00000019180	ENSAMXG00000018629	NA	CDS	SYNONYMOUS	G	G	901	1	3.02	299	novel	TOLERATED
NW_019170544.1	11557161	G	T	ENSAMXT00000019180	ENSAMXG00000018629	NA	CDS	NONSYNONYMOUS	L	I	895	0	3.02	299	novel	DELETERIOUS
NW_019170544.1	11557168	G	A	ENSAMXT00000019180	ENSAMXG00000018629	NA	CDS	SYNONYMOUS	N	N	892	1	3.02	299	novel	TOLERATED
NW_019170544.1	11557184	T	A	ENSAMXT00000019180	ENSAMXG00000018629	NA	CDS	NONSYNONYMOUS	Q	L	887	0	3.02	298	novel	DELETERIOUS
NW_019170544.1	11557197	G	A	ENSAMXT00000019180	ENSAMXG00000018629	NA	CDS	NONSYNONYMOUS	P	S	883	0	3.02	297	novel	DELETERIOUS
NW_019170544.1	11557928	A	T	ENSAMXT00000019180	ENSAMXG00000018629	NA	CDS	NONSYNONYMOUS	D	E	879	0.31	3.02	302	novel	TOLERATED
NW_019170544.1	11557949	G	T	ENSAMXT00000019180	ENSAMXG00000018629	NA	CDS	SYNONYMOUS	A	A	872	1	3.04	300	novel	TOLERATED
NW_019170544.1	11557993	A	T	ENSAMXT00000019180	ENSAMXG00000018629	NA	CDS	NONSYNONYMOUS	S	T	858	1	3.01	303	novel	TOLERATED
NW_019170544.1	11558013	T	A	ENSAMXT00000019180	ENSAMXG00000018629	NA	CDS	NONSYNONYMOUS	Y	F	851	0.01	3.04	304	novel	DELETERIOUS
NW_019170544.1	11558028	C	G	ENSAMXT00000019180	ENSAMXG00000018629	NA	CDS	NONSYNONYMOUS	S	T	846	0.43	3.04	304	novel	TOLERATED
NW_019170544.1	11558070	G	A	ENSAMXT00000019180	ENSAMXG00000018629	NA	CDS	NONSYNONYMOUS	P	L	832	0.02	3.05	303	novel	DELETERIOUS
NW_019170544.1	11558077	C	T	ENSAMXT00000019180	ENSAMXG00000018629	NA	CDS	NONSYNONYMOUS	A	T	830	0.74	3.05	303	novel	TOLERATED
NW_019170544.1	11559910	T	C	ENSAMXT00000019180	ENSAMXG00000018629	NA	CDS	NONSYNONYMOUS	I	V	823	0.01	3.04	305	novel	DELETERIOUS
NW_019170544.1	11559923	G	A	ENSAMXT00000019180	ENSAMXG00000018629	NA	CDS	SYNONYMOUS	T	T	818	1	3.04	306	novel	TOLERATED
NW_019170544.1	11559935	A	G	ENSAMXT00000019180	ENSAMXG00000018629	NA	CDS	SYNONYMOUS	Y	Y	814	1	3.04	306	novel	TOLERATED
NW_019170544.1	11559953	G	A	ENSAMXT00000019180	ENSAMXG00000018629	NA	CDS	SYNONYMOUS	T	T	808	1	3.04	306	novel	TOLERATED
NW_019170544.1	11559967	A	G	ENSAMXT00000019180	ENSAMXG00000018629	NA	CDS	SYNONYMOUS	L	L	804	1	3.04	306	novel	TOLERATED
NW_019170544.1	11560015	C	G	ENSAMXT00000019180	ENSAMXG00000018629	NA	CDS	NONSYNONYMOUS	V	L	788	0	3.04	309	novel	DELETERIOUS
NW_019170544.1	11560031	G	A	ENSAMXT00000019180	ENSAMXG00000018629	NA	CDS	SYNONYMOUS	Y	Y	782	1	3.01	309	novel	TOLERATED
NW_019170544.1	11560043	A	G	ENSAMXT00000019180	ENSAMXG00000018629	NA	CDS	SYNONYMOUS	N	N	778	1	3.01	309	novel	TOLERATED
NW_019170544.1	11560046	A	T	ENSAMXT00000019180	ENSAMXG00000018629	NA	CDS	NONSYNONYMOUS	N	K	777	1	3.01	309	novel	TOLERATED
NW_019170544.1	11560073	C	A	ENSAMXT00000019180	ENSAMXG00000018629	NA	CDS	SYNONYMOUS	P	P	768	1	3.01	304	novel	TOLERATED
NW_019170544.1	11560073	C	T	ENSAMXT00000019180	ENSAMXG00000018629	NA	CDS	SYNONYMOUS	P	P	768	1	3.01	304	novel	TOLERATED
NW_019170544.1	11560091	G	A	ENSAMXT00000019180	ENSAMXG00000018629	NA	CDS	SYNONYMOUS	A	A	762	1	3.01	306	novel	TOLERATED
NW_019170544.1	11560103	C	T	ENSAMXT00000019180	ENSAMXG00000018629	NA	CDS	SYNONYMOUS	T	T	758	1	3.02	303	novel	TOLERATED
NW_019170544.1	11560104	G	A	ENSAMXT00000019180	ENSAMXG00000018629	NA	CDS	NONSYNONYMOUS	T	M	758	0.08	3.02	303	novel	TOLERATED
NW_019170544.1	11560118	C	T	ENSAMXT00000019180	ENSAMXG00000018629	NA	CDS	SYNONYMOUS	T	T	753	1	3.01	305	novel	TOLERATED
NW_019170544.1	11560130	T	A	ENSAMXT00000019180	ENSAMXG00000018629	NA	CDS	SYNONYMOUS	R	R	749	1	3.01	304	novel	TOLERATED
NW_019170544.1	11560139	A	C	ENSAMXT00000019180	ENSAMXG00000018629	NA	CDS	NONSYNONYMOUS	D	E	746	1	3.01	305	novel	TOLERATED
NW_019170544.1	11560139	A	G	ENSAMXT00000019180	ENSAMXG00000018629	NA	CDS	SYNONYMOUS	D	D	746	0.3	3.01	305	novel	TOLERATED
NW_019170544.1	11560150	T	G	ENSAMXT00000019180	ENSAMXG00000018629	NA	CDS	NONSYNONYMOUS	I	L	743	0.01	3.01	305	novel	DELETERIOUS
NW_019170544.1	11560151	T	C	ENSAMXT00000019180	ENSAMXG00000018629	NA	CDS	SYNONYMOUS	V	V	742	0.04	3.01	304	novel	DELETERIOUS
NW_019170544.1	11560154	C	T	ENSAMXT00000019180	ENSAMXG00000018629	NA	CDS	SYNONYMOUS	K	K	741	1	3.01	305	novel	TOLERATED
NW_019170544.1	11560157	A	C	ENSAMXT00000019180	ENSAMXG00000018629	NA	CDS	NONSYNONYMOUS	H	Q	740	1	3.02	304	novel	TOLERATED
NW_019170544.1	11562054	T	C	ENSAMXT00000019180	ENSAMXG00000018629	NA	CDS	SYNONYMOUS	T	T	733	0.01	3.02	307	novel	DELETERIOUS
NW_019170544.1	11562056	T	C	ENSAMXT00000019180	ENSAMXG00000018629	NA	CDS	NONSYNONYMOUS	T	A	733	0.02	3.02	307	novel	DELETERIOUS
NW_019170544.1	11562057	G	A	ENSAMXT00000019180	ENSAMXG00000018629	NA	CDS	SYNONYMOUS	F	F	732	1	3.02	307	novel	TOLERATED
NW_019170544.1	11562060	C	T	ENSAMXT00000019180	ENSAMXG00000018629	NA	CDS	SYNONYMOUS	L	L	731	1	3.02	307	novel	TOLERATED
NW_019170544.1	11562067	T	C	ENSAMXT00000019180	ENSAMXG00000018629	NA	CDS	NONSYNONYMOUS	H	R	729	0.06	3.04	306	novel	TOLERATED
NW_019170544.1	11562070	A	G	ENSAMXT00000019180	ENSAMXG00000018629	NA	CDS	NONSYNONYMOUS	I	T	728	0.01	3.04	306	novel	DELETERIOUS
NW_019170544.1	11562078	A	G	ENSAMXT00000019180	ENSAMXG00000018629	NA	CDS	SYNONYMOUS	I	I	725	0.36	3.04	306	novel	TOLERATED
NW_019170544.1	11562096	C	T	ENSAMXT00000019180	ENSAMXG00000018629	NA	CDS	SYNONYMOUS	S	S	719	1	3.02	309	novel	TOLERATED
NW_019170544.1	11562096	C	G	ENSAMXT00000019180	ENSAMXG00000018629	NA	CDS	SYNONYMOUS	S	S	719	1	3.02	309	novel	TOLERATED
NW_019170544.1	11562099	C	G	ENSAMXT00000019180	ENSAMXG00000018629	NA	CDS	NONSYNONYMOUS	E	D	718	0.01	3.02	309	novel	DELETERIOUS
NW_019170544.1	11562114	T	C	ENSAMXT00000019180	ENSAMXG00000018629	NA	CDS	SYNONYMOUS	V	V	713	1	3.02	308	novel	TOLERATED
NW_019170544.1	11562116	C	A	ENSAMXT00000019180	ENSAMXG00000018629	NA	CDS	NONSYNONYMOUS	V	L	713	0.02	3.02	308	novel	DELETERIOUS
NW_019170544.1	11562122	C	G	ENSAMXT00000019180	ENSAMXG00000018629	NA	CDS	NONSYNONYMOUS	E	Q	711	0.02	3.02	308	novel	DELETERIOUS
NW_019170544.1	11562135	G	T	ENSAMXT00000019180	ENSAMXG00000018629	NA	CDS	SYNONYMOUS	S	S	706	0.06	3.02	309	novel	TOLERATED
NW_019170544.1	11562140	T	A	ENSAMXT00000019180	ENSAMXG00000018629	NA	CDS	NONSYNONYMOUS	S	C	705	0.02	3.02	309	novel	DELETERIOUS
NW_019170544.1	11562144	A	G	ENSAMXT00000019180	ENSAMXG00000018629	NA	CDS	SYNONYMOUS	P	P	703	1	3.02	310	novel	TOLERATED
NW_019170544.1	11562156	T	C	ENSAMXT00000019180	ENSAMXG00000018629	NA	CDS	SYNONYMOUS	K	K	699	1	3.02	310	novel	TOLERATED
NW_019170544.1	11562165	G	A	ENSAMXT00000019180	ENSAMXG00000018629	NA	CDS	SYNONYMOUS	H	H	696	1	3.03	306	novel	TOLERATED
NW_019170544.1	11562168	T	G	ENSAMXT00000019180	ENSAMXG00000018629	NA	CDS	SYNONYMOUS	V	V	695	0.03	3.02	298	novel	DELETERIOUS
NW_019170544.1	11562171	A	T	ENSAMXT00000019180	ENSAMXG00000018629	NA	CDS	NONSYNONYMOUS	D	E	694	0.19	3.03	299	novel	TOLERATED
NW_019170544.1	11562179	C	T	ENSAMXT00000019180	ENSAMXG00000018629	NA	CDS	NONSYNONYMOUS	V	M	692	0.06	3.02	281	novel	TOLERATED
NW_019170544.1	11562228	G	T	ENSAMXT00000019180	ENSAMXG00000018629	NA	CDS	NONSYNONYMOUS	D	E	675	1	3.02	304	novel	TOLERATED
NW_019170544.1	11562240	C	G	ENSAMXT00000019180	ENSAMXG00000018629	NA	CDS	NONSYNONYMOUS	E	D	671	0.67	3.02	303	novel	TOLERATED
NW_019170544.1	11562249	C	G	ENSAMXT00000019180	ENSAMXG00000018629	NA	CDS	SYNONYMOUS	V	V	668	0.28	3.01	302	novel	TOLERATED
NW_019170544.1	11562269	G	A	ENSAMXT00000019180	ENSAMXG00000018629	NA	CDS	SYNONYMOUS	L	L	662	1	3.01	302	novel	TOLERATED
NW_019170544.1	11562276	C	T	ENSAMXT00000019180	ENSAMXG00000018629	NA	CDS	SYNONYMOUS	V	V	659	1	3.01	302	novel	TOLERATED
NW_019170544.1	11562279	C	T	ENSAMXT00000019180	ENSAMXG00000018629	NA	CDS	SYNONYMOUS	L	L	658	1	3.01	302	novel	TOLERATED
NW_019170544.1	11562282	G	C	ENSAMXT00000019180	ENSAMXG00000018629	NA	CDS	SYNONYMOUS	T	T	657	0.42	3.01	303	novel	TOLERATED
NW_019170544.1	11562284	T	C	ENSAMXT00000019180	ENSAMXG00000018629	NA	CDS	NONSYNONYMOUS	T	A	657	0.53	3.01	303	novel	TOLERATED
NW_019170544.1	11562287	G	A	ENSAMXT00000019180	ENSAMXG00000018629	NA	CDS	NONSYNONYMOUS	R	W	656	0	3.01	303	novel	DELETERIOUS
NW_019170544.1	11562288	C	G	ENSAMXT00000019180	ENSAMXG00000018629	NA	CDS	SYNONYMOUS	V	V	655	1	3.02	304	novel	TOLERATED
NW_019170544.1	11562300	A	C	ENSAMXT00000019180	ENSAMXG00000018629	NA	CDS	SYNONYMOUS	P	P	651	1	3.02	305	novel	TOLERATED
NW_019170544.1	11562300	A	G	ENSAMXT00000019180	ENSAMXG00000018629	NA	CDS	SYNONYMOUS	P	P	651	1	3.02	305	novel	TOLERATED
NW_019170544.1	11562329	G	A	ENSAMXT00000019180	ENSAMXG00000018629	NA	CDS	SYNONYMOUS	L	L	642	1	3.02	305	novel	TOLERATED
NW_019170544.1	11562334	A	T	ENSAMXT00000019180	ENSAMXG00000018629	NA	CDS	NONSYNONYMOUS	L	Q	640	1	3.02	305	novel	TOLERATED
NW_019170544.1	11562348	A	G	ENSAMXT00000019180	ENSAMXG00000018629	NA	CDS	SYNONYMOUS	A	A	635	1	3.02	304	novel	TOLERATED
NW_019170544.1	11562364	G	T	ENSAMXT00000019180	ENSAMXG00000018629	NA	CDS	NONSYNONYMOUS	S	Y	630	0	3.02	304	novel	DELETERIOUS
NW_019170544.1	11562374	T	A	ENSAMXT00000019180	ENSAMXG00000018629	NA	CDS	NONSYNONYMOUS	T	S	627	0.14	3.02	304	novel	TOLERATED
NW_019170544.1	11562387	G	A	ENSAMXT00000019180	ENSAMXG00000018629	NA	CDS	SYNONYMOUS	R	R	622	1	3.02	305	novel	TOLERATED
NW_019170544.1	11562393	G	A	ENSAMXT00000019180	ENSAMXG00000018629	NA	CDS	SYNONYMOUS	Y	Y	620	1	3.02	305	novel	TOLERATED
NW_019170544.1	11562410	G	A	ENSAMXT00000019180	ENSAMXG00000018629	NA	CDS	SYNONYMOUS	L	L	615	1	3.02	307	novel	TOLERATED
NW_019170544.1	11562427	G	C	ENSAMXT00000019180	ENSAMXG00000018629	NA	CDS	NONSYNONYMOUS	T	S	609	0.17	3.02	306	novel	TOLERATED
NW_019170544.1	11562431	A	C	ENSAMXT00000019180	ENSAMXG00000018629	NA	CDS	NONSYNONYMOUS	S	A	608	0.81	3.02	306	novel	TOLERATED
NW_019170544.1	11562459	G	T	ENSAMXT00000019180	ENSAMXG00000018629	NA	CDS	SYNONYMOUS	T	T	598	0.07	3.02	305	novel	TOLERATED
NW_019170544.1	11562480	G	A	ENSAMXT00000019180	ENSAMXG00000018629	NA	CDS	SYNONYMOUS	H	H	591	0.13	3.04	304	novel	TOLERATED
NW_019170544.1	11562482	G	A	ENSAMXT00000019180	ENSAMXG00000018629	NA	CDS	NONSYNONYMOUS	H	Y	591	0.01	3.04	304	novel	DELETERIOUS
NW_019170544.1	11562498	A	T	ENSAMXT00000019180	ENSAMXG00000018629	NA	CDS	SYNONYMOUS	L	L	585	1	3.02	304	novel	TOLERATED
NW_019170544.1	11562516	T	C	ENSAMXT00000019180	ENSAMXG00000018629	NA	CDS	SYNONYMOUS	P	P	579	1	3.02	299	novel	TOLERATED
NW_019170544.1	11562524	TA	T	ENSAMXT00000019180	ENSAMXG00000018629	NA	CDS	FRAMESHIFT DELETION	NA	NA	NA	NA	NA	NA	NA	NA
NW_019170544.1	11562537	C	T	ENSAMXT00000019180	ENSAMXG00000018629	NA	CDS	SYNONYMOUS	P	P	572	1	3.02	295	novel	TOLERATED
NW_019170544.1	11562540	A	C	ENSAMXT00000019180	ENSAMXG00000018629	NA	CDS	SYNONYMOUS	T	T	571	0.08	3.02	294	novel	TOLERATED
NW_019170544.1	11562549	G	A	ENSAMXT00000019180	ENSAMXG00000018629	NA	CDS	SYNONYMOUS	I	I	568	0.42	3.03	289	novel	TOLERATED
NW_019170544.1	11562557	G	A	ENSAMXT00000019180	ENSAMXG00000018629	NA	CDS	SYNONYMOUS	L	L	566	1	3.04	288	novel	TOLERATED
NW_019170544.1	11564227	G	A	ENSAMXT00000019180	ENSAMXG00000018629	NA	CDS	SYNONYMOUS	L	L	562	0.77	3.05	280	novel	TOLERATED
NW_019170544.1	11564235	C	A	ENSAMXT00000019180	ENSAMXG00000018629	NA	CDS	NONSYNONYMOUS	V	F	560	0.7	3.05	277	novel	TOLERATED
NW_019170544.1	11564263	G	A	ENSAMXT00000019180	ENSAMXG00000018629	NA	CDS	SYNONYMOUS	I	I	550	0.43	3.03	282	novel	TOLERATED
NW_019170544.1	11564275	C	T	ENSAMXT00000019180	ENSAMXG00000018629	NA	CDS	SYNONYMOUS	K	K	546	1	3.02	287	novel	TOLERATED
NW_019170544.1	11564296	A	T	ENSAMXT00000019180	ENSAMXG00000018629	NA	CDS	SYNONYMOUS	L	L	539	1	3.03	292	novel	TOLERATED
NW_019170544.1	11564302	C	T	ENSAMXT00000019180	ENSAMXG00000018629	NA	CDS	SYNONYMOUS	R	R	537	0.13	3.04	292	novel	TOLERATED
NW_019170544.1	11564308	T	C	ENSAMXT00000019180	ENSAMXG00000018629	NA	CDS	SYNONYMOUS	L	L	535	1	3.05	287	novel	TOLERATED
NW_019170544.1	11564325	A	G	ENSAMXT00000019180	ENSAMXG00000018629	NA	CDS	NONSYNONYMOUS	C	R	530	0.56	3.04	287	novel	TOLERATED
NW_019170544.1	11564340	T	A	ENSAMXT00000019180	ENSAMXG00000018629	NA	CDS	NONSYNONYMOUS	S	C	525	0.05	3.03	288	novel	TOLERATED
NW_019170544.1	11564374	C	G	ENSAMXT00000019180	ENSAMXG00000018629	NA	CDS	SYNONYMOUS	R	R	513	1	3.03	286	novel	TOLERATED
NW_019170544.1	11564388	T	A	ENSAMXT00000019180	ENSAMXG00000018629	NA	CDS	NONSYNONYMOUS	T	S	509	0.05	3.03	282	novel	TOLERATED
NW_019170544.1	11564514	C	T	ENSAMXT00000019180	ENSAMXG00000018629	NA	CDS	NONSYNONYMOUS	R	K	504	0.23	3.04	281	novel	TOLERATED
NW_019170544.1	11564521	C	T	ENSAMXT00000019180	ENSAMXG00000018629	NA	CDS	NONSYNONYMOUS	A	T	502	0.47	3.04	288	novel	TOLERATED
NW_019170544.1	11564525	T	C	ENSAMXT00000019180	ENSAMXG00000018629	NA	CDS	SYNONYMOUS	T	T	500	0.11	3.04	290	novel	TOLERATED
NW_019170544.1	11564546	G	T	ENSAMXT00000019180	ENSAMXG00000018629	NA	CDS	SYNONYMOUS	R	R	493	1	3.02	299	novel	TOLERATED
NW_019170544.1	11564555	G	A	ENSAMXT00000019180	ENSAMXG00000018629	NA	CDS	SYNONYMOUS	A	A	490	1	3.02	298	novel	TOLERATED
NW_019170544.1	11564561	A	T	ENSAMXT00000019180	ENSAMXG00000018629	NA	CDS	SYNONYMOUS	T	T	488	0.04	3.02	298	novel	DELETERIOUS
NW_019170544.1	11564563	T	C	ENSAMXT00000019180	ENSAMXG00000018629	NA	CDS	NONSYNONYMOUS	T	A	488	0.04	3.02	298	novel	DELETERIOUS
NW_019170544.1	11564565	T	G	ENSAMXT00000019180	ENSAMXG00000018629	NA	CDS	NONSYNONYMOUS	K	T	487	0.02	3.02	297	novel	DELETERIOUS
NW_019170544.1	11564567	C	T	ENSAMXT00000019180	ENSAMXG00000018629	NA	CDS	SYNONYMOUS	R	R	486	1	3.01	296	novel	TOLERATED
NW_019170544.1	11564585	T	C	ENSAMXT00000019180	ENSAMXG00000018629	NA	CDS	SYNONYMOUS	L	L	480	1	3.03	297	novel	TOLERATED
NW_019170544.1	11564594	A	G	ENSAMXT00000019180	ENSAMXG00000018629	NA	CDS	SYNONYMOUS	H	H	477	1	3.04	296	novel	TOLERATED
NW_019170544.1	11564720	C	CT	ENSAMXT00000019180	ENSAMXG00000018629	NA	CDS	FRAMESHIFT INSERTION	NA	NA	NA	NA	NA	NA	NA	NA
NW_019170544.1	11564722	G	C	ENSAMXT00000019180	ENSAMXG00000018629	NA	CDS	NONSYNONYMOUS	Q	E	464	0	3.01	301	novel	DELETERIOUS
NW_019170544.1	11564724	T	TATAA	ENSAMXT00000019180	ENSAMXG00000018629	NA	CDS	FRAMESHIFT INSERTION	NA	NA	NA	NA	NA	NA	NA	NA
NW_019170544.1	11564726	T	C	ENSAMXT00000019180	ENSAMXG00000018629	NA	CDS	SYNONYMOUS	E	E	462	0.17	3.01	300	novel	TOLERATED
NW_019170544.1	11564728	CAG	C	ENSAMXT00000019180	ENSAMXG00000018629	NA	CDS	FRAMESHIFT DELETION	NA	NA	NA	NA	NA	NA	NA	NA
NW_019170544.1	11564732	T	TATAA	ENSAMXT00000019180	ENSAMXG00000018629	NA	CDS	FRAMESHIFT INSERTION	NA	NA	NA	NA	NA	NA	NA	NA
NW_019170544.1	11564733	T	C	ENSAMXT00000019180	ENSAMXG00000018629	NA	CDS	NONSYNONYMOUS	Q	R	460	0.07	3.01	300	novel	TOLERATED
NW_019170544.1	11564734	G	C	ENSAMXT00000019180	ENSAMXG00000018629	NA	CDS	NONSYNONYMOUS	Q	E	460	1	3.01	300	novel	TOLERATED
NW_019170544.1	11564735	T	C	ENSAMXT00000019180	ENSAMXG00000018629	NA	CDS	SYNONYMOUS	R	R	459	1	3.01	300	novel	TOLERATED
NW_019170544.1	11564744	A	T	ENSAMXT00000019180	ENSAMXG00000018629	NA	CDS	SYNONYMOUS	L	L	456	1	3.01	300	novel	TOLERATED
NW_019170544.1	11564781	C	T	ENSAMXT00000019180	ENSAMXG00000018629	NA	CDS	NONSYNONYMOUS	S	N	444	1	3.01	301	novel	TOLERATED
NW_019170544.1	11565119	G	A	ENSAMXT00000019180	ENSAMXG00000018629	NA	CDS	NONSYNONYMOUS	A	V	435	0.07	3.01	293	novel	TOLERATED
NW_019170544.1	11565119	G	T	ENSAMXT00000019180	ENSAMXG00000018629	NA	CDS	NONSYNONYMOUS	A	D	435	0	3.01	293	novel	DELETERIOUS
NW_019170544.1	11565179	T	C	ENSAMXT00000019180	ENSAMXG00000018629	NA	CDS	NONSYNONYMOUS	K	R	415	0.2	3.01	293	novel	TOLERATED
NW_019170544.1	11565182	T	C	ENSAMXT00000019180	ENSAMXG00000018629	NA	CDS	NONSYNONYMOUS	K	R	414	1	3.04	293	novel	TOLERATED
NW_019170544.1	11565187	CTGTG	C	ENSAMXT00000019180	ENSAMXG00000018629	NA	CDS	FRAMESHIFT DELETION	NA	NA	NA	NA	NA	NA	NA	NA
NW_019170544.1	11565187	CTGTG	TTGTG	ENSAMXT00000019180	ENSAMXG00000018629	NA	CDS	SUBSTITUTION	NA	NA	NA	NA	NA	NA	NA	NA
NW_019170544.1	11565188	T	C	ENSAMXT00000019180	ENSAMXG00000018629	NA	CDS	NONSYNONYMOUS	Q	R	412	0.86	3.04	293	novel	TOLERATED
NW_019170544.1	11565191	G	GCTCA	ENSAMXT00000019180	ENSAMXG00000018629	NA	CDS	FRAMESHIFT INSERTION	NA	NA	NA	NA	NA	NA	NA	NA
NW_019170544.1	11565219	C	CGG	ENSAMXT00000019180	ENSAMXG00000018629	NA	CDS	FRAMESHIFT INSERTION	NA	NA	NA	NA	NA	NA	NA	NA
NW_019170544.1	11565221	GCA	G	ENSAMXT00000019180	ENSAMXG00000018629	NA	CDS	FRAMESHIFT DELETION	NA	NA	NA	NA	NA	NA	NA	NA
NW_019170544.1	11565226	A	G	ENSAMXT00000019180	ENSAMXG00000018629	NA	CDS	SYNONYMOUS	H	H	399	1	3.04	291	novel	TOLERATED
NW_019170544.1	11565661	C	T	ENSAMXT00000019180	ENSAMXG00000018629	NA	CDS	NONSYNONYMOUS	R	K	384	0.16	3.04	288	novel	TOLERATED
NW_019170544.1	11565671	A	T	ENSAMXT00000019180	ENSAMXG00000018629	NA	CDS	NONSYNONYMOUS	C	S	381	0.27	3.04	296	novel	TOLERATED
NW_019170544.1	11565672	C	G	ENSAMXT00000019180	ENSAMXG00000018629	NA	CDS	NONSYNONYMOUS	E	D	380	0.54	3.04	295	novel	TOLERATED
NW_019170544.1	11565682	G	A	ENSAMXT00000019180	ENSAMXG00000018629	NA	CDS	NONSYNONYMOUS	A	V	377	0.26	3.04	293	novel	TOLERATED
NW_019170544.1	11565687	G	T	ENSAMXT00000019180	ENSAMXG00000018629	NA	CDS	SYNONYMOUS	P	P	375	1	3.03	293	novel	TOLERATED
NW_019170544.1	11565702	A	G	ENSAMXT00000019180	ENSAMXG00000018629	NA	CDS	SYNONYMOUS	T	T	370	0.07	3.04	292	novel	TOLERATED
NW_019170544.1	11565704	T	C	ENSAMXT00000019180	ENSAMXG00000018629	NA	CDS	NONSYNONYMOUS	T	A	370	0.07	3.04	292	novel	TOLERATED
NW_019170544.1	11565707	C	A	ENSAMXT00000019180	ENSAMXG00000018629	NA	CDS	NONSYNONYMOUS	V	F	369	0.04	3.04	292	novel	DELETERIOUS
NW_019170544.1	11565720	C	A	ENSAMXT00000019180	ENSAMXG00000018629	NA	CDS	SYNONYMOUS	T	T	364	0.85	3.04	295	novel	TOLERATED
NW_019170544.1	11565720	C	T	ENSAMXT00000019180	ENSAMXG00000018629	NA	CDS	SYNONYMOUS	T	T	364	0.85	3.04	295	novel	TOLERATED
NW_019170544.1	11565744	T	A	ENSAMXT00000019180	ENSAMXG00000018629	NA	CDS	SYNONYMOUS	I	I	356	1	3.04	295	novel	TOLERATED
NW_019170544.1	11565752	C	T	ENSAMXT00000019180	ENSAMXG00000018629	NA	CDS	NONSYNONYMOUS	D	N	354	0.02	3.04	293	novel	DELETERIOUS
NW_019170544.1	11565756	T	C	ENSAMXT00000019180	ENSAMXG00000018629	NA	CDS	SYNONYMOUS	T	T	352	1	3.04	294	novel	TOLERATED
NW_019170544.1	11565758	T	G	ENSAMXT00000019180	ENSAMXG00000018629	NA	CDS	NONSYNONYMOUS	T	P	352	0	3.04	294	novel	DELETERIOUS
NW_019170544.1	11567039	A	G	ENSAMXT00000019180	ENSAMXG00000018629	NA	CDS	SYNONYMOUS	F	F	345	1	3.05	296	novel	TOLERATED
NW_019170544.1	11567045	G	T	ENSAMXT00000019180	ENSAMXG00000018629	NA	CDS	NONSYNONYMOUS	S	R	343	0.09	3.05	295	novel	TOLERATED
NW_019170544.1	11567054	G	A	ENSAMXT00000019180	ENSAMXG00000018629	NA	CDS	SYNONYMOUS	C	C	340	1	3.05	295	novel	TOLERATED
NW_019170544.1	11567147	G	A	ENSAMXT00000019180	ENSAMXG00000018629	NA	CDS	SYNONYMOUS	I	I	309	0.27	3.02	292	novel	TOLERATED
NW_019170544.1	11567155	G	A	ENSAMXT00000019180	ENSAMXG00000018629	NA	CDS	SYNONYMOUS	L	L	307	1	3.04	291	novel	TOLERATED
NW_019170544.1	11567182	G	A	ENSAMXT00000019180	ENSAMXG00000018629	NA	CDS	SYNONYMOUS	L	L	298	1	3.05	291	novel	TOLERATED
NW_019170544.1	11567231	A	G	ENSAMXT00000019180	ENSAMXG00000018629	NA	CDS	SYNONYMOUS	S	S	281	0.2	3.02	293	novel	TOLERATED
NW_019170544.1	11568060	A	G	ENSAMXT00000019180	ENSAMXG00000018629	NA	CDS	NONSYNONYMOUS	F	L	267	0.63	3.05	292	novel	TOLERATED
NW_019170544.1	11568064	G	A	ENSAMXT00000019180	ENSAMXG00000018629	NA	CDS	SYNONYMOUS	L	L	265	1	3.05	293	novel	TOLERATED
NW_019170544.1	11568076	T	C	ENSAMXT00000019180	ENSAMXG00000018629	NA	CDS	SYNONYMOUS	L	L	261	1	3.05	292	novel	TOLERATED
NW_019170544.1	11568078	G	A	ENSAMXT00000019180	ENSAMXG00000018629	NA	CDS	SYNONYMOUS	L	L	261	1	3.05	292	novel	TOLERATED
NW_019170544.1	11568078	G	T	ENSAMXT00000019180	ENSAMXG00000018629	NA	CDS	NONSYNONYMOUS	L	I	261	0.16	3.05	292	novel	TOLERATED
NW_019170544.1	11568091	G	A	ENSAMXT00000019180	ENSAMXG00000018629	NA	CDS	SYNONYMOUS	R	R	256	0.28	3.05	294	novel	TOLERATED
NW_019170544.1	11568094	G	A	ENSAMXT00000019180	ENSAMXG00000018629	NA	CDS	SYNONYMOUS	D	D	255	1	3.05	294	novel	TOLERATED
NW_019170544.1	11568112	T	C	ENSAMXT00000019180	ENSAMXG00000018629	NA	CDS	SYNONYMOUS	P	P	249	1	3.04	294	novel	TOLERATED
NW_019170544.1	11568121	G	A	ENSAMXT00000019180	ENSAMXG00000018629	NA	CDS	SYNONYMOUS	I	I	246	1	3.04	294	novel	TOLERATED
NW_019170544.1	11568362	CAG	C	ENSAMXT00000019180	ENSAMXG00000018629	NA	CDS	FRAMESHIFT DELETION	NA	NA	NA	NA	NA	NA	NA	NA
NW_019170544.1	11568366	GATCCCGGGGGAGGAAT	G	ENSAMXT00000019180	ENSAMXG00000018629	NA	CDS	FRAMESHIFT DELETION	NA	NA	NA	NA	NA	NA	NA	NA
NW_019170544.1	11568367	A	G	ENSAMXT00000019180	ENSAMXG00000018629	NA	CDS	NONSYNONYMOUS	S	P	234	0.82	3.03	280	novel	TOLERATED
NW_019170544.1	11568371	C	A	ENSAMXT00000019180	ENSAMXG00000018629	NA	CDS	SYNONYMOUS	P	P	232	1	3.02	281	novel	TOLERATED
NW_019170544.1	11568371	C	T	ENSAMXT00000019180	ENSAMXG00000018629	NA	CDS	SYNONYMOUS	P	P	232	1	3.02	281	novel	TOLERATED
NW_019170544.1	11568371	C	G	ENSAMXT00000019180	ENSAMXG00000018629	NA	CDS	SYNONYMOUS	P	P	232	1	3.02	281	novel	TOLERATED
NW_019170544.1	11568382	T	C	ENSAMXT00000019180	ENSAMXG00000018629	NA	CDS	NONSYNONYMOUS	I	V	229	1	3.01	278	novel	TOLERATED
NW_019170544.1	11568383	G	T	ENSAMXT00000019180	ENSAMXG00000018629	NA	CDS	SYNONYMOUS	P	P	228	1	3.02	279	novel	TOLERATED
NW_019170544.1	11568395	C	T	ENSAMXT00000019180	ENSAMXG00000018629	NA	CDS	SYNONYMOUS	L	L	224	1	3.02	278	novel	TOLERATED
NW_019170544.1	11568397	GT	G	ENSAMXT00000019180	ENSAMXG00000018629	NA	CDS	FRAMESHIFT DELETION	NA	NA	NA	NA	NA	NA	NA	NA
NW_019170544.1	11568430	G	A	ENSAMXT00000019180	ENSAMXG00000018629	NA	CDS	SYNONYMOUS	L	L	213	0.38	3.02	276	novel	TOLERATED
NW_019170544.1	11568938	G	A	ENSAMXT00000019180	ENSAMXG00000018629	NA	CDS	SYNONYMOUS	L	L	198	1	3.03	294	novel	TOLERATED
NW_019170544.1	11568954	C	T	ENSAMXT00000019180	ENSAMXG00000018629	NA	CDS	SYNONYMOUS	T	T	192	0.42	3.03	294	novel	TOLERATED
NW_019170544.1	11568969	T	C	ENSAMXT00000019180	ENSAMXG00000018629	NA	CDS	SYNONYMOUS	K	K	187	1	3.03	294	novel	TOLERATED
NW_019170544.1	11568972	C	G	ENSAMXT00000019180	ENSAMXG00000018629	NA	CDS	SYNONYMOUS	S	S	186	1	3.04	293	novel	TOLERATED
NW_019170544.1	11568975	T	A	ENSAMXT00000019180	ENSAMXG00000018629	NA	CDS	SYNONYMOUS	I	I	185	1	3.04	293	novel	TOLERATED
NW_019170544.1	11569033	T	G	ENSAMXT00000019180	ENSAMXG00000018629	NA	CDS	NONSYNONYMOUS	Q	P	166	0.24	3.03	274	novel	TOLERATED
NW_019170544.1	11569042	G	A	ENSAMXT00000019180	ENSAMXG00000018629	NA	CDS	NONSYNONYMOUS	S	L	163	0.68	3.04	277	novel	TOLERATED
NW_019170544.1	11569044	T	G	ENSAMXT00000019180	ENSAMXG00000018629	NA	CDS	SYNONYMOUS	G	G	162	1	3.05	273	novel	TOLERATED
NW_019170544.1	11569047	G	A	ENSAMXT00000019180	ENSAMXG00000018629	NA	CDS	SYNONYMOUS	D	D	161	1	3.04	278	novel	TOLERATED
NW_019170544.1	11569292	C	G	ENSAMXT00000019180	ENSAMXG00000018629	NA	CDS	SYNONYMOUS	P	P	155	1	3.03	291	novel	TOLERATED
NW_019170544.1	11569293	G	T	ENSAMXT00000019180	ENSAMXG00000018629	NA	CDS	NONSYNONYMOUS	P	Q	155	0.02	3.03	291	novel	DELETERIOUS
NW_019170544.1	11569295	T	C	ENSAMXT00000019180	ENSAMXG00000018629	NA	CDS	SYNONYMOUS	R	R	154	1	3.02	297	novel	TOLERATED
NW_019170544.1	11569337	G	C	ENSAMXT00000019180	ENSAMXG00000018629	NA	CDS	SYNONYMOUS	V	V	140	1	3.03	302	novel	TOLERATED
NW_019170544.1	11569346	G	A	ENSAMXT00000019180	ENSAMXG00000018629	NA	CDS	SYNONYMOUS	F	F	137	1	3.02	301	novel	TOLERATED
NW_019170544.1	11569394	A	G	ENSAMXT00000019180	ENSAMXG00000018629	NA	CDS	SYNONYMOUS	L	L	121	1	3.03	295	novel	TOLERATED
NW_019170544.1	11569397	C	T	ENSAMXT00000019180	ENSAMXG00000018629	NA	CDS	SYNONYMOUS	G	G	120	1	3.03	293	novel	TOLERATED
NW_019170544.1	11569711	A	G	ENSAMXT00000019180	ENSAMXG00000018629	NA	CDS	NONSYNONYMOUS	L	P	115	0	3.02	293	novel	DELETERIOUS
NW_019170544.1	11569722	A	C	ENSAMXT00000019180	ENSAMXG00000018629	NA	CDS	SYNONYMOUS	A	A	111	1	3.02	291	novel	TOLERATED
NW_019170544.1	11569726	A	G	ENSAMXT00000019180	ENSAMXG00000018629	NA	CDS	NONSYNONYMOUS	V	A	110	0.05	3.02	290	novel	TOLERATED
NW_019170544.1	11569728	A	C	ENSAMXT00000019180	ENSAMXG00000018629	NA	CDS	SYNONYMOUS	L	L	109	1	3.01	290	novel	TOLERATED
NW_019170544.1	11569761	A	T	ENSAMXT00000019180	ENSAMXG00000018629	NA	CDS	SYNONYMOUS	T	T	98	1	3.02	280	novel	TOLERATED
NW_019170544.1	11569771	A	C	ENSAMXT00000019180	ENSAMXG00000018629	NA	CDS	NONSYNONYMOUS	V	G	95	0.41	3.02	240	novel	TOLERATED
NW_019170544.1	11569771	A	T	ENSAMXT00000019180	ENSAMXG00000018629	NA	CDS	NONSYNONYMOUS	V	E	95	1	3.02	240	novel	TOLERATED
NW_019170544.1	11569773	A	G	ENSAMXT00000019180	ENSAMXG00000018629	NA	CDS	SYNONYMOUS	S	S	94	0.68	3.02	232	novel	TOLERATED
NW_019170544.1	11569776	T	C	ENSAMXT00000019180	ENSAMXG00000018629	NA	CDS	SYNONYMOUS	T	T	93	0.73	3.02	252	novel	TOLERATED
NW_019170544.1	11569779	C	A	ENSAMXT00000019180	ENSAMXG00000018629	NA	CDS	NONSYNONYMOUS	R	S	92	0.62	3.02	262	novel	TOLERATED
NW_019170544.1	11569782	C	T	ENSAMXT00000019180	ENSAMXG00000018629	NA	CDS	SYNONYMOUS	A	A	91	0.95	3.02	274	novel	TOLERATED
NW_019170544.1	11569784	C	T	ENSAMXT00000019180	ENSAMXG00000018629	NA	CDS	NONSYNONYMOUS	A	T	91	0.19	3.02	274	novel	TOLERATED
NW_019170544.1	11569785	G	A	ENSAMXT00000019180	ENSAMXG00000018629	NA	CDS	SYNONYMOUS	N	N	90	1	3.02	278	novel	TOLERATED
NW_019170544.1	11569788	C	T	ENSAMXT00000019180	ENSAMXG00000018629	NA	CDS	SYNONYMOUS	G	G	89	1	3.02	279	novel	TOLERATED
NW_019170544.1	11569806	C	T	ENSAMXT00000019180	ENSAMXG00000018629	NA	CDS	SYNONYMOUS	R	R	83	1	3.01	277	novel	TOLERATED
NW_019170544.1	11569812	A	G	ENSAMXT00000019180	ENSAMXG00000018629	NA	CDS	SYNONYMOUS	H	H	81	0.08	3.03	270	novel	TOLERATED
NW_019170544.1	11569833	A	G	ENSAMXT00000019180	ENSAMXG00000018629	NA	CDS	SYNONYMOUS	R	R	74	1	3.02	276	novel	TOLERATED
NW_019170544.1	11569845	G	A	ENSAMXT00000019180	ENSAMXG00000018629	NA	CDS	SYNONYMOUS	V	V	70	0.7	3.04	251	novel	TOLERATED
NW_019170544.1	11569860	T	C	ENSAMXT00000019180	ENSAMXG00000018629	NA	CDS	SYNONYMOUS	G	G	65	1	3.03	256	novel	TOLERATED
NW_019170544.1	11569875	T	A	ENSAMXT00000019180	ENSAMXG00000018629	NA	CDS	SYNONYMOUS	A	A	60	0.71	3.02	264	novel	TOLERATED
NW_019170544.1	11569879	T	A	ENSAMXT00000019180	ENSAMXG00000018629	NA	CDS	NONSYNONYMOUS	H	L	59	0.45	3.06	254	novel	TOLERATED
NW_019170544.1	11569890	C	A	ENSAMXT00000019180	ENSAMXG00000018629	NA	CDS	NONSYNONYMOUS	M	I	55	0.01	3.03	268	novel	DELETERIOUS
NW_019170544.1	11569892	T	C	ENSAMXT00000019180	ENSAMXG00000018629	NA	CDS	NONSYNONYMOUS	M	V	55	0.04	3.03	268	novel	DELETERIOUS
NW_019170544.1	11569895	C	T	ENSAMXT00000019180	ENSAMXG00000018629	NA	CDS	NONSYNONYMOUS	V	M	54	0	3.03	268	novel	DELETERIOUS
NW_019170544.1	11569896	G	A	ENSAMXT00000019180	ENSAMXG00000018629	NA	CDS	SYNONYMOUS	F	F	53	1	3.02	271	novel	TOLERATED
NW_019170544.1	11569899	G	T	ENSAMXT00000019180	ENSAMXG00000018629	NA	CDS	SYNONYMOUS	P	P	52	1	3.02	271	novel	TOLERATED
NW_019170544.1	11569926	T	C	ENSAMXT00000019180	ENSAMXG00000018629	NA	CDS	SYNONYMOUS	P	P	43	1	3.04	268	novel	TOLERATED
NW_019170544.1	11569934	G	C	ENSAMXT00000019180	ENSAMXG00000018629	NA	CDS	NONSYNONYMOUS	L	V	41	0.06	3.03	266	novel	TOLERATED
NW_019170544.1	11569935	C	A	ENSAMXT00000019180	ENSAMXG00000018629	NA	CDS	NONSYNONYMOUS	M	I	40	0.2	3.03	250	novel	TOLERATED
NW_019170544.1	11569937	T	G	ENSAMXT00000019180	ENSAMXG00000018629	NA	CDS	NONSYNONYMOUS	M	L	40	1	3.03	250	novel	TOLERATED
NW_019170544.1	11569938	G	T	ENSAMXT00000019180	ENSAMXG00000018629	NA	CDS	SYNONYMOUS	P	P	39	1	3.04	247	novel	TOLERATED
NW_019170544.1	11569939	G	C	ENSAMXT00000019180	ENSAMXG00000018629	NA	CDS	NONSYNONYMOUS	P	R	39	0.08	3.04	247	novel	TOLERATED
NW_019170544.1	11569943	A	T	ENSAMXT00000019180	ENSAMXG00000018629	NA	CDS	NONSYNONYMOUS	F	I	38	0.24	3.07	226	novel	TOLERATED
NW_019170544.1	11570753	C	G	ENSAMXT00000019180	ENSAMXG00000018629	NA	CDS	SYNONYMOUS	V	V	26	1	3.08	220	novel	TOLERATED
NW_019170544.1	11570756	C	A	ENSAMXT00000019180	ENSAMXG00000018629	NA	CDS	NONSYNONYMOUS	E	D	25	0.56	3.09	219	novel	TOLERATED
NW_019170544.1	11570780	G	A	ENSAMXT00000019180	ENSAMXG00000018629	NA	CDS	SYNONYMOUS	G	G	17	1	3.08	219	novel	TOLERATED
NW_019170544.1	11570780	G	T	ENSAMXT00000019180	ENSAMXG00000018629	NA	CDS	SYNONYMOUS	G	G	17	1	3.08	219	novel	TOLERATED
NW_019170544.1	11570795	T	C	ENSAMXT00000019180	ENSAMXG00000018629	NA	CDS	SYNONYMOUS	A	A	12	1	3.09	213	novel	TOLERATED
NW_019170544.1	11570807	A	G	ENSAMXT00000019180	ENSAMXG00000018629	NA	CDS	SYNONYMOUS	G	G	8	1	3.11	208	novel	TOLERATED
NW_019170544.1	11570822	T	C	ENSAMXT00000019180	ENSAMXG00000018629	NA	CDS	SYNONYMOUS	E	E	3	0.68	3.14	144	novel	TOLERATED
NW_019170544.1	11570833	A	T	ENSAMXT00000019180	ENSAMXG00000018629	NA	UTR_5	NONCODING	NA	NA	NA	NA	NA	NA	novel	NA
NW_019170544.1	11570835	G	A	ENSAMXT00000019180	ENSAMXG00000018629	NA	UTR_5	NONCODING	NA	NA	NA	NA	NA	NA	novel	NA
NW_019170544.1	11570837	A	T	ENSAMXT00000019180	ENSAMXG00000018629	NA	UTR_5	NONCODING	NA	NA	NA	NA	NA	NA	novel	NA
NW_019170544.1	11570840	A	G	ENSAMXT00000019180	ENSAMXG00000018629	NA	UTR_5	NONCODING	NA	NA	NA	NA	NA	NA	novel	NA
NW_019170544.1	11570844	AATTTCTCCTCCACATAAG	A	ENSAMXT00000019180	ENSAMXG00000018629	NA	UTR_5	NONFRAMESHIFT DELETION	NA	NA	NA	NA	NA	NA	NA	NA
NW_019170544.1	11570847	T	G	ENSAMXT00000019180	ENSAMXG00000018629	NA	UTR_5	NONCODING	NA	NA	NA	NA	NA	NA	novel	NA
NW_019170544.1	11570849	C	A	ENSAMXT00000019180	ENSAMXG00000018629	NA	UTR_5	NONCODING	NA	NA	NA	NA	NA	NA	novel	NA
NW_019170544.1	11570852	C	T	ENSAMXT00000019180	ENSAMXG00000018629	NA	UTR_5	NONCODING	NA	NA	NA	NA	NA	NA	novel	NA
NW_019170544.1	11570856	A	C	ENSAMXT00000019180	ENSAMXG00000018629	NA	UTR_5	NONCODING	NA	NA	NA	NA	NA	NA	novel	NA
NW_019170544.1	11570856	A	T	ENSAMXT00000019180	ENSAMXG00000018629	NA	UTR_5	NONCODING	NA	NA	NA	NA	NA	NA	novel	NA
NW_019170544.1	11570859	T	C	ENSAMXT00000019180	ENSAMXG00000018629	NA	UTR_5	NONCODING	NA	NA	NA	NA	NA	NA	novel	NA
NW_019170544.1	11570882	C	G	ENSAMXT00000019180	ENSAMXG00000018629	NA	UTR_5	NONCODING	NA	NA	NA	NA	NA	NA	novel	NA
NW_019170544.1	11570894	C	T	ENSAMXT00000019180	ENSAMXG00000018629	NA	UTR_5	NONCODING	NA	NA	NA	NA	NA	NA	novel	NA
NW_019170544.1	11570900	G	A	ENSAMXT00000019180	ENSAMXG00000018629	NA	UTR_5	NONCODING	NA	NA	NA	NA	NA	NA	novel	NA
NW_019170544.1	11570902	A	C	ENSAMXT00000019180	ENSAMXG00000018629	NA	UTR_5	NONCODING	NA	NA	NA	NA	NA	NA	novel	NA
NW_019170544.1	11570909	A	T	ENSAMXT00000019180	ENSAMXG00000018629	NA	UTR_5	NONCODING	NA	NA	NA	NA	NA	NA	novel	NA
NW_019170544.1	11570925	T	A	ENSAMXT00000019180	ENSAMXG00000018629	NA	UTR_5	NONCODING	NA	NA	NA	NA	NA	NA	novel	NA
NW_019170544.1	11570928	G	T	ENSAMXT00000019180	ENSAMXG00000018629	NA	UTR_5	NONCODING	NA	NA	NA	NA	NA	NA	novel	NA
NW_019170544.1	11570929	C	T	ENSAMXT00000019180	ENSAMXG00000018629	NA	UTR_5	NONCODING	NA	NA	NA	NA	NA	NA	novel	NA
NW_019170544.1	11570930	T	TGAA	ENSAMXT00000019180	ENSAMXG00000018629	NA	UTR_5	NONFRAMESHIFT INSERTION	NA	NA	NA	NA	NA	NA	NA	NA
NW_019170544.1	11570935	C	CAGTT	ENSAMXT00000019180	ENSAMXG00000018629	NA	UTR_5	FRAMESHIFT INSERTION	NA	NA	NA	NA	NA	NA	NA	NA
NW_019170544.1	11570940	C	A	ENSAMXT00000019180	ENSAMXG00000018629	NA	UTR_5	NONCODING	NA	NA	NA	NA	NA	NA	novel	NA
NW_019170544.1	11574116	G	A	ENSAMXT00000019180	ENSAMXG00000018629	NA	UTR_5	NONCODING	NA	NA	NA	NA	NA	NA	novel	NA
NW_019170544.1	11574142	AGTCT	A	ENSAMXT00000019180	ENSAMXG00000018629	NA	UTR_5	FRAMESHIFT DELETION	NA	NA	NA	NA	NA	NA	NA	NA
NW_019170544.1	11574144	T	G	ENSAMXT00000019180	ENSAMXG00000018629	NA	UTR_5	NONCODING	NA	NA	NA	NA	NA	NA	novel	NA
NW_019170544.1	11574151	G	C	ENSAMXT00000019180	ENSAMXG00000018629	NA	UTR_5	NONCODING	NA	NA	NA	NA	NA	NA	novel	NA
NW_019170544.1	11574177	G	A	ENSAMXT00000019180	ENSAMXG00000018629	NA	UTR_5	NONCODING	NA	NA	NA	NA	NA	NA	novel	NA
NW_019170544.1	11574180	C	T	ENSAMXT00000019180	ENSAMXG00000018629	NA	UTR_5	NONCODING	NA	NA	NA	NA	NA	NA	novel	NA
NW_019170544.1	11574188	CCAGCAG	C	ENSAMXT00000019180	ENSAMXG00000018629	NA	UTR_5	NONFRAMESHIFT DELETION	NA	NA	NA	NA	NA	NA	NA	NA
NW_019170544.1	11574191	G	GCTGCACAGGAAAAGCAGCAC	ENSAMXT00000019180	ENSAMXG00000018629	NA	UTR_5	FRAMESHIFT INSERTION	NA	NA	NA	NA	NA	NA	NA	NA
NW_019170544.1	11574228	C	T	ENSAMXT00000019180	ENSAMXG00000018629	NA	UTR_5	NONCODING	NA	NA	NA	NA	NA	NA	novel	NA
NW_019170544.1	11574238	G	T	ENSAMXT00000019180	ENSAMXG00000018629	NA	UTR_5	NONCODING	NA	NA	NA	NA	NA	NA	novel	NA
NW_019170544.1	12024504	A	C	ENSAMXT00000033776	ENSAMXG00000038707	ndrg1b	UTR_5	NONCODING	NA	NA	NA	NA	NA	NA	novel	NA
NW_019170544.1	12024506	C	A	ENSAMXT00000033776	ENSAMXG00000038707	ndrg1b	UTR_5	NONCODING	NA	NA	NA	NA	NA	NA	novel	NA
NW_019170544.1	12024510	C	T	ENSAMXT00000033776	ENSAMXG00000038707	ndrg1b	UTR_5	NONCODING	NA	NA	NA	NA	NA	NA	novel	NA
NW_019170544.1	12024516	C	T	ENSAMXT00000033776	ENSAMXG00000038707	ndrg1b	UTR_5	NONCODING	NA	NA	NA	NA	NA	NA	novel	NA
NW_019170544.1	12024570	G	A	ENSAMXT00000033776	ENSAMXG00000038707	ndrg1b	UTR_5	NONCODING	NA	NA	NA	NA	NA	NA	novel	NA
NW_019170544.1	12024607	C	T	ENSAMXT00000033776	ENSAMXG00000038707	ndrg1b	UTR_5	NONCODING	NA	NA	NA	NA	NA	NA	novel	NA
NW_019170544.1	12024608	A	G	ENSAMXT00000033776	ENSAMXG00000038707	ndrg1b	UTR_5	NONCODING	NA	NA	NA	NA	NA	NA	novel	NA
NW_019170544.1	12024609	G	T	ENSAMXT00000033776	ENSAMXG00000038707	ndrg1b	UTR_5	NONCODING	NA	NA	NA	NA	NA	NA	novel	NA
NW_019170544.1	12024632	G	A	ENSAMXT00000033776	ENSAMXG00000038707	ndrg1b	UTR_5	NONCODING	NA	NA	NA	NA	NA	NA	novel	NA
NW_019170544.1	12024635	C	A	ENSAMXT00000033776	ENSAMXG00000038707	ndrg1b	UTR_5	NONCODING	NA	NA	NA	NA	NA	NA	novel	NA
NW_019170544.1	12024638	C	A	ENSAMXT00000033776	ENSAMXG00000038707	ndrg1b	UTR_5	NONCODING	NA	NA	NA	NA	NA	NA	novel	NA
NW_019170544.1	12024669	C	T	ENSAMXT00000033776	ENSAMXG00000038707	ndrg1b	UTR_5	NONCODING	NA	NA	NA	NA	NA	NA	novel	NA
NW_019170544.1	12024680	A	T	ENSAMXT00000033776	ENSAMXG00000038707	ndrg1b	UTR_5	NONCODING	NA	NA	NA	NA	NA	NA	novel	NA
NW_019170544.1	12024701	G	C	ENSAMXT00000033776	ENSAMXG00000038707	ndrg1b	UTR_5	NONCODING	NA	NA	NA	NA	NA	NA	novel	NA
NW_019170544.1	12024711	G	A	ENSAMXT00000033776	ENSAMXG00000038707	ndrg1b	UTR_5	NONCODING	NA	NA	NA	NA	NA	NA	novel	NA
NW_019170544.1	12024721	A	G	ENSAMXT00000033776	ENSAMXG00000038707	ndrg1b	UTR_5	NONCODING	NA	NA	NA	NA	NA	NA	novel	NA
NW_019170544.1	12024724	G	A	ENSAMXT00000033776	ENSAMXG00000038707	ndrg1b	UTR_5	NONCODING	NA	NA	NA	NA	NA	NA	novel	NA
NW_019170544.1	12024738	GGA	G	ENSAMXT00000033776	ENSAMXG00000038707	ndrg1b	UTR_5	FRAMESHIFT DELETION	NA	NA	NA	NA	NA	NA	NA	NA
NW_019170544.1	12024768	A	T	ENSAMXT00000033776	ENSAMXG00000038707	ndrg1b	UTR_5	NONCODING	NA	NA	NA	NA	NA	NA	novel	NA
NW_019170544.1	12024771	G	C	ENSAMXT00000033776	ENSAMXG00000038707	ndrg1b	UTR_5	NONCODING	NA	NA	NA	NA	NA	NA	novel	NA
NW_019170544.1	12024775	CTT	C	ENSAMXT00000033776	ENSAMXG00000038707	ndrg1b	UTR_5	FRAMESHIFT DELETION	NA	NA	NA	NA	NA	NA	NA	NA
NW_019170544.1	12024778	C	CCA	ENSAMXT00000033776	ENSAMXG00000038707	ndrg1b	UTR_5	FRAMESHIFT INSERTION	NA	NA	NA	NA	NA	NA	NA	NA
NW_019170544.1	12024796	T	C	ENSAMXT00000033776	ENSAMXG00000038707	ndrg1b	UTR_5	NONCODING	NA	NA	NA	NA	NA	NA	novel	NA
NW_019170544.1	12024802	C	A	ENSAMXT00000033776	ENSAMXG00000038707	ndrg1b	UTR_5	NONCODING	NA	NA	NA	NA	NA	NA	novel	NA
NW_019170544.1	12024814	A	G	ENSAMXT00000033776	ENSAMXG00000038707	ndrg1b	UTR_5	NONCODING	NA	NA	NA	NA	NA	NA	novel	NA
NW_019170544.1	12024830	C	A	ENSAMXT00000033776	ENSAMXG00000038707	ndrg1b	CDS	NONSYNONYMOUS	D	E	5	0.43	3.2	103	novel	TOLERATED
NW_019170544.1	12024836	G	A	ENSAMXT00000033776	ENSAMXG00000038707	ndrg1b	CDS	SYNONYMOUS	E	E	7	1	3.21	104	novel	TOLERATED
NW_019170544.1	12024856	C	A	ENSAMXT00000046835	ENSAMXG00000038707	ndrg1b	CDS	NONSYNONYMOUS	T	N	14	0.49	3.11	183	novel	TOLERATED
NW_019170544.1	12025808	T	A	ENSAMXT00000033776	ENSAMXG00000038707	ndrg1b	CDS	NONSYNONYMOUS	I	N	20	0.09	3.17	372	novel	TOLERATED
NW_019170544.1	12025808	T	G	ENSAMXT00000033776	ENSAMXG00000038707	ndrg1b	CDS	NONSYNONYMOUS	I	S	20	0	3.17	372	novel	DELETERIOUS
NW_019170544.1	12025809	T	A	ENSAMXT00000046835	ENSAMXG00000038707	ndrg1b	CDS	SYNONYMOUS	I	I	20	0.02	3.09	374	novel	DELETERIOUS
NW_019170544.1	12025812	T	G	ENSAMXT00000033776	ENSAMXG00000038707	ndrg1b	CDS	SYNONYMOUS	V	V	21	1	3.16	384	novel	TOLERATED
NW_019170544.1	12025827	G	A	ENSAMXT00000033776	ENSAMXG00000038707	ndrg1b	CDS	SYNONYMOUS	G	G	26	1	3.16	387	novel	TOLERATED
NW_019170544.1	12025858	C	A	ENSAMXT00000033776	ENSAMXG00000038707	ndrg1b	CDS	SYNONYMOUS	R	R	37	0.24	3.16	397	novel	TOLERATED
NW_019170544.1	12025872	C	A	ENSAMXT00000033776	ENSAMXG00000038707	ndrg1b	CDS	SYNONYMOUS	P	P	41	1	3.16	397	novel	TOLERATED
NW_019170544.1	12025872	C	T	ENSAMXT00000033776	ENSAMXG00000038707	ndrg1b	CDS	SYNONYMOUS	P	P	41	1	3.16	397	novel	TOLERATED
NW_019170544.1	12025890	C	T	ENSAMXT00000033776	ENSAMXG00000038707	ndrg1b	CDS	SYNONYMOUS	H	H	47	1	3.16	397	novel	TOLERATED
NW_019170544.1	12025899	A	C	ENSAMXT00000033776	ENSAMXG00000038707	ndrg1b	CDS	SYNONYMOUS	G	G	50	1	3.16	397	novel	TOLERATED
NW_019170544.1	12026206	C	G	ENSAMXT00000046835	ENSAMXG00000038707	ndrg1b	CDS	NONSYNONYMOUS	T	S	59	0.4	3.08	399	novel	TOLERATED
NW_019170544.1	12026209	T	A	ENSAMXT00000033776	ENSAMXG00000038707	ndrg1b	CDS	NONSYNONYMOUS	L	H	60	0	3.16	400	novel	DELETERIOUS
NW_019170544.1	12026222	G	A	ENSAMXT00000033776	ENSAMXG00000038707	ndrg1b	CDS	SYNONYMOUS	E	E	64	1	3.16	400	novel	TOLERATED
NW_019170544.1	12026240	G	A	ENSAMXT00000033776	ENSAMXG00000038707	ndrg1b	CDS	SYNONYMOUS	T	T	70	1	3.16	400	novel	TOLERATED
NW_019170544.1	12026261	C	T	ENSAMXT00000033776	ENSAMXG00000038707	ndrg1b	CDS	SYNONYMOUS	H	H	77	1	3.16	399	novel	TOLERATED
NW_019170544.1	12026267	C	T	ENSAMXT00000046835	ENSAMXG00000038707	ndrg1b	CDS	SYNONYMOUS	N	N	79	0.08	3.08	398	novel	TOLERATED
NW_019170544.1	12026273	T	G	ENSAMXT00000033776	ENSAMXG00000038707	ndrg1b	CDS	SYNONYMOUS	P	P	81	1	3.16	399	novel	TOLERATED
NW_019170544.1	12026276	A	G	ENSAMXT00000033776	ENSAMXG00000038707	ndrg1b	CDS	SYNONYMOUS	G	G	82	1	3.16	399	novel	TOLERATED
NW_019170544.1	12026303	T	C	ENSAMXT00000033776	ENSAMXG00000038707	ndrg1b	CDS	SYNONYMOUS	P	P	91	1	3.16	399	novel	TOLERATED
NW_019170544.1	12026935	A	T	ENSAMXT00000033776	ENSAMXG00000038707	ndrg1b	CDS	SYNONYMOUS	S	S	98	1	3.16	397	novel	TOLERATED
NW_019170544.1	12026947	C	T	ENSAMXT00000033776	ENSAMXG00000038707	ndrg1b	CDS	SYNONYMOUS	L	L	102	1	3.16	396	novel	TOLERATED
NW_019170544.1	12026956	C	G	ENSAMXT00000046835	ENSAMXG00000038707	ndrg1b	CDS	SYNONYMOUS	T	T	105	0.54	3.09	396	novel	TOLERATED
NW_019170544.1	12026957	C	T	ENSAMXT00000033776	ENSAMXG00000038707	ndrg1b	CDS	SYNONYMOUS	L	L	106	1	3.16	396	novel	TOLERATED
NW_019170544.1	12027106	T	A	ENSAMXT00000046835	ENSAMXG00000038707	ndrg1b	CDS	SYNONYMOUS	I	I	115	0.22	3.09	396	novel	TOLERATED
NW_019170544.1	12027108	C	T	ENSAMXT00000033776	ENSAMXG00000038707	ndrg1b	CDS	NONSYNONYMOUS	T	M	116	0	3.15	396	novel	DELETERIOUS
NW_019170544.1	12027109	G	A	ENSAMXT00000046835	ENSAMXG00000038707	ndrg1b	CDS	SYNONYMOUS	T	T	116	0.04	3.08	395	novel	DELETERIOUS
NW_019170544.1	12027145	C	T	ENSAMXT00000033776	ENSAMXG00000038707	ndrg1b	CDS	SYNONYMOUS	Y	Y	128	1	3.16	396	novel	TOLERATED
NW_019170544.1	12027151	C	T	ENSAMXT00000033776	ENSAMXG00000038707	ndrg1b	CDS	SYNONYMOUS	L	L	130	1	3.16	396	novel	TOLERATED
NW_019170544.1	12028107	T	C	ENSAMXT00000033776	ENSAMXG00000038707	ndrg1b	CDS	SYNONYMOUS	N	N	136	1	3.16	399	novel	TOLERATED
NW_019170544.1	12028128	T	C	ENSAMXT00000033776	ENSAMXG00000038707	ndrg1b	CDS	SYNONYMOUS	G	G	143	1	3.16	399	novel	TOLERATED
NW_019170544.1	12028134	T	C	ENSAMXT00000033776	ENSAMXG00000038707	ndrg1b	CDS	SYNONYMOUS	V	V	145	1	3.16	399	novel	TOLERATED
NW_019170544.1	12028149	C	T	ENSAMXT00000033776	ENSAMXG00000038707	ndrg1b	CDS	SYNONYMOUS	N	N	150	1	3.16	398	novel	TOLERATED
NW_019170544.1	12028151	C	T	ENSAMXT00000033776	ENSAMXG00000038707	ndrg1b	CDS	NONSYNONYMOUS	A	V	151	0.03	3.16	397	novel	DELETERIOUS
NW_019170544.1	12028164	G	C	ENSAMXT00000033776	ENSAMXG00000038707	ndrg1b	CDS	SYNONYMOUS	G	G	155	1	3.16	397	novel	TOLERATED
NW_019170544.1	12028183	C	A	ENSAMXT00000033776	ENSAMXG00000038707	ndrg1b	CDS	NONSYNONYMOUS	H	N	162	0.46	3.18	395	novel	TOLERATED
NW_019170544.1	12028577	C	A	ENSAMXT00000033776	ENSAMXG00000038707	ndrg1b	CDS	NONSYNONYMOUS	L	I	164	1	3.17	393	novel	TOLERATED
NW_019170544.1	12028582	G	T	ENSAMXT00000033776	ENSAMXG00000038707	ndrg1b	CDS	SYNONYMOUS	S	S	165	1	3.17	392	novel	TOLERATED
NW_019170544.1	12028599	C	T	ENSAMXT00000033776	ENSAMXG00000038707	ndrg1b	CDS	NONSYNONYMOUS	S	L	171	1	3.15	384	novel	TOLERATED
NW_019170544.1	12028600	G	A	ENSAMXT00000046835	ENSAMXG00000038707	ndrg1b	CDS	SYNONYMOUS	S	S	171	0.02	3.11	384	novel	DELETERIOUS
NW_019170544.1	12028609	T	G	ENSAMXT00000046835	ENSAMXG00000038707	ndrg1b	CDS	NONSYNONYMOUS	I	M	174	0.89	3.08	392	novel	TOLERATED
NW_019170544.1	12028628	G	A	ENSAMXT00000033776	ENSAMXG00000038707	ndrg1b	CDS	NONSYNONYMOUS	G	R	181	0.02	3.16	395	novel	DELETERIOUS
NW_019170544.1	12029039	G	A	ENSAMXT00000033776	ENSAMXG00000038707	ndrg1b	CDS	SYNONYMOUS	Q	Q	186	1	3.16	398	novel	TOLERATED
NW_019170544.1	12029040	A	T	ENSAMXT00000033776	ENSAMXG00000038707	ndrg1b	CDS	NONSYNONYMOUS	N	Y	187	0	3.16	398	novel	DELETERIOUS
NW_019170544.1	12029045	T	C	ENSAMXT00000033776	ENSAMXG00000038707	ndrg1b	CDS	SYNONYMOUS	N	N	188	1	3.16	400	novel	TOLERATED
NW_019170544.1	12029060	G	A	ENSAMXT00000033776	ENSAMXG00000038707	ndrg1b	CDS	SYNONYMOUS	A	A	193	1	3.16	400	novel	TOLERATED
NW_019170544.1	12029080	C	T	ENSAMXT00000033776	ENSAMXG00000038707	ndrg1b	CDS	NONSYNONYMOUS	T	M	200	0.25	3.15	397	novel	TOLERATED
NW_019170544.1	12029089	T	C	ENSAMXT00000033776	ENSAMXG00000038707	ndrg1b	CDS	NONSYNONYMOUS	I	T	203	0	3.16	400	novel	DELETERIOUS
NW_019170544.1	12029090	T	G	ENSAMXT00000033776	ENSAMXG00000038707	ndrg1b	CDS	NONSYNONYMOUS	I	M	203	1	3.16	400	novel	TOLERATED
NW_019170544.1	12029775	G	A	ENSAMXT00000033776	ENSAMXG00000038707	ndrg1b	CDS	NONSYNONYMOUS	R	Q	219	0.02	3.16	400	novel	DELETERIOUS
NW_019170544.1	12029778	A	G	ENSAMXT00000033776	ENSAMXG00000038707	ndrg1b	CDS	NONSYNONYMOUS	N	S	220	0.01	3.16	400	novel	DELETERIOUS
NW_019170544.1	12029785	T	C	ENSAMXT00000033776	ENSAMXG00000038707	ndrg1b	CDS	SYNONYMOUS	D	D	222	0.32	3.16	400	novel	TOLERATED
NW_019170544.1	12029806	T	C	ENSAMXT00000046835	ENSAMXG00000038707	ndrg1b	CDS	SYNONYMOUS	T	T	229	0.07	3.06	329	novel	TOLERATED
NW_019170544.1	12029818	C	T	ENSAMXT00000033776	ENSAMXG00000038707	ndrg1b	CDS	SYNONYMOUS	N	N	233	1	3.18	318	novel	TOLERATED
NW_019170544.1	12029828	T	C	ENSAMXT00000033776	ENSAMXG00000038707	ndrg1b	CDS	SYNONYMOUS	L	L	237	1	3.16	399	novel	TOLERATED
NW_019170544.1	12029830	A	G	ENSAMXT00000033776	ENSAMXG00000038707	ndrg1b	CDS	SYNONYMOUS	L	L	237	1	3.16	399	novel	TOLERATED
NW_019170544.1	12032098	G	A	ENSAMXT00000033776	ENSAMXG00000038707	ndrg1b	CDS	SYNONYMOUS	*	*	374	NA	NA	NA	novel	NA
NW_019170544.1	12607208	CT	C	ENSAMXT00000001819	ENSAMXG00000001785	txnipb	UTR_5	FRAMESHIFT DELETION	NA	NA	NA	NA	NA	NA	NA	NA
NW_019170544.1	12607226	A	G	ENSAMXT00000001819	ENSAMXG00000001785	txnipb	UTR_5	NONCODING	NA	NA	NA	NA	NA	NA	novel	NA
NW_019170544.1	12607249	G	C	ENSAMXT00000001819	ENSAMXG00000001785	txnipb	UTR_5	NONCODING	NA	NA	NA	NA	NA	NA	novel	NA
NW_019170544.1	12607252	G	C	ENSAMXT00000001819	ENSAMXG00000001785	txnipb	UTR_5	NONCODING	NA	NA	NA	NA	NA	NA	novel	NA
NW_019170544.1	12607253	T	A	ENSAMXT00000001819	ENSAMXG00000001785	txnipb	UTR_5	NONCODING	NA	NA	NA	NA	NA	NA	novel	NA
NW_019170544.1	12607259	G	C	ENSAMXT00000001819	ENSAMXG00000001785	txnipb	UTR_5	NONCODING	NA	NA	NA	NA	NA	NA	novel	NA
NW_019170544.1	12607291	C	T	ENSAMXT00000001819	ENSAMXG00000001785	txnipb	UTR_5	NONCODING	NA	NA	NA	NA	NA	NA	novel	NA
NW_019170544.1	12607293	C	T	ENSAMXT00000001819	ENSAMXG00000001785	txnipb	UTR_5	NONCODING	NA	NA	NA	NA	NA	NA	novel	NA
NW_019170544.1	12607309	G	GGAT	ENSAMXT00000001819	ENSAMXG00000001785	txnipb	UTR_5	NONFRAMESHIFT INSERTION	NA	NA	NA	NA	NA	NA	NA	NA
NW_019170544.1	12607312	TTTC	T	ENSAMXT00000001819	ENSAMXG00000001785	txnipb	UTR_5	NONFRAMESHIFT DELETION	NA	NA	NA	NA	NA	NA	NA	NA
NW_019170544.1	12607316	A	C	ENSAMXT00000001819	ENSAMXG00000001785	txnipb	UTR_5	NONCODING	NA	NA	NA	NA	NA	NA	novel	NA
NW_019170544.1	12607319	C	A	ENSAMXT00000001819	ENSAMXG00000001785	txnipb	UTR_5	NONCODING	NA	NA	NA	NA	NA	NA	novel	NA
NW_019170544.1	12607322	C	G	ENSAMXT00000001819	ENSAMXG00000001785	txnipb	UTR_5	NONCODING	NA	NA	NA	NA	NA	NA	novel	NA
NW_019170544.1	12607331	G	A	ENSAMXT00000001819	ENSAMXG00000001785	txnipb	UTR_5	NONCODING	NA	NA	NA	NA	NA	NA	novel	NA
NW_019170544.1	12607331	G	C	ENSAMXT00000001819	ENSAMXG00000001785	txnipb	UTR_5	NONCODING	NA	NA	NA	NA	NA	NA	novel	NA
NW_019170544.1	12607334	G	A	ENSAMXT00000001819	ENSAMXG00000001785	txnipb	UTR_5	NONCODING	NA	NA	NA	NA	NA	NA	novel	NA
NW_019170544.1	12607345	G	A	ENSAMXT00000001819	ENSAMXG00000001785	txnipb	UTR_5	NONCODING	NA	NA	NA	NA	NA	NA	novel	NA
NW_019170544.1	12607377	A	G	ENSAMXT00000001819	ENSAMXG00000001785	txnipb	UTR_5	NONCODING	NA	NA	NA	NA	NA	NA	novel	NA
NW_019170544.1	12607380	C	T	ENSAMXT00000001819	ENSAMXG00000001785	txnipb	UTR_5	NONCODING	NA	NA	NA	NA	NA	NA	novel	NA
NW_019170544.1	12607422	G	GC	ENSAMXT00000001819	ENSAMXG00000001785	txnipb	UTR_5	FRAMESHIFT INSERTION	NA	NA	NA	NA	NA	NA	NA	NA
NW_019170544.1	12607423	T	C	ENSAMXT00000001819	ENSAMXG00000001785	txnipb	UTR_5	NONCODING	NA	NA	NA	NA	NA	NA	novel	NA
NW_019170544.1	12607423	T	TC	ENSAMXT00000001819	ENSAMXG00000001785	txnipb	UTR_5	FRAMESHIFT INSERTION	NA	NA	NA	NA	NA	NA	NA	NA
NW_019170544.1	12607425	T	A	ENSAMXT00000001819	ENSAMXG00000001785	txnipb	UTR_5	NONCODING	NA	NA	NA	NA	NA	NA	novel	NA
NW_019170544.1	12607431	C	A	ENSAMXT00000001819	ENSAMXG00000001785	txnipb	UTR_5	NONCODING	NA	NA	NA	NA	NA	NA	novel	NA
NW_019170544.1	12607431	C	T	ENSAMXT00000001819	ENSAMXG00000001785	txnipb	UTR_5	NONCODING	NA	NA	NA	NA	NA	NA	novel	NA
NW_019170544.1	12607438	G	C	ENSAMXT00000001819	ENSAMXG00000001785	txnipb	UTR_5	NONCODING	NA	NA	NA	NA	NA	NA	novel	NA
NW_019170544.1	12607449	C	T	ENSAMXT00000001819	ENSAMXG00000001785	txnipb	UTR_5	NONCODING	NA	NA	NA	NA	NA	NA	novel	NA
NW_019170544.1	12607474	G	A	ENSAMXT00000001819	ENSAMXG00000001785	txnipb	UTR_5	NONCODING	NA	NA	NA	NA	NA	NA	novel	NA
NW_019170544.1	12607476	A	G	ENSAMXT00000001819	ENSAMXG00000001785	txnipb	UTR_5	NONCODING	NA	NA	NA	NA	NA	NA	novel	NA
NW_019170544.1	12607478	G	A	ENSAMXT00000001819	ENSAMXG00000001785	txnipb	UTR_5	NONCODING	NA	NA	NA	NA	NA	NA	novel	NA
NW_019170544.1	12607486	G	A	ENSAMXT00000001819	ENSAMXG00000001785	txnipb	UTR_5	NONCODING	NA	NA	NA	NA	NA	NA	novel	NA
NW_019170544.1	12607487	G	A	ENSAMXT00000001819	ENSAMXG00000001785	txnipb	UTR_5	NONCODING	NA	NA	NA	NA	NA	NA	novel	NA
NW_019170544.1	12607497	ACAACAACCAGCAG	A	ENSAMXT00000001819	ENSAMXG00000001785	txnipb	UTR_5	FRAMESHIFT DELETION	NA	NA	NA	NA	NA	NA	NA	NA
NW_019170544.1	12607504	C	CCAG	ENSAMXT00000001819	ENSAMXG00000001785	txnipb	UTR_5	NONFRAMESHIFT INSERTION	NA	NA	NA	NA	NA	NA	NA	NA
NW_019170544.1	12607510	GCAA	GCAGCAACAA	ENSAMXT00000001819	ENSAMXG00000001785	txnipb	UTR_5	SUBSTITUTION	NA	NA	NA	NA	NA	NA	NA	NA
NW_019170544.1	12607510	GCAA	G	ENSAMXT00000001819	ENSAMXG00000001785	txnipb	UTR_5	NONFRAMESHIFT DELETION	NA	NA	NA	NA	NA	NA	NA	NA
NW_019170544.1	12607522	A	C	ENSAMXT00000001819	ENSAMXG00000001785	txnipb	UTR_5	NONCODING	NA	NA	NA	NA	NA	NA	novel	NA
NW_019170544.1	12607531	A	AG	ENSAMXT00000001819	ENSAMXG00000001785	txnipb	UTR_5	FRAMESHIFT INSERTION	NA	NA	NA	NA	NA	NA	NA	NA
NW_019170544.1	12607543	G	A	ENSAMXT00000001819	ENSAMXG00000001785	txnipb	UTR_5	NONCODING	NA	NA	NA	NA	NA	NA	novel	NA
NW_019170544.1	12607545	A	G	ENSAMXT00000001819	ENSAMXG00000001785	txnipb	UTR_5	NONCODING	NA	NA	NA	NA	NA	NA	novel	NA
NW_019170544.1	12607559	A	T	ENSAMXT00000001819	ENSAMXG00000001785	txnipb	UTR_5	NONCODING	NA	NA	NA	NA	NA	NA	novel	NA
NW_019170544.1	12607573	G	GAACAGTGAAAGACAGAGGAGTGAA	ENSAMXT00000001819	ENSAMXG00000001785	txnipb	UTR_5	NONFRAMESHIFT INSERTION	NA	NA	NA	NA	NA	NA	NA	NA
NW_019170544.1	12607585	T	A	ENSAMXT00000001819	ENSAMXG00000001785	txnipb	UTR_5	NONCODING	NA	NA	NA	NA	NA	NA	novel	NA
NW_019170544.1	12607589	A	ACTCTTTT	ENSAMXT00000001819	ENSAMXG00000001785	txnipb	UTR_5	FRAMESHIFT INSERTION	NA	NA	NA	NA	NA	NA	NA	NA
NW_019170544.1	12607592	C	T	ENSAMXT00000001819	ENSAMXG00000001785	txnipb	UTR_5	NONCODING	NA	NA	NA	NA	NA	NA	novel	NA
NW_019170544.1	12607594	G	A	ENSAMXT00000001819	ENSAMXG00000001785	txnipb	UTR_5	NONCODING	NA	NA	NA	NA	NA	NA	novel	NA
NW_019170544.1	12607595	A	AG	ENSAMXT00000001819	ENSAMXG00000001785	txnipb	UTR_5	FRAMESHIFT INSERTION	NA	NA	NA	NA	NA	NA	NA	NA
NW_019170544.1	12607598	A	T	ENSAMXT00000001819	ENSAMXG00000001785	txnipb	UTR_5	NONCODING	NA	NA	NA	NA	NA	NA	novel	NA
NW_019170544.1	12607600	TAG	T	ENSAMXT00000001819	ENSAMXG00000001785	txnipb	UTR_5	FRAMESHIFT DELETION	NA	NA	NA	NA	NA	NA	NA	NA
NW_019170544.1	12607600	TAG	CAG	ENSAMXT00000001819	ENSAMXG00000001785	txnipb	UTR_5	SUBSTITUTION	NA	NA	NA	NA	NA	NA	NA	NA
NW_019170544.1	12607603	TG	T	ENSAMXT00000001819	ENSAMXG00000001785	txnipb	UTR_5	FRAMESHIFT DELETION	NA	NA	NA	NA	NA	NA	NA	NA
NW_019170544.1	12607603	TG	AG	ENSAMXT00000001819	ENSAMXG00000001785	txnipb	UTR_5	SUBSTITUTION	NA	NA	NA	NA	NA	NA	NA	NA
NW_019170544.1	12607610	T	C	ENSAMXT00000001819	ENSAMXG00000001785	txnipb	UTR_5	NONCODING	NA	NA	NA	NA	NA	NA	novel	NA
NW_019170544.1	12607612	A	G	ENSAMXT00000001819	ENSAMXG00000001785	txnipb	UTR_5	NONCODING	NA	NA	NA	NA	NA	NA	novel	NA
NW_019170544.1	12607613	G	C	ENSAMXT00000001819	ENSAMXG00000001785	txnipb	UTR_5	NONCODING	NA	NA	NA	NA	NA	NA	novel	NA
NW_019170544.1	12607614	C	A	ENSAMXT00000001819	ENSAMXG00000001785	txnipb	UTR_5	NONCODING	NA	NA	NA	NA	NA	NA	novel	NA
NW_019170544.1	12607616	T	A	ENSAMXT00000001819	ENSAMXG00000001785	txnipb	UTR_5	NONCODING	NA	NA	NA	NA	NA	NA	novel	NA
NW_019170544.1	12607627	A	T	ENSAMXT00000001819	ENSAMXG00000001785	txnipb	UTR_5	NONCODING	NA	NA	NA	NA	NA	NA	novel	NA
NW_019170544.1	12607633	G	A	ENSAMXT00000001819	ENSAMXG00000001785	txnipb	UTR_5	NONCODING	NA	NA	NA	NA	NA	NA	novel	NA
NW_019170544.1	12607667	G	A	ENSAMXT00000034414	ENSAMXG00000001785	txnipb	CDS	NONSYNONYMOUS	E	K	12	0.14	2.98	147	novel	TOLERATED
NW_019170544.1	12607703	C	T	ENSAMXT00000001819	ENSAMXG00000001785	txnipb	CDS	NONSYNONYMOUS	R	C	24	0.42	2.92	151	novel	TOLERATED
NW_019170544.1	12607735	G	C	ENSAMXT00000001819	ENSAMXG00000001785	txnipb	CDS	SYNONYMOUS	V	V	34	1	2.91	152	novel	TOLERATED
NW_019170544.1	12607758	T	A	ENSAMXT00000001819	ENSAMXG00000001785	txnipb	CDS	NONSYNONYMOUS	I	K	42	0.12	2.91	151	novel	TOLERATED
NW_019170544.1	12607758	T	C	ENSAMXT00000001819	ENSAMXG00000001785	txnipb	CDS	NONSYNONYMOUS	I	T	42	0	2.91	151	novel	DELETERIOUS
NW_019170544.1	12607762	G	GA	ENSAMXT00000001819	ENSAMXG00000001785	txnipb	CDS	FRAMESHIFT INSERTION	NA	NA	NA	NA	NA	NA	NA	NA
NW_019170544.1	12607789	T	C	ENSAMXT00000001819	ENSAMXG00000001785	txnipb	CDS	SYNONYMOUS	G	G	52	1	2.91	157	novel	TOLERATED
NW_019170544.1	12607805	T	C	ENSAMXT00000001819	ENSAMXG00000001785	txnipb	CDS	NONSYNONYMOUS	Y	H	58	0.28	2.9	152	novel	TOLERATED
NW_019170544.1	12607810	C	T	ENSAMXT00000001819	ENSAMXG00000001785	txnipb	CDS	SYNONYMOUS	H	H	59	0.17	2.9	154	novel	TOLERATED
NW_019170544.1	12607822	G	A	ENSAMXT00000001819	ENSAMXG00000001785	txnipb	CDS	SYNONYMOUS	Q	Q	63	1	2.88	154	novel	TOLERATED
NW_019170544.1	12607823	C	A	ENSAMXT00000001819	ENSAMXG00000001785	txnipb	CDS	NONSYNONYMOUS	R	S	64	0.12	2.89	148	novel	TOLERATED
NW_019170544.1	12607835	GA	G	ENSAMXT00000034414	ENSAMXG00000001785	txnipb	CDS	FRAMESHIFT DELETION	NA	NA	NA	NA	NA	NA	NA	NA
NW_019170544.1	12607861	G	T	ENSAMXT00000034414	ENSAMXG00000001785	txnipb	CDS	NONSYNONYMOUS	E	D	76	0.78	2.91	157	novel	TOLERATED
NW_019170544.1	12607867	T	A	ENSAMXT00000001819	ENSAMXG00000001785	txnipb	CDS	SYNONYMOUS	L	L	78	1	2.89	157	novel	TOLERATED
NW_019170544.1	12607868	C	A	ENSAMXT00000034414	ENSAMXG00000001785	txnipb	CDS	NONSYNONYMOUS	H	N	79	0.22	2.9	154	novel	TOLERATED
NW_019170544.1	12607875	A	G	ENSAMXT00000001819	ENSAMXG00000001785	txnipb	CDS	NONSYNONYMOUS	D	G	81	0.02	2.95	151	novel	DELETERIOUS
NW_019170544.1	12607876	C	G	ENSAMXT00000034414	ENSAMXG00000001785	txnipb	CDS	NONSYNONYMOUS	D	E	81	0.81	2.96	151	novel	TOLERATED
NW_019170544.1	12607882	G	T	ENSAMXT00000034414	ENSAMXG00000001785	txnipb	CDS	NONSYNONYMOUS	Q	H	83	0.14	2.86	155	novel	TOLERATED
NW_019170544.1	12607885	C	T	ENSAMXT00000001819	ENSAMXG00000001785	txnipb	CDS	SYNONYMOUS	P	P	84	1	2.87	160	novel	TOLERATED
NW_019170544.1	12608222	C	A	ENSAMXT00000001819	ENSAMXG00000001785	txnipb	CDS	NONSYNONYMOUS	D	E	86	0.03	2.85	167	novel	DELETERIOUS
NW_019170544.1	12608261	C	T	ENSAMXT00000001819	ENSAMXG00000001785	txnipb	CDS	SYNONYMOUS	Y	Y	99	1	2.77	192	novel	TOLERATED
NW_019170544.1	12608287	C	A	ENSAMXT00000001819	ENSAMXG00000001785	txnipb	CDS	NONSYNONYMOUS	P	H	108	0	2.78	193	novel	DELETERIOUS
NW_019170544.1	12608411	C	T	ENSAMXT00000034414	ENSAMXG00000001785	txnipb	CDS	NONSYNONYMOUS	A	V	114	0.95	2.86	199	novel	TOLERATED
NW_019170544.1	12608412	G	A	ENSAMXT00000001819	ENSAMXG00000001785	txnipb	CDS	SYNONYMOUS	A	A	114	1	2.82	199	novel	TOLERATED
NW_019170544.1	12608438	C	T	ENSAMXT00000001819	ENSAMXG00000001785	txnipb	CDS	NONSYNONYMOUS	S	F	123	0.61	2.8	203	novel	TOLERATED
NW_019170544.1	12608439	T	A	ENSAMXT00000001819	ENSAMXG00000001785	txnipb	CDS	SYNONYMOUS	S	S	123	0.65	2.8	203	novel	TOLERATED
NW_019170544.1	12608442	G	C	ENSAMXT00000001819	ENSAMXG00000001785	txnipb	CDS	SYNONYMOUS	V	V	124	1	2.76	204	novel	TOLERATED
NW_019170544.1	12608445	A	G	ENSAMXT00000001819	ENSAMXG00000001785	txnipb	CDS	SYNONYMOUS	E	E	125	0.34	2.76	204	novel	TOLERATED
NW_019170544.1	12608449	T	A	ENSAMXT00000001819	ENSAMXG00000001785	txnipb	CDS	NONSYNONYMOUS	Y	N	127	0.01	2.76	204	novel	DELETERIOUS
NW_019170544.1	12608454	G	C	ENSAMXT00000001819	ENSAMXG00000001785	txnipb	CDS	SYNONYMOUS	V	V	128	1	2.8	203	novel	TOLERATED
NW_019170544.1	12608469	G	A	ENSAMXT00000001819	ENSAMXG00000001785	txnipb	CDS	SYNONYMOUS	E	E	133	1	2.8	203	novel	TOLERATED
NW_019170544.1	12608472	G	T	ENSAMXT00000001819	ENSAMXG00000001785	txnipb	CDS	SYNONYMOUS	R	R	134	1	2.8	202	novel	TOLERATED
NW_019170544.1	12608478	G	A	ENSAMXT00000001819	ENSAMXG00000001785	txnipb	CDS	SYNONYMOUS	S	S	136	1	2.9	176	novel	TOLERATED
NW_019170544.1	12608483	C	T	ENSAMXT00000001819	ENSAMXG00000001785	txnipb	CDS	NONSYNONYMOUS	S	L	138	0.79	2.8	202	novel	TOLERATED
NW_019170544.1	12608486	G	A	ENSAMXT00000001819	ENSAMXG00000001785	txnipb	CDS	NONSYNONYMOUS	G	E	139	0.08	2.94	75	novel	TOLERATED
NW_019170544.1	12608496	G	C	ENSAMXT00000001819	ENSAMXG00000001785	txnipb	CDS	NONSYNONYMOUS	E	D	142	0	2.8	202	novel	DELETERIOUS
NW_019170544.1	12608532	C	T	ENSAMXT00000001819	ENSAMXG00000001785	txnipb	CDS	SYNONYMOUS	D	D	154	1	2.79	209	novel	TOLERATED
NW_019170544.1	12608533	A	G	ENSAMXT00000001819	ENSAMXG00000001785	txnipb	CDS	NONSYNONYMOUS	I	V	155	1	2.79	209	novel	TOLERATED
NW_019170544.1	12608541	G	A	ENSAMXT00000001819	ENSAMXG00000001785	txnipb	CDS	SYNONYMOUS	T	T	157	1	2.79	209	novel	TOLERATED
NW_019170544.1	12608542	C	A	ENSAMXT00000001819	ENSAMXG00000001785	txnipb	CDS	NONSYNONYMOUS	L	I	158	0	2.79	206	novel	DELETERIOUS
NW_019170544.1	12608671	T	C	ENSAMXT00000001819	ENSAMXG00000001785	txnipb	CDS	SYNONYMOUS	L	L	172	0.22	2.76	213	novel	TOLERATED
NW_019170544.1	12608694	T	C	ENSAMXT00000001819	ENSAMXG00000001785	txnipb	CDS	SYNONYMOUS	D	D	179	1	2.77	221	novel	TOLERATED
NW_019170544.1	12608703	A	G	ENSAMXT00000001819	ENSAMXG00000001785	txnipb	CDS	SYNONYMOUS	V	V	182	1	2.76	220	novel	TOLERATED
NW_019170544.1	12608709	C	A	ENSAMXT00000001819	ENSAMXG00000001785	txnipb	CDS	SYNONYMOUS	I	I	184	1	2.76	220	novel	TOLERATED
NW_019170544.1	12608712	T	G	ENSAMXT00000001819	ENSAMXG00000001785	txnipb	CDS	SYNONYMOUS	T	T	185	0.23	2.76	220	novel	TOLERATED
NW_019170544.1	12608723	A	G	ENSAMXT00000001819	ENSAMXG00000001785	txnipb	CDS	NONSYNONYMOUS	N	S	189	0	2.76	219	novel	DELETERIOUS
NW_019170544.1	12608730	G	A	ENSAMXT00000001819	ENSAMXG00000001785	txnipb	CDS	SYNONYMOUS	K	K	191	1	2.76	220	novel	TOLERATED
NW_019170544.1	12608766	C	A	ENSAMXT00000001819	ENSAMXG00000001785	txnipb	CDS	SYNONYMOUS	G	G	203	0.03	2.75	231	novel	DELETERIOUS
NW_019170544.1	12608775	G	A	ENSAMXT00000001819	ENSAMXG00000001785	txnipb	CDS	SYNONYMOUS	E	E	206	1	2.76	233	novel	TOLERATED
NW_019170544.1	12608833	T	C	ENSAMXT00000001819	ENSAMXG00000001785	txnipb	CDS	SYNONYMOUS	L	L	226	1	2.75	237	novel	TOLERATED
NW_019170544.1	12608835	G	T	ENSAMXT00000001819	ENSAMXG00000001785	txnipb	CDS	NONSYNONYMOUS	L	F	226	0.26	2.75	237	novel	TOLERATED
NW_019170544.1	12608841	C	T	ENSAMXT00000001819	ENSAMXG00000001785	txnipb	CDS	SYNONYMOUS	N	N	228	1	2.76	234	novel	TOLERATED
NW_019170544.1	12608849	G	A	ENSAMXT00000034414	ENSAMXG00000001785	txnipb	CDS	NONSYNONYMOUS	R	K	231	0.12	2.82	236	novel	TOLERATED
NW_019170544.1	12608859	T	C	ENSAMXT00000001819	ENSAMXG00000001785	txnipb	CDS	SYNONYMOUS	F	F	234	1	2.77	236	novel	TOLERATED
NW_019170544.1	12608874	A	C	ENSAMXT00000001819	ENSAMXG00000001785	txnipb	CDS	SYNONYMOUS	S	S	239	1	2.78	235	novel	TOLERATED
NW_019170544.1	12608874	A	T	ENSAMXT00000001819	ENSAMXG00000001785	txnipb	CDS	SYNONYMOUS	S	S	239	1	2.78	235	novel	TOLERATED
NW_019170544.1	12608892	T	C	ENSAMXT00000001819	ENSAMXG00000001785	txnipb	CDS	SYNONYMOUS	H	H	245	1	2.77	236	novel	TOLERATED
NW_019170544.1	12608902	G	A	ENSAMXT00000001819	ENSAMXG00000001785	txnipb	CDS	NONSYNONYMOUS	G	S	249	0	2.77	236	novel	DELETERIOUS
NW_019170544.1	12608914	T	G	ENSAMXT00000001819	ENSAMXG00000001785	txnipb	CDS	NONSYNONYMOUS	L	V	253	0.64	2.77	236	novel	TOLERATED
NW_019170544.1	12608925	C	A	ENSAMXT00000001819	ENSAMXG00000001785	txnipb	CDS	SYNONYMOUS	G	G	256	1	2.76	234	novel	TOLERATED
NW_019170544.1	12608929	A	C	ENSAMXT00000001819	ENSAMXG00000001785	txnipb	CDS	NONSYNONYMOUS	S	R	258	0	2.76	234	novel	DELETERIOUS
NW_019170544.1	12608935	C	G	ENSAMXT00000001819	ENSAMXG00000001785	txnipb	CDS	NONSYNONYMOUS	R	G	260	0	2.76	235	novel	DELETERIOUS
NW_019170544.1	12608958	C	T	ENSAMXT00000001819	ENSAMXG00000001785	txnipb	CDS	SYNONYMOUS	T	T	267	0.26	2.77	237	novel	TOLERATED
NW_019170544.1	12608970	C	T	ENSAMXT00000001819	ENSAMXG00000001785	txnipb	CDS	SYNONYMOUS	C	C	271	1	2.77	237	novel	TOLERATED
NW_019170544.1	12609309	G	T	ENSAMXT00000001819	ENSAMXG00000001785	txnipb	CDS	STOP-GAIN	E	*	290	NA	NA	NA	novel	NA
NW_019170544.1	12609321	C	T	ENSAMXT00000001819	ENSAMXG00000001785	txnipb	CDS	SYNONYMOUS	L	L	294	1	2.76	236	novel	TOLERATED
NW_019170544.1	12609329	T	A	ENSAMXT00000001819	ENSAMXG00000001785	txnipb	CDS	SYNONYMOUS	L	L	296	1	2.76	233	novel	TOLERATED
NW_019170544.1	12609335	T	C	ENSAMXT00000001819	ENSAMXG00000001785	txnipb	CDS	SYNONYMOUS	L	L	298	1	2.76	232	novel	TOLERATED
NW_019170544.1	12609338	A	C	ENSAMXT00000001819	ENSAMXG00000001785	txnipb	CDS	SYNONYMOUS	V	V	299	1	2.76	231	novel	TOLERATED
NW_019170544.1	12609355	T	A	ENSAMXT00000001819	ENSAMXG00000001785	txnipb	CDS	NONSYNONYMOUS	F	Y	305	1	2.76	187	novel	TOLERATED
NW_019170544.1	12609361	G	A	ENSAMXT00000001819	ENSAMXG00000001785	txnipb	CDS	NONSYNONYMOUS	G	D	307	0.01	2.77	228	novel	DELETERIOUS
NW_019170544.1	12609366	G	A	ENSAMXT00000001819	ENSAMXG00000001785	txnipb	CDS	NONSYNONYMOUS	A	T	309	0.04	2.76	228	novel	DELETERIOUS
NW_019170544.1	12609371	T	C	ENSAMXT00000001819	ENSAMXG00000001785	txnipb	CDS	SYNONYMOUS	S	S	310	1	2.76	230	novel	TOLERATED
NW_019170544.1	12609386	G	T	ENSAMXT00000001819	ENSAMXG00000001785	txnipb	CDS	NONSYNONYMOUS	M	I	315	0.18	2.78	225	novel	TOLERATED
NW_019170544.1	12609395	G	T	ENSAMXT00000001819	ENSAMXG00000001785	txnipb	CDS	NONSYNONYMOUS	Q	H	318	0.03	2.83	224	novel	DELETERIOUS
NW_019170544.1	12609396	G	C	ENSAMXT00000001819	ENSAMXG00000001785	txnipb	CDS	NONSYNONYMOUS	D	H	319	0.46	2.81	204	novel	TOLERATED
NW_019170544.1	12609397	A	C	ENSAMXT00000001819	ENSAMXG00000001785	txnipb	CDS	NONSYNONYMOUS	D	A	319	0.99	2.81	204	novel	TOLERATED
NW_019170544.1	12609398	T	G	ENSAMXT00000001819	ENSAMXG00000001785	txnipb	CDS	NONSYNONYMOUS	D	E	319	1	2.81	204	novel	TOLERATED
NW_019170544.1	12609399	G	A	ENSAMXT00000001819	ENSAMXG00000001785	txnipb	CDS	NONSYNONYMOUS	G	S	320	0.94	2.82	204	novel	TOLERATED
NW_019170544.1	12609402	A	T	ENSAMXT00000001819	ENSAMXG00000001785	txnipb	CDS	NONSYNONYMOUS	S	C	321	0.03	2.79	209	novel	DELETERIOUS
NW_019170544.1	12609405	G	T	ENSAMXT00000001819	ENSAMXG00000001785	txnipb	CDS	NONSYNONYMOUS	A	S	322	0.9	2.82	204	novel	TOLERATED
NW_019170544.1	12609407	A	AT	ENSAMXT00000034414	ENSAMXG00000001785	txnipb	CDS	FRAMESHIFT INSERTION	NA	NA	NA	NA	NA	NA	NA	NA
NW_019170544.1	12609410	C	T	ENSAMXT00000001819	ENSAMXG00000001785	txnipb	CDS	SYNONYMOUS	A	A	323	0.95	2.82	211	novel	TOLERATED
NW_019170544.1	12609420	A	G	ENSAMXT00000001819	ENSAMXG00000001785	txnipb	CDS	NONSYNONYMOUS	T	A	327	0.73	2.78	208	novel	TOLERATED
NW_019170544.1	12609421	C	T	ENSAMXT00000001819	ENSAMXG00000001785	txnipb	CDS	NONSYNONYMOUS	T	M	327	0.25	2.78	208	novel	TOLERATED
NW_019170544.1	12609425	G	C	ENSAMXT00000034414	ENSAMXG00000001785	txnipb	CDS	SYNONYMOUS	V	V	328	0.72	2.84	208	novel	TOLERATED
NW_019170544.1	12609434	C	T	ENSAMXT00000001819	ENSAMXG00000001785	txnipb	CDS	SYNONYMOUS	P	P	331	1	2.79	222	novel	TOLERATED
NW_019170544.1	12609446	C	T	ENSAMXT00000001819	ENSAMXG00000001785	txnipb	CDS	SYNONYMOUS	P	P	335	1	2.79	220	novel	TOLERATED
NW_019170544.1	12609453	A	G	ENSAMXT00000001819	ENSAMXG00000001785	txnipb	CDS	NONSYNONYMOUS	S	G	338	0.12	2.78	220	novel	TOLERATED
NW_019170544.1	12609522	G	A	ENSAMXT00000001819	ENSAMXG00000001785	txnipb	CDS	NONSYNONYMOUS	D	N	361	0.02	2.8	198	novel	DELETERIOUS
NW_019170544.1	12609563	G	T	ENSAMXT00000001819	ENSAMXG00000001785	txnipb	CDS	SYNONYMOUS	T	T	374	0.43	2.78	204	novel	TOLERATED
NW_019170544.1	12609566	T	TC	ENSAMXT00000001819	ENSAMXG00000001785	txnipb	CDS	FRAMESHIFT INSERTION	NA	NA	NA	NA	NA	NA	NA	NA
NW_019170544.1	12609611	TTTGATAGCTGTTAG	TCTGTTAG	ENSAMXT00000034414	ENSAMXG00000001785	txnipb	CDS	FRAMESHIFT DELETION	NA	NA	NA	NA	NA	NA	NA	NA
NW_019170544.1	12609611	TTTGATAGCTGTTAG	T	ENSAMXT00000034414	ENSAMXG00000001785	txnipb	CDS	FRAMESHIFT DELETION	NA	NA	NA	NA	NA	NA	NA	NA
NW_019170544.1	12609629	A	T	ENSAMXT00000034414	ENSAMXG00000001785	txnipb	CDS	STOP-LOSS	*	C	396	NA	NA	NA	novel	NA
NW_019170544.1	12609630	T	C	ENSAMXT00000034414	ENSAMXG00000001785	txnipb	UTR_3	NONCODING	NA	NA	NA	NA	NA	NA	novel	NA
NW_019170544.1	12609640	A	T	ENSAMXT00000034414	ENSAMXG00000001785	txnipb	UTR_3	NONCODING	NA	NA	NA	NA	NA	NA	novel	NA
NW_019170544.1	12609651	AGAACACTTAAGCATTTC	A	ENSAMXT00000034414	ENSAMXG00000001785	txnipb	UTR_3	FRAMESHIFT DELETION	NA	NA	NA	NA	NA	NA	NA	NA
NW_019170544.1	12609654	A	G	ENSAMXT00000034414	ENSAMXG00000001785	txnipb	UTR_3	NONCODING	NA	NA	NA	NA	NA	NA	novel	NA
NW_019170544.1	12609662	G	A	ENSAMXT00000034414	ENSAMXG00000001785	txnipb	UTR_3	NONCODING	NA	NA	NA	NA	NA	NA	novel	NA
NW_019170544.1	12609671	C	G	ENSAMXT00000034414	ENSAMXG00000001785	txnipb	UTR_3	NONCODING	NA	NA	NA	NA	NA	NA	novel	NA
NW_019170544.1	12609678	T	C	ENSAMXT00000034414	ENSAMXG00000001785	txnipb	UTR_3	NONCODING	NA	NA	NA	NA	NA	NA	novel	NA
NW_019170544.1	12609687	C	T	ENSAMXT00000034414	ENSAMXG00000001785	txnipb	UTR_3	NONCODING	NA	NA	NA	NA	NA	NA	novel	NA
NW_019170544.1	12609688	C	T	ENSAMXT00000034414	ENSAMXG00000001785	txnipb	UTR_3	NONCODING	NA	NA	NA	NA	NA	NA	novel	NA
NW_019170544.1	12609689	C	T	ENSAMXT00000034414	ENSAMXG00000001785	txnipb	UTR_3	NONCODING	NA	NA	NA	NA	NA	NA	novel	NA
NW_019170544.1	12609702	C	T	ENSAMXT00000034414	ENSAMXG00000001785	txnipb	UTR_3	NONCODING	NA	NA	NA	NA	NA	NA	novel	NA
NW_019170544.1	12609703	C	A	ENSAMXT00000034414	ENSAMXG00000001785	txnipb	UTR_3	NONCODING	NA	NA	NA	NA	NA	NA	novel	NA
NW_019170544.1	12609709	T	C	ENSAMXT00000034414	ENSAMXG00000001785	txnipb	UTR_3	NONCODING	NA	NA	NA	NA	NA	NA	novel	NA
NW_019170544.1	12609717	G	A	ENSAMXT00000034414	ENSAMXG00000001785	txnipb	UTR_3	NONCODING	NA	NA	NA	NA	NA	NA	novel	NA
NW_019170544.1	12609725	G	A	ENSAMXT00000034414	ENSAMXG00000001785	txnipb	UTR_3	NONCODING	NA	NA	NA	NA	NA	NA	novel	NA
[truncated: 134,950 more rows]
